# Supplementary material for: Multicomponent synthesis of di-aryl dithiocarbamates via electron donor–acceptor photoactivation with thianthrenium salts
Source: Royal Society of Chemistry journal article supplement (doi:10.1039/d3gc00336a), 2023-01-01

# Multicomponent synthesis of di-aryl dithiocarbamates via electron donor–acceptor photoactivation with thianthrenium salts.

Min Liu<sup>a</sup>, Yong Qian<sup>a</sup>, Yanqi Wu<sup>\*b,a</sup> and Fengzhi Zhang<sup>\*b,a</sup>

<sup>a</sup> Zhejiang University of Technology, Hangzhou, 310014, P.R.China.

<sup>b</sup> School of Pharmaceutical Science, Hangzhou Medical College, Hangzhou, 310013, P.R.China

Email: fengzhi\_zhang@hotmail.com

## Table of contents

|                                                                     |           |
|---------------------------------------------------------------------|-----------|
| <b>I. General informations.....</b>                                 | <b>2</b>  |
| <b>II. Optimization of reaction conditions. ....</b>                | <b>4</b>  |
| <b>III. Experimental procedures. ....</b>                           | <b>7</b>  |
| General procedure for the synthesis of S-Aryl Dithiocarbamates..... | 7         |
| Gram-scale reaction .....                                           | 8         |
| <b>IV. Experiments of investigations on the mechanism.....</b>      | <b>10</b> |
| UV-vis absorption spectra .....                                     | 10        |
| Job's plot .....                                                    | 10        |
| Light on/off experiment .....                                       | 12        |
| Radical Clock Cyclization Experiment.....                           | 13        |
| <b>V. Characterization of products .....</b>                        | <b>14</b> |
| <b>VI. Reference.....</b>                                           | <b>31</b> |
| <b>VII. NMR spectra.....</b>                                        | <b>32</b> |

## I. General informations.

All reagents were obtained from commercial suppliers and used without further purification. Aryl thianthrenium Salts **2** were prepared from the previous procedures.<sup>1,4</sup> Yields for all compounds were determined by the column chromatography which was generally performed on silica gel (200-300 mesh) using petroleum ether 40-60 (PE)/EtOAc as eluent, and reactions were monitored by thin layer chromatography (TLC) on a glass pate coated with silica gel with fluorescent indicator (GF254) using UV light. The <sup>1</sup>H and <sup>13</sup>C nuclear magnetic resonance (NMR) spectra were recorded on a Bruker ADNANCE III 500 MHz using CDCl<sub>3</sub> as solvent with TMS as internal standard. Chemical shifts are given in ppm (δ) referenced to CDCl<sub>3</sub> with 7.26 for <sup>1</sup>H and 77.16 for <sup>13</sup>C, and to DMSO-d<sub>6</sub> with 2.50 for <sup>1</sup>H and 39.52 for <sup>13</sup>C. Signals are abbreviated as follows: s, singlet; d, doublet; t, triplet; q, quartet; m, multiplet, or combinations thereof, and coupling constants are expressed in hertz. Melting points were measured on a SGW<sup>®</sup> X-4B apparatus and uncorrected. HRMS were recorded on Agilent 6210TOF LC/MS mass spectrometer. UV-visible spectroscopy was recorded on a Shimadzu UV-2250 UV-visible spectrophotometer.

All reactions were investigated in borosilicate glass vessels irradiated by a blue light LED manufactured by Xuzhou Ai Jia Electronic Technology Co., Ltd. without using filters.

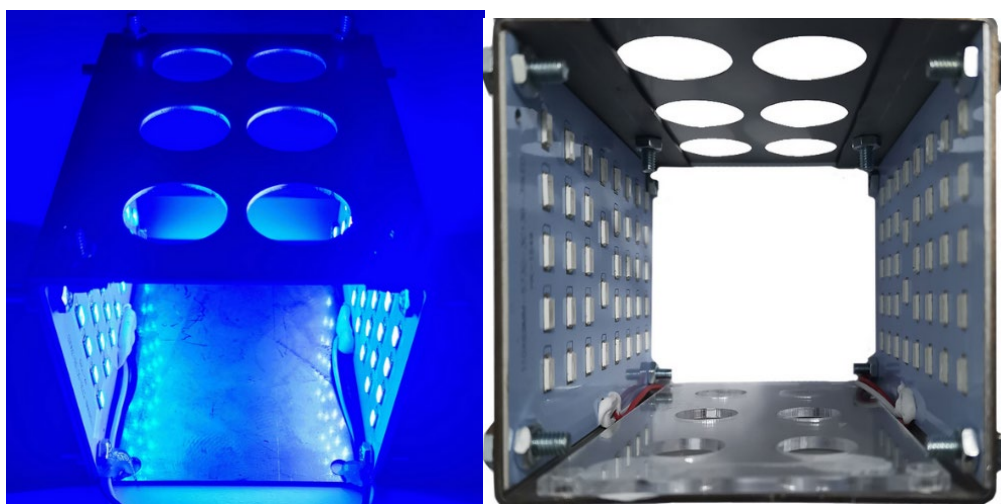

**Figure S1.** The blue LED lamp.

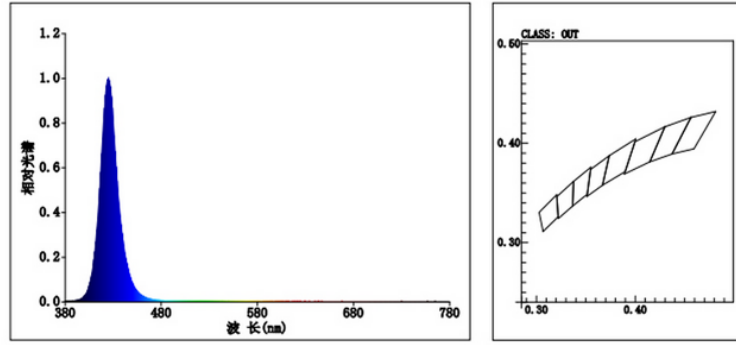

**颜色参数:**

色品坐标:  $x=0.1678$   $y=0.0129/u'=0.2381$   $v'=0.0411$   $duv=-2.453e-001$

相关色温:  $T_c=100000K$  主波长:  $\lambda_d=436.9nm$  色纯度: Purity=98.9%

色比: R=2.3% G=25.7% B=72.0% 峰值波长:  $\lambda_p=424.6nm$  半宽度:  $\Delta \lambda_d=18.8nm$

显色指数:  $R_a=64.8$

R1 =14 R2 =-39 R3 =-186 R4 =-142 R5 =18 R6 =-39 R7 =-77

R8 =-68 R9 =-206 R10=-254 R11=-152 R12=-121 R13=10 R14=-46 R15=47

**光度参数:**

光通量  $\Phi_v = 0.9319 lm$  光效:  $4.37 lm/W$   $\Phi_e = 82.20 mW$

**Figure S2.** The spectrum of our lamp

## II. Optimization of reaction conditions.

**Table S1: Screening of solvents.**

| Entry <sup>a</sup> | Solvent | Yield of <b>3a</b> <sup>b</sup> | Entry <sup>a</sup> | Solvent          | Yield of <b>3a</b> <sup>b</sup> |
|--------------------|---------|---------------------------------|--------------------|------------------|---------------------------------|
| 1                  | DMF     | 52%                             | 5                  | Acetone          | N.D. <sup>c</sup>               |
| 2                  | MeCN    | messy                           | 6                  | PhMe             | Trace                           |
| 3                  | DCE     | N.D. <sup>c</sup>               | 7                  | H <sub>2</sub> O | 44%                             |
| 4                  | MeOH    | messy                           | 8                  | DMSO             | 80%                             |

<sup>a</sup> **1a** (1.0 eq.), CS<sub>2</sub> (2.0 eq.) and CS<sub>2</sub>CO<sub>3</sub> (2.0 eq.) were dissolved in solvent (2 mL), stirred for 1h at 40 °C; then **2a** (0.2 mmol) was added, irradiation with 10w blue LED (420 nm) at room temperature (~35-40 °C) under N<sub>2</sub> for 8h. <sup>b</sup> Isolated yield. <sup>c</sup> N.D. = No detected.

**Table S2: Screening of light sources.**

| Entry <sup>a</sup> | Light source  | Yield of <b>3a</b> <sup>b</sup> |
|--------------------|---------------|---------------------------------|
| 1                  | 420 nm (10 W) | 80%                             |
| 2                  | 460 nm (10 W) | 70%                             |
| 3                  | 395 nm (10 W) | 44%                             |
| 4                  | White CFL     | 48%                             |
| 5                  | Dark          | 0%                              |

<sup>a</sup> **1a** (1.0 eq.), CS<sub>2</sub> (2.0 eq.) and CS<sub>2</sub>CO<sub>3</sub> (2.0 eq.) were dissolved in DMSO (2 mL), stirred for 1h at 40 °C; then **2a** (0.2 mmol) was added, irradiation with different lights at room temperature (~35-40 °C) under N<sub>2</sub> for 8h. <sup>b</sup> Isolated yield.

**Table S3: Screening of bases.**

| Entry <sup>a</sup> | Base                            | Yield of <b>3a</b> <sup>b</sup> | Entry <sup>a</sup> | Base              | Yield of <b>3a</b> <sup>b</sup> |
|--------------------|---------------------------------|---------------------------------|--------------------|-------------------|---------------------------------|
| 1                  | NaOH                            | N. D. <sup>c</sup>              | 5                  | CsF               | 75%                             |
| 2                  | K <sub>2</sub> CO <sub>3</sub>  | 63%                             | 6                  | KOH               | 59%                             |
| 3                  | Na <sub>2</sub> CO <sub>3</sub> | 80%                             | 7                  | Et <sub>3</sub> N | 55%                             |
| 4                  | K <sub>3</sub> PO <sub>4</sub>  | messy                           | 8                  | none              | N. R. <sup>d</sup>              |

<sup>a</sup> **1a** (1.0 eq.), CS<sub>2</sub> (2.0 eq.) and base (2.0 eq.) were dissolved in DMSO (2 mL), stirred for 1h at 40 °C; then **2a** (0.2 mmol) was added, irradiation with 10w blue LED (420 nm) at room temperature (~35-40 °C) under N<sub>2</sub> for 8h. <sup>b</sup> Isolated yield. <sup>c</sup> N.D. = No detected. <sup>d</sup> N.R. = No reaction.

**Table S4: Screening of the amount of CS<sub>2</sub> and Na<sub>2</sub>CO<sub>3</sub>**

| Entry <sup>a</sup> | CS <sub>2</sub><br>(X eq.) | Na <sub>2</sub> CO <sub>3</sub><br>(X eq.) | Yield of<br><b>3a</b> <sup>b</sup> | Entry <sup>a</sup> | CS <sub>2</sub><br>(X eq.) | Na <sub>2</sub> CO <sub>3</sub><br>(X eq.) | Yield of<br><b>3a</b> <sup>b</sup> |
|--------------------|----------------------------|--------------------------------------------|------------------------------------|--------------------|----------------------------|--------------------------------------------|------------------------------------|
| 1                  | 1.0                        | 2.0                                        | 37%                                | 4                  | 1.5                        | 2.0                                        | 52%                                |
| 2                  | 1.0                        | 1.1                                        | 40%                                | 5                  | 2.5                        | 2.0                                        | 70%                                |
| 3 <sup>c</sup>     | 2.0                        | 2.0                                        | 74%                                | 6                  | 2.0                        | 1.1                                        | 80%                                |

<sup>a</sup> **1a** (1.0 eq.), CS<sub>2</sub> (X eq.) and Na<sub>2</sub>CO<sub>3</sub> (X eq.) were dissolved in DMSO (2 mL), stirred for 1h at 40 °C; then **2a** (0.2 mmol) was added, irradiation with 10w blue LED (420 nm) at room temperature (~35-40 °C) under N<sub>2</sub> for 8h. <sup>b</sup> Isolated yield. <sup>c</sup> **1a** (1.0 eq.), CS<sub>2</sub> (2 eq.), Na<sub>2</sub>CO<sub>3</sub> (2.0 eq.) and **2a** (0.2 mmol) were dissolved in solvent. irradiation with 10w blue LED (420 nm) at room temperature (~35-40 °C) under N<sub>2</sub> for 8h.

**Table S5: Screening of the mixture solvents and others**

| Entry <sup>a</sup> | Solvent                                   | Yield of <b>3a</b> <sup>b</sup> |
|--------------------|-------------------------------------------|---------------------------------|
| 1                  | DMSO (1 mL)                               | 59%                             |
| 2                  | DMSO (4 mL)                               | 45%                             |
| 3                  | DMSO : H <sub>2</sub> O (0.4 mL : 1.6 mL) | 55%                             |
| 4                  | DMSO : H <sub>2</sub> O (1.0 mL : 1.0 mL) | 81%                             |
| 5                  | DMSO : H <sub>2</sub> O (0.5 mL : 0.5 mL) | 74%                             |
| 6 <sup>c</sup>     | DMSO : H <sub>2</sub> O (1.0 mL : 1.0 mL) | 50%                             |
| 7 <sup>d</sup>     | DMSO : H <sub>2</sub> O (1.0 mL : 1.0 mL) | 60%                             |
| 8 <sup>d</sup>     | DMSO (2 mL)                               | 56%                             |

<sup>a</sup> **1a** (1.0 eq.), CS<sub>2</sub> (2 eq.) and Na<sub>2</sub>CO<sub>3</sub> (1.1 eq.) were dissolved in solvent (X mL), stirred for 1h at 40 °C; then **2a** (0.2 mmol) was added, irradiation with 10w blue LED (420 nm) at room temperature (~35-40 °C) under N<sub>2</sub> for 8h. <sup>b</sup> Isolated yield. <sup>c</sup> air atmosphere. <sup>d</sup> **1a** (1.0 eq.), CS<sub>2</sub> (2 eq.), Na<sub>2</sub>CO<sub>3</sub> (1.1 eq.) and **2a** (0.2 mmol) were dissolved in solvent. irradiation with 10w blue LED (420 nm) at room temperature (~35-40 °C) under N<sub>2</sub> for 8h.

### III. Experimental procedures.

#### General procedure for the synthesis of S-Aryl Dithiocarbamates.

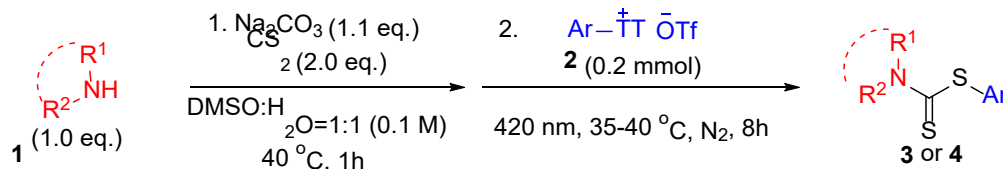

**General procedure A:** To a 5 mL glass tube was charged with secondary aromatic or aliphatic amine (1.0 equiv), CS<sub>2</sub> (25 μL, 0.4 mmol, 2.0 eq.), and Na<sub>2</sub>CO<sub>3</sub> (23.3 mg, 0.22 mmol, 1.1 equiv) in 2 mL mixture solvent (DMSO : H<sub>2</sub>O = 1 mL : 1 mL) for 1h at 40 °C, then aryl thianthrenium salt **2** (0.2 mmol) was added, the tube was sealed with a rubber plug and purged with N<sub>2</sub> for three times. The reaction was stirred and irradiated with a 420 nm blue LEDs (approximately 2 cm away from the light source) at room temperature (the actual reaction temperature is about 35~40 °C) for 8 h. The reaction mixture was diluted with 25.0 mL of dichloromethane, followed by washing with 5 mL of H<sub>2</sub>O. The dichloromethane layer was dried over Na<sub>2</sub>SO<sub>4</sub>, filtered, and the solvent was removed under reduced pressure. The resulting crude product was purified by column chromatography (eluent: PE/AcOEt) to provide the products **3** or **4**.

**General procedure B:** To a 5 mL glass tube was charged with secondary aromatic or aliphatic amine (1.0 equiv), CS<sub>2</sub> (25 μL, 0.4 mmol, 2.0 eq.), and Cs<sub>2</sub>CO<sub>3</sub> (130.4 mg, 0.4 mmol, 2.0 equiv) in 2 mL mixture solvent (DMSO : H<sub>2</sub>O = 1 mL : 1 mL) for 5h at 40 °C, then aryl thianthrenium salt **2** (0.2 mmol) was added, the tube was sealed with a rubber plug and purged with N<sub>2</sub> for three times. The reaction was stirred and irradiated with a 420 nm blue LEDs (approximately 2 cm away from the light source) at room temperature (the actual reaction temperature is about 35~40 °C) for 12 h. The reaction mixture was diluted with 25.0 mL of dichloromethane, followed by washing with 5 mL x 2 of H<sub>2</sub>O. The dichloromethane layer was dried over Na<sub>2</sub>SO<sub>4</sub>, filtered, and the solvent was removed under reduced pressure. The resulting crude product was purified by column chromatography (eluent: PE/AcOEt) to provide the products **3m-q**.

**General procedure C:** To a 5 mL glass tube was charged with secondary aromatic or aliphatic amine (1.0 equiv) and CS<sub>2</sub> (25  $\mu$ L, 0.4 mmol, 2.0 eq.) in 1.5 mL anhydrous DMSO at 0 °C, the tube was sealed with a rubber plug and purged with N<sub>2</sub> for three times. Then *n*-BuLi (0.27 mL, 1.5 M in THF, 0.4 mmol, 2.0 equiv) was added slowly, and warm to 40 °C gradually, stirred for 5h. Finally, aryl thianthrenium salt **2** (0.2 mmol) was added, the reaction was stirred and irradiated with a 420 nm blue LEDs (approximately 2 cm away from the light source) at room temperature (the actual reaction temperature is about 35~40 °C) for 8 h. The reaction mixture quenched with aqueous NH<sub>4</sub>Cl solution, followed by diluting with 25.0 mL of dichloromethane and washing with 5.0 mL x 2 of H<sub>2</sub>O. The dichloromethane layer was dried over Na<sub>2</sub>SO<sub>4</sub>, filtered, and the solvent was removed under reduced pressure. The resulting crude product was purified by column chromatography (eluent: PE/AcOEt) to provide the products **3h** and **3j**.

### Gram-scale reaction

To a 100 mL Three-necked flask equipped with a magnetic stir bar, added *N*-methylaniline **1a** (0.55 mL, 5 mmol), CS<sub>2</sub> (0.63 mL, 10 mmol), and Na<sub>2</sub>CO<sub>3</sub> (0.59 g, 5.5 mmol) in DMSO (50 mL). The mixture was stirred for 1h at 40 °C before the aryl thianthrenium salt **2a** (2.28 g, 5 mmol) was added. Then the Three-necked flask was connected to a peristaltic pump with teflon catheters as shown in **Figure S3**. And the whole unit was purged with N<sub>2</sub> for three times. The reaction was initiated by the peristaltic pump with a flow rate 10.0 mL min<sup>-1</sup> under 420 nm blue LEDs for 5h at room temperature. The reaction mixture was diluted with 300 mL of dichloromethane, followed by washing with 50 mL X 2 of H<sub>2</sub>O. The dichloromethane layer was dried over Na<sub>2</sub>SO<sub>4</sub>, filtered, and the solvent was removed under reduced pressure. The resulting crude product was purified by column chromatography (PE/AcOEt = 70 : 1) to provide the product **3a** as a yellow solid (0.90 g, 66%). Additionally, the thianthrenium (TT) **2a'** was recovered as a white solid (0.97 g, 90%).



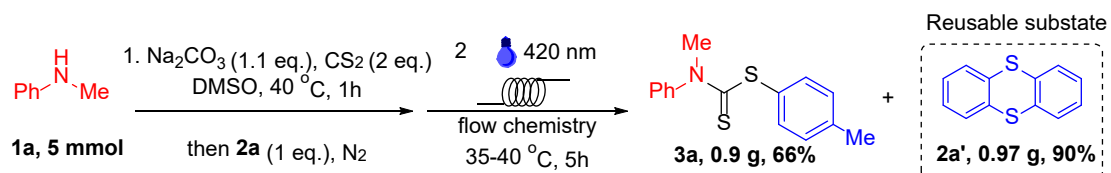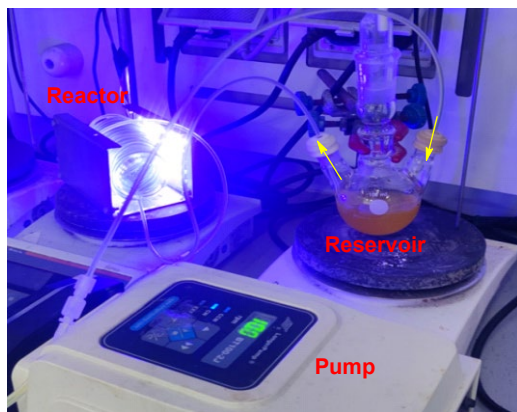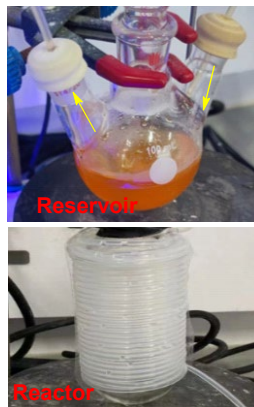

**Figure S3.** Gram-scale experiment

## IV. Experiments of investigations on the mechanism.

### UV-vis absorption spectra

UV/vis absorption spectra were measured in a 1 cm quartz cuvette using a Shimadzu UV-2250 UV/Visible spectrophotometer. Absorption spectra of individual reaction components and mixtures thereof were recorded as shown in **Figure S4**. A bathochromic shift was observed for a mixture of 0.05 M [**1a** + thianthrenium salt **2a** + CS<sub>2</sub> + Et<sub>3</sub>N] in DMSO, which was a visibly intense yellow in color. This indicates the formation of an electron donor-acceptor (EDA) complex (red line 3).

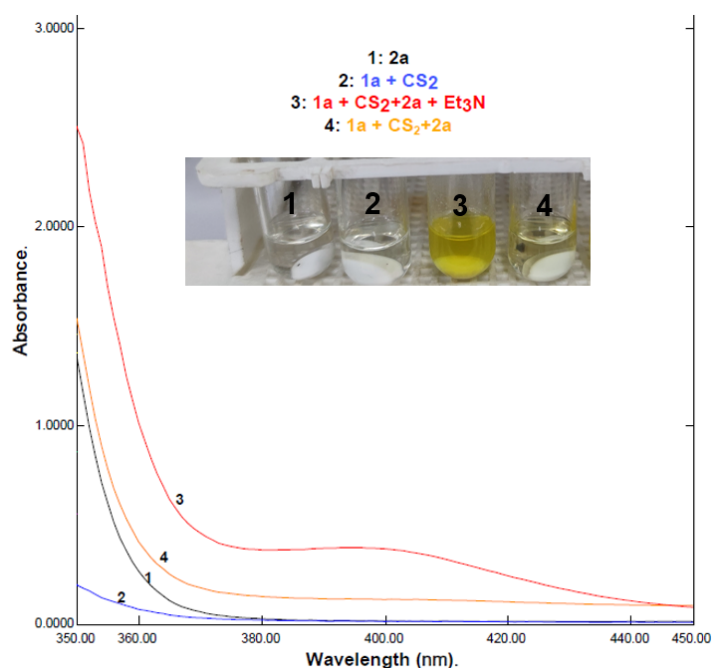

**Figure S4.** UV-vis absorption spectra of various combinations

### Job's plot

Two equimolar (0.02 M) solution of **2a** and **5a** (where **5a** was generated<sup>2</sup> through the reaction of CS<sub>2</sub> and **1a** in the presence of Et<sub>3</sub>N) in DMSO were prepared. Then 7 samples were prepared with specific volumes of the two stock solutions to give a total volume of 4 mL and were analysed by UV/vis spectroscopy. The absorbance values at 420 nm (corresponding to the EDA complex's absorption) were measured (**Table S6**)

and plotted as a function of the molar fraction of thiolate **5a** by using UV/vis spectroscopy (**Figure S5**). A parabolic curve with a maximum absorbance value at 50% mol fraction of thianthrenium salt **2a** was obtained, indicating a 1:1 EDA complex between **2a** and the conjugated base of **5a**.

**Table S6.** The absorbance values of various combinations of **2a** and **5a**

| $V_{2a}$ (mL) | $V_{5a}$ (mL) | $Xi_{2a}$ | $Xi_{5a}$ | $\delta A_{2a}^{420}$ | $\Delta(\delta A_{2a}^{420})$<br>* $Xi_{2a}$ |
|---------------|---------------|-----------|-----------|-----------------------|----------------------------------------------|
| 3.5           | 0.5           | 0.875     | 0.125     | 0.1851                | 0.1620                                       |
| 3.0           | 1.0           | 0.750     | 0.250     | 0.3000                | 0.2250                                       |
| 2.5           | 1.5           | 0.625     | 0.375     | 0.5034                | 0.3146                                       |
| 2.0           | 2.0           | 0.500     | 0.500     | 0.6678                | 0.3339                                       |
| 1.5           | 2.5           | 0.375     | 0.625     | 0.7836                | 0.2939                                       |
| 1.0           | 3.0           | 0.250     | 0.750     | 0.9800                | 0.2450                                       |
| 0.5           | 3.5           | 0.125     | 0.875     | 1.0847                | 0.1356                                       |

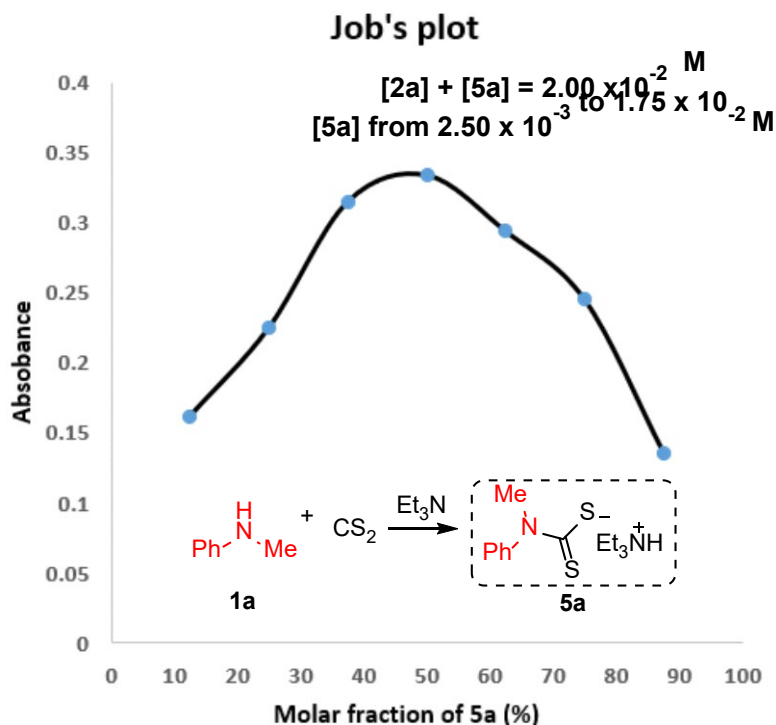

**Figure S5.** Job's plot for ratio between **2a** and **5a**

## Light on/off experiment

To a 5 mL glass tube was charged with *N*-methylaniline **1a** (55  $\mu$ L, 0.5 mmol), CS<sub>2</sub> (63  $\mu$ L, 1.0 mmol), and Na<sub>2</sub>CO<sub>3</sub> (58.3 mg, 0.55 mmol) in 5 mL DMSO for 1 h at 40 °C, then aryl thianthrenium (TT) salt **2a** (228 mg, 0.5 mmol) was added, the tube was sealed with a rubber plug and purged with N<sub>2</sub> for three times. The reaction was stirred and irradiated with a 420 nm blue LEDs (approximately 2 cm away from the light source) at room temperature (the actual reaction temperature is about 35~40 °C) for 1 h at which point a reaction aliquot (0.5 mL) was taken, and diluted with CDCl<sub>3</sub> and analysed by <sup>1</sup>H NMR spectroscopy with anisole as an internal standard. The light was switched off and the mixture was stirred in the dark for 1 h at which point a reaction aliquot (0.5 mL) was taken, and diluted with CDCl<sub>3</sub> and analysed by <sup>1</sup>H NMR spectroscopy with anisole as an internal standard. Repeat the above operations until 7th hour. (**Figure S6**)

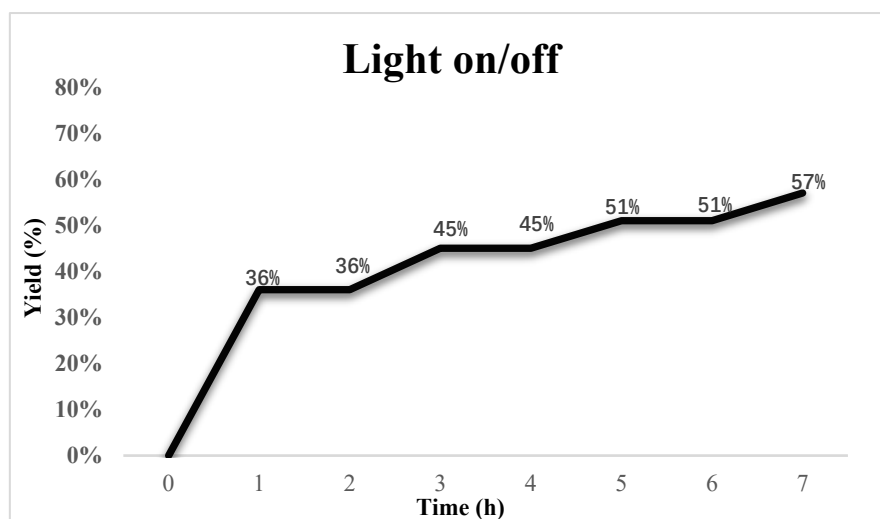

**Figure S6.** Light on/off experiment

## Radical Clock Cyclization Experiment

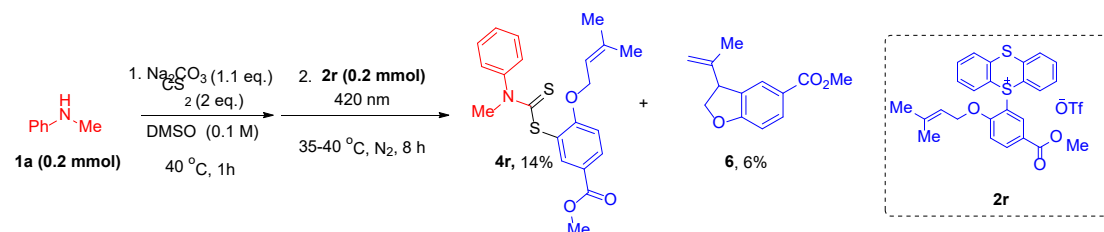

To a 5 mL glass tube was charged with *N*-methylaniline (0.2 mmol),  $\text{CS}_2$  (25  $\mu\text{L}$ , 0.4 mmol, 2.0 eq.), and  $\text{Na}_2\text{CO}_3$  (23.3 mg, 0.22 mmol, 1.1 equiv.) in DMSO (2 mL) for 1 h at 40 °C, then aryl thianthrenium salt **2r** (0.2 mmol) was added, the tube was sealed with a rubber plug and purged with  $\text{N}_2$  for three times. The reaction was stirred and irradiated with a 420 nm blue LEDs (approximately 2 cm away from the light source) at room temperature (the actual reaction temperature is about 35~40 °C) for 8 h. The reaction mixture was diluted with 25.0 mL of dichloromethane, followed by washing with 5 mL of  $\text{H}_2\text{O}$ . The dichloromethane layer was dried over  $\text{Na}_2\text{SO}_4$ , filtered, and the solvent was removed under reduced pressure. The resulting crude product was purified by column chromatography eluting with PE/AcOEt (100:1 to 50:1, v/v) to provide the products **4r** (11.3 mg, 14%) as a brown solid, and **6** (2.6 mg, 6%) as a colorless oil.

## V. Characterization of products

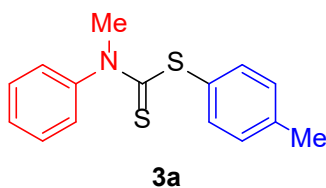

***p*-Tolyl methyl(phenyl)carbamodithioate. (3a)** Following the general **procedure A**, **3a** which was purified by PE/EtOAc (70:1) and obtained as a yellow solid (44 mg, 80%). **Mp** = 119-120 °C. **R<sub>f</sub>** = 0.25 (PE/EtOAc = 50:1). **<sup>1</sup>H NMR** (400 MHz, Chloroform-*d*) δ 7.54 – 7.44 (m, 3H), 7.40 – 7.34 (m, 2H), 7.29 (d, *J* = 8.1 Hz, 2H), 7.21 (d, *J* = 8.1 Hz, 2H), 3.78 (s, 3H), 2.38 (s, 3H). **<sup>13</sup>C NMR** (101 MHz, Chloroform-*d*) δ 200.20, 145.03, 140.20, 136.63 (2C), 129.93 (2C), 129.81 (2C), 129.19, 129.11, 126.97 (2C), 46.57, 21.52. **HRMS m/z** (ESI) calcd for C<sub>15</sub>H<sub>15</sub>NNaS<sub>2</sub> [M + Na]<sup>+</sup> 296.0538 ; found 296.0528.

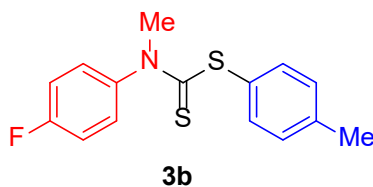

***p*-Tolyl (4-fluorophenyl) (methyl) carbamodithioate. (3b)** Following the general **procedure A**, **3b** which was purified by PE/EtOAc (70:1) and obtained as a yellow solid (40 mg, 69%). **Mp** = 114-115 °C. **R<sub>f</sub>** = 0.25 (PE/EtOAc = 50:1). **<sup>1</sup>H NMR** (400 MHz, Chloroform-*d*) δ 7.41 – 7.35 (m, 2H), 7.31 (d, *J* = 8.2 Hz, 2H), 7.28 – 7.18 (m, 4H), 3.79 (s, 3H), 2.41 (s, 3H). **<sup>13</sup>C NMR** (101 MHz, Chloroform-*d*) δ 200.64, 162.49 (d, *J* = 249.6 Hz), 140.91, 140.34, 136.59 (2C), 130.00 (2C), 128.92 (d, *J* = 9.1 Hz, 3C), 116.82 (d, *J* = 22.9 Hz, 2C), 46.59, 21.53. **HRMS m/z** (ESI) calcd for C<sub>15</sub>H<sub>14</sub>FNNaS<sub>2</sub> [M + Na]<sup>+</sup> 314.0444 ; found 314.0444.

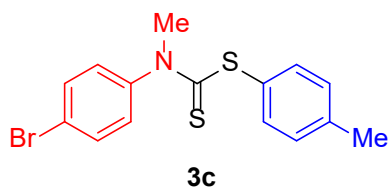

***p*-Tolyl (4-bromophenyl) (methyl) carbamodithioate. (3c)** Following the general **procedure A**, **3c** which was purified by PE/EtOAc (70:1) and obtained as a yellow solid (39 mg, 55%). **Mp** = 127-128 °C. **R<sub>f</sub>** = 0.20 (PE/EtOAc = 50:1). **<sup>1</sup>H NMR** (400 MHz, Chloroform-*d*) δ 7.72 – 7.61 (m, 2H), 7.34 – 7.21 (m, 6H), 3.78 (s, 3H), 2.41 (s, 3H). **<sup>13</sup>C NMR** (101 MHz, Chloroform-*d*) δ 200.31, 143.94, 140.39, 136.58 (2C), 133.08 (2C), 130.02 (2C), 128.83, 128.74 (2C), 123.08, 46.35, 21.53. **HRMS m/z** (ESI) calcd for C<sub>15</sub>H<sub>15</sub>BrNS<sub>2</sub> [M + H]<sup>+</sup> 351.9824 ; found 351.9824.

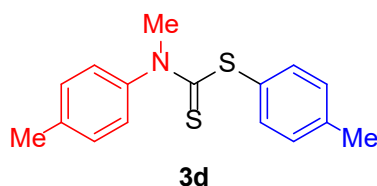

***p*-Tolyl methyl (*p*-tolyl) carbamodithioate. (3d)** Following the general **procedure A**, **3d** which was purified by PE/EtOAc (70:1) and obtained as a yellow solid (40 mg, 70%). **Mp** = 129-130 °C. **R<sub>f</sub>** = 0.20 (PE/EtOAc = 50:1). **<sup>1</sup>H NMR** (400 MHz, Chloroform-*d*) δ 7.36 – 7.30 (m, 4H), 7.26 (m, 4H), 3.79 (s, 3H), 2.46 (s, 3H), 2.41 (s, 3H). **<sup>13</sup>C NMR** (101 MHz, Chloroform-*d*) δ 200.22, 142.46, 140.15, 139.28, 136.64 (2C), 130.41 (2C), 129.91 (2C), 129.31, 126.63 (2C), 46.66, 21.53, 21.33. **HRMS m/z** (ESI) calcd for C<sub>16</sub>H<sub>17</sub>NNaS<sub>2</sub> [M + Na]<sup>+</sup> 310.0695 ; found 310.0688.

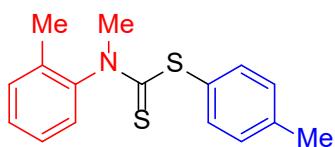

**3e**

***p*-Tolyl methyl (*o*-tolyl) carbamodithioate. (3e)** Following the general **procedure A**, **3e** which was purified by PE/EtOAc (70:1) and obtained as a yellow solid (30 mg, 52%). **Mp** = 131-132 °C. **R<sub>f</sub>** = 0.25 (PE/EtOAc = 50:1). **<sup>1</sup>H NMR** (400 MHz, Chloroform-*d*) δ 7.44 – 7.27 (m, 6H), 7.25 (d, *J* = 8.0 Hz, 2H), 3.74 (s, 3H), 2.41 (s, 3H), 2.37 (s, 3H). **<sup>13</sup>C NMR** (101 MHz, Chloroform-*d*) δ 200.13, 143.73, 140.19, 136.60 (2C), 135.26, 131.60, 129.94 (2C), 129.62, 129.05, 127.52, 127.19, 45.08, 21.55, 17.49. **HRMS m/z** (ESI) calcd for C<sub>16</sub>H<sub>17</sub>NNaS<sub>2</sub> [M + Na]<sup>+</sup> 310.0695 ; found 310.0691.

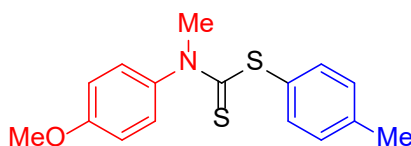

**3f**

***p*-Tolyl (4-methoxyphenyl) (methyl) carbamodithioate. (3f)** Following the general **procedure A**, **3f** which was purified by PE/EtOAc (30:1) and obtained as a yellow solid (36 mg, 59%). **Mp** = 107-108 °C. **R<sub>f</sub>** = 0.35 (PE/EtOAc = 10:1). **<sup>1</sup>H NMR** (400 MHz, Chloroform-*d*) δ 7.34 – 7.29 (m, 4H), 7.24 (d, *J* = 7.8 Hz, 2H), 7.02 (d, *J* = 8.9 Hz, 2H), 3.89 (s, 3H), 3.79 (s, 3H), 2.41 (s, 3H). **<sup>13</sup>C NMR** (101 MHz, Chloroform-*d*) δ 200.66, 159.84, 140.14, 137.72, 136.62 (2C), 129.92 (2C), 129.44, 128.07 (2C), 114.85 (2C), 55.57, 46.78, 21.53. **HRMS m/z** (ESI) calcd for C<sub>16</sub>H<sub>17</sub>NNaOS<sub>2</sub> [M + Na]<sup>+</sup> 326.0644 ; found 326.0643.



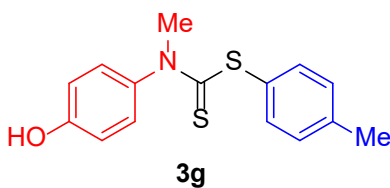

***p*-Tolyl (4-hydroxyphenyl) (methyl) carbamodithioate. (3g)** Following the general **procedure A**, **3g** which was purified by PE/EtOAc (20:1) and obtained as a yellow solid (31 mg, 54%). **Mp** = 170-171 °C. **R<sub>f</sub>** = 0.10 (PE/EtOAc = 10:1). **<sup>1</sup>H NMR** (400 MHz, Chloroform-*d*) δ 7.36 – 7.18 (m, 6H), 6.95 (d, *J* = 8.4 Hz, 2H), 5.43 (s, 1H), 3.78 (s, 3H), 2.40 (s, 3H). **<sup>13</sup>C NMR** (101 MHz, Chloroform-*d*) δ 200.83, 156.13, 140.22, 136.61 (2C), 129.96 (2C), 128.76, 128.26 (2C), 127.71, 116.46 (2C), 46.82, 21.54. **HRMS m/z** (ESI) calcd for C<sub>15</sub>H<sub>16</sub>NOS<sub>2</sub> [M + H]<sup>+</sup> 290.0688 ; found 299.0664.

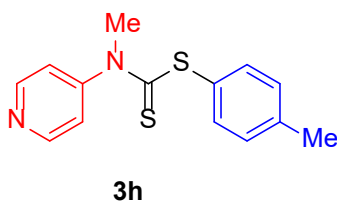

***p*-Tolyl methyl (pyridin-4-yl) carbamodithioate. (3h)** Following the general **procedure C**, **3h** which was purified by PE/EtOAc (2:1) and obtained as a yellow solid (27 mg, 50%). **Mp** = 155-157 °C. **R<sub>f</sub>** = 0.20 (PE/EtOAc = 2:1). **<sup>1</sup>H NMR** (400 MHz, Chloroform-*d*) δ 8.81 (d, *J* = 5.3 Hz, 2H), 7.38 (d, *J* = 5.1 Hz, 2H), 7.31 (d, *J* = 8.2 Hz, 2H), 7.26 (d, *J* = 8.1 Hz, 2H), 3.79 (s, 3H), 2.41 (s, 3H). **<sup>13</sup>C NMR** (101 MHz, Chloroform-*d*) δ 200.00, 152.40, 151.58 (2C), 140.68, 136.55 (2C), 130.15 (2C), 128.18, 121.89 (2C), 45.80, 21.56. **HRMS m/z** (ESI) calcd for C<sub>14</sub>H<sub>14</sub>N<sub>2</sub>NaS<sub>2</sub> [M + Na]<sup>+</sup> 297.0491 ; found 297.0500.

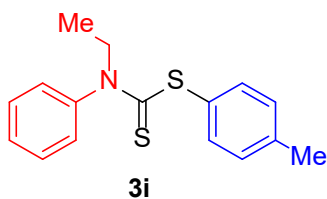

***p*-Tolyl ethyl (phenyl) carbamodithioate. (3i)** Following the general **procedure A**, **3i** which was purified by PE/EtOAc (70:1) and obtained as a yellow solid (35 mg, 61%). **Mp** = 128-129 °C. **R<sub>f</sub>** = 0.25 (PE/EtOAc = 50:1). **<sup>1</sup>H NMR** (400 MHz, Chloroform-*d*) δ 7.58 – 7.47 (m, 3H), 7.39 – 7.35 (m, 2H), 7.32 (d, *J* = 8.2 Hz, 2H), 7.24 (d, *J* = 8.0 Hz, 2H), 4.39 (q, *J* = 7.1 Hz, 2H), 2.41 (s, 3H), 1.31 (t, *J* = 7.1 Hz, 3H). **<sup>13</sup>C NMR** (101 MHz, Chloroform-*d*) δ 199.71, 143.18, 140.14, 136.69 (2C), 129.89 (2C), 129.74 (2C), 129.20, 129.15, 128.05 (2C), 53.09, 21.53, 11.92. **HRMS m/z** (ESI) calcd for C<sub>16</sub>H<sub>18</sub>NS<sub>2</sub> [M + H]<sup>+</sup> 288.0875 ; found 288.0868.

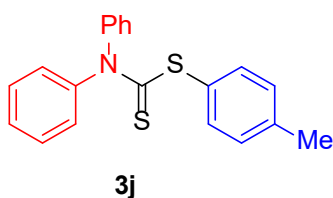

***p*-Tolyl diphenylcarbamodithioate. (3j)** Following the general **procedure C**, **3j** which was purified by PE/EtOAc (70:1) and obtained as a yellow solid (17 mg, 25%). **Mp** = 204-205 °C. **R<sub>f</sub>** = 0.30 (PE/EtOAc = 50:1). **<sup>1</sup>H NMR** (400 MHz, Chloroform-*d*) δ 7.54 – 7.48 (m, 4H), 7.46 (t, *J* = 7.6 Hz, 4H), 7.41 – 7.33 (m, 4H), 7.25 (d, *J* = 7.9 Hz, 2H), 2.41 (s, 3H). **<sup>13</sup>C NMR** (101 MHz, Chloroform-*d*) δ 202.49, 145.44 (2C), 140.28, 136.53 (2C), 130.00 (2C), 129.62 (4C), 128.90, 128.32 (2C), 128.01 (4C), 21.56. **HRMS m/z** (ESI) calcd for C<sub>20</sub>H<sub>18</sub>NS<sub>2</sub> [M + H]<sup>+</sup> 336.0875 ; found 336.0885.

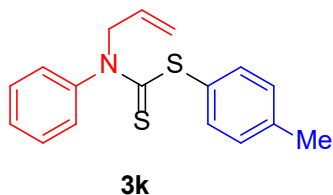

***p*-Tolyl allyl (phenyl) carbamodithioate. (3k)** Following the general **procedure A**, **3k** which was purified by PE/EtOAc (70:1) and obtained as a yellow solid (21 mg,

35%). **Mp** = 154-155 °C. **R<sub>f</sub>** = 0.25 (PE/EtOAc = 50:1). **<sup>1</sup>H NMR** (400 MHz, Chloroform-*d*) δ 7.56 – 7.46 (m, 3H), 7.39 – 7.29 (m, 4H), 7.24 (d, *J* = 7.9 Hz, 2H), 6.05 (ddt, *J* = 16.7, 10.2, 6.4 Hz, 1H), 5.23 (d, *J* = 10.2 Hz, 1H), 5.20 – 5.11 (m, 1H), 4.94 (d, *J* = 6.4 Hz, 2H), 2.41 (s, 3H). **<sup>13</sup>C NMR** (101 MHz, Chloroform-*d*) δ 200.59, 140.22, 136.64 (2C), 131.01, 129.92 (2C), 129.61 (2C), 129.31, 129.24, 129.09, 128.08 (2C), 119.54, 60.70, 21.53. **HRMS m/z** (ESI) calcd for C<sub>17</sub>H<sub>18</sub>NS<sub>2</sub>[M + H]<sup>+</sup> 300.0875 ; found 300.0876.

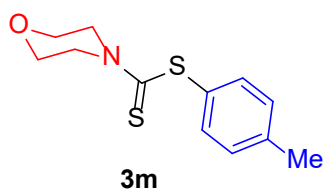

***p*-Tolyl morpholine-4-carbodithioate. (3m)** Following the general **procedure B**, **3m** which was purified by PE/EtOAc (10:1) and obtained as a yellow solid (36 mg, 71%). **Mp** = 136-137 °C. **R<sub>f</sub>** = 0.15 (PE/EtOAc = 10:1). **<sup>1</sup>H NMR** (400 MHz, Chloroform-*d*) δ 7.38 (d, *J* = 8.1 Hz, 2H), 7.29 (d, *J* = 8.0 Hz, 2H), 4.46 – 3.98 (m, 4H), 3.90 – 3.79 (m, 4H), 2.44 (s, 3H). **<sup>13</sup>C NMR** (101 MHz, Chloroform-*d*) δ 198.57, 140.63, 136.92 (2C), 130.10 (2C), 127.41, 66.32 (br, 2C), 51.26 (br, 2C), 21.57. The spectra data are matched with those reported. <sup>[3]</sup>

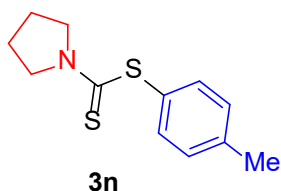

***p*-Tolyl pyrrolidine-1-carbodithioate. (3n)** Following the general **procedure B**, **3n** which was purified by PE/EtOAc (10:1) and obtained as a yellow solid (31 mg, 65%). **Mp** = 115-116 °C. **R<sub>f</sub>** = 0.30 (PE/EtOAc = 10:1). **<sup>1</sup>H NMR** (400 MHz, Chloroform-*d*) δ 7.41 (d, *J* = 8.1 Hz, 2H), 7.28 (d, *J* = 7.9 Hz, 2H), 3.96 (t, *J* = 7.0 Hz, 2H), 3.82 (t, *J*

= 6.9 Hz, 2H), 2.43 (s, 3H), 2.15 (m, 2H), 2.02 (m, 2H).  $^{13}\text{C}$  NMR (101 MHz, Chloroform-*d*)  $\delta$  193.58, 140.40, 136.77 (2C), 130.03 (2C), 127.70, 55.37, 51.04, 26.38, 24.42, 21.58. The spectra data are matched with those reported <sup>[3]</sup>

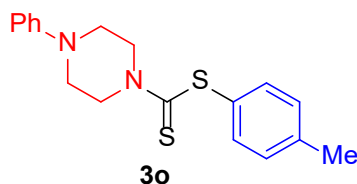

***p*-Tolyl 4-phenylpiperazine-1-carbodithioate. (3o)** Following the general **procedure B**, **3o** which was purified by PE/EtOAc (15:1) and obtained as a yellow solid (30 mg, 46%). **Mp** = 168-169 °C. **R<sub>f</sub>** = 0.4 (PE/EtOAc = 10:1).  $^1\text{H}$  NMR (400 MHz, Chloroform-*d*)  $\delta$  7.41 (d,  $J$  = 8.1 Hz, 2H), 7.38 – 7.27 (m, 4H), 6.98 (d,  $J$  = 7.5 Hz, 3H), 4.40 (d,  $J$  = 105.2 Hz, 4H), 3.38 (s, 4H), 2.45 (s, 3H).  $^{13}\text{C}$  NMR (101 MHz, Chloroform-*d*)  $\delta$  198.16, 150.31, 140.60, 136.95 (2C), 130.11 (2C), 129.38 (2C), 127.61, 120.64, 116.40 (2C), 51.21(br), 50.24 (br), 48.84, 21.59. **HRMS**  $m/z$  (ESI) calcd for  $\text{C}_{18}\text{H}_{21}\text{N}_2\text{S}_2$   $[\text{M} + \text{H}]^+$  329.1141 ; found 329.1150.

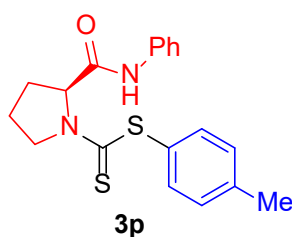

***p*-Tolyl (S)-2-(phenylcarbamoyl) pyrrolidine-1-carbodithioate. (3p)** Following the general **procedure B**, **3p** which was purified by PE/EtOAc (4:1) and obtained as a yellow solid (23 mg, 32%). **Mp** = 310-312 °C. **R<sub>f</sub>** = 0.2 (PE/EtOAc = 4:1).  $^1\text{H}$  NMR (400 MHz, Chloroform-*d*)  $\delta$  9.52 (s, 1H), 7.53 (d,  $J$  = 8.0 Hz, 2H), 7.42 (d,  $J$  = 7.8 Hz, 2H), 7.35 – 7.26 (m, 4H), 7.11 (t,  $J$  = 7.4 Hz, 1H), 5.50 (d,  $J$  = 7.6 Hz, 1H), 3.95 (d,  $J$

= 9.5 Hz, 2H), 2.63 (dd,  $J = 12.5, 6.8$  Hz, 1H), 2.45 (m, 4H), 2.25 (m, 1H), 2.07 (m, 1H).  $^{13}\text{C}$  NMR (101 MHz, Chloroform- $d$ )  $\delta$  198.01, 167.32, 140.89, 137.93, 136.70 (2C), 130.19 (2C), 128.94 (2C), 127.19, 124.32, 120.12 (2C), 68.13, 51.77, 27.67, 25.21, 21.60. HRMS  $m/z$  (ESI) calcd for  $\text{C}_{19}\text{H}_{21}\text{N}_2\text{OS}_2$   $[\text{M} + \text{H}]^+$  357.1090 ; found 357.1095.

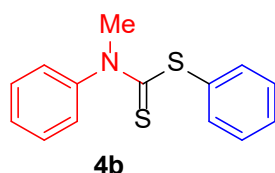

**Phenyl methyl(phenyl)carbamodithioate. (4b)** Following the general procedure A, **4b** which was purified by PE/EtOAc (70:1) and obtained as a yellow solid (31 mg, 60%). **Mp** = 90-91 °C. **R<sub>f</sub>** = 0.3 (PE/EtOAc = 50:1).  $^1\text{H}$  NMR (400 MHz, Chloroform- $d$ )  $\delta$  7.58 – 7.37 (m, 10H), 3.82 (s, 3H).  $^{13}\text{C}$  NMR (101 MHz, Chloroform- $d$ )  $\delta$  199.66, 144.94, 136.82 (2C), 132.60, 129.95, 129.87 (2C), 129.20, 129.06 (2C), 126.97 (2C), 46.59. HRMS  $m/z$  (ESI) calcd for  $\text{C}_{14}\text{H}_{14}\text{NS}_2$   $[\text{M} + \text{H}]^+$  260.0562 ; found 260.0554.

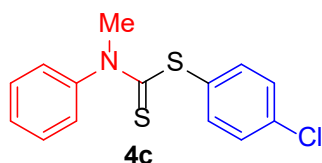

**4-Chlorophenyl methyl(phenyl)carbamodithioate. (4c)** Following the general procedure A, **4c** which was purified by PE/EtOAc (50:1) and obtained as a yellow solid (33 mg, 57%). **Mp** = 129-130 °C. **R<sub>f</sub>** = 0.4 (PE/EtOAc = 10:1).  $^1\text{H}$  NMR (400 MHz, Chloroform- $d$ )  $\delta$  7.57 – 7.49 (m, 3H), 7.42 – 7.32 (m, 6H), 3.81 (s, 3H).  $^{13}\text{C}$  NMR (101 MHz, Chloroform- $d$ )  $\delta$  198.77, 144.78, 138.01 (2C), 136.42, 131.04, 129.89 (2C), 129.33 (2C), 129.30, 126.93 (2C), 46.60. HRMS  $m/z$  (ESI) calcd for  $\text{C}_{14}\text{H}_{13}\text{NClS}_2$   $[\text{M} + \text{H}]^+$  294.0172 ; found 294.0166.

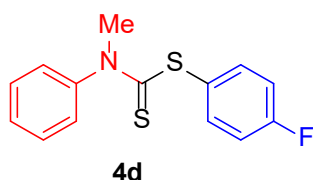

**4-Fluorophenyl methyl(phenyl)carbamdithioate. (4d)** Following the general procedure A, **4d** which was purified by PE/EtOAc (50:1) and obtained as a yellow solid (32 mg, 58%). **Mp** = 102-103 °C. **R<sub>f</sub>** = 0.3 (PE/EtOAc = 50:1). **<sup>1</sup>H NMR** (400 MHz, Chloroform-*d*) δ 7.59 – 7.47 (m, 3H), 7.44 – 7.36 (m, 4H), 7.12 (t, *J* = 8.7 Hz, 2H), 3.81 (s, 3H). **<sup>13</sup>C NMR** (101 MHz, Chloroform-*d*) δ 199.44 (d, *J* = 2.1 Hz), 163.85 (d, *J* = 250.9 Hz), 144.77, 138.87 (d, *J* = 8.7 Hz, 2C), 129.89 (2C), 129.29, 128.04 (d, *J* = 3.3 Hz), 126.94 (2C), 116.32 (d, *J* = 22.1 Hz, 2C), 46.68. **HRMS m/z** (ESI) calcd for C<sub>14</sub>H<sub>13</sub>FNS<sub>2</sub> [M + H]<sup>+</sup> 278.0468 ; found 278.0471.

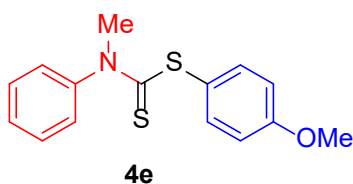

**4-Methoxyphenyl methyl(phenyl)carbamdithioate. (4e)** Following the general procedure A, **4e** which was purified by PE/EtOAc (20:1) and obtained as a yellow solid (35 mg, 60%). **Mp** = 125-126 °C. **R<sub>f</sub>** = 0.3 (PE/EtOAc = 10:1). **<sup>1</sup>H NMR** (400 MHz, Chloroform-*d*) δ 7.59 – 7.46 (m, 3H), 7.42 – 7.37 (m, 2H), 7.36 – 7.31 (m, 2H), 6.99 – 6.90 (m, 2H), 3.85 (s, 3H), 3.81 (s, 3H). **<sup>13</sup>C NMR** (101 MHz, Chloroform-*d*) δ 200.80, 160.98, 144.99 (2C), 138.25, 129.81 (2C), 129.11, 126.96 (2C), 123.48, 114.63 (2C), 55.28, 46.63. **HRMS m/z** (ESI) calcd for C<sub>15</sub>H<sub>16</sub>NOS<sub>2</sub> [M + H]<sup>+</sup> 290.0668 ; found 290.0661.

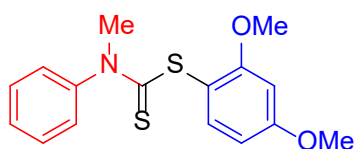

**4f**

**2, 4-Dimethoxyphenyl methyl(phenyl)carbamodithioate. (4f)** Following the general **procedure A**, **4f** which was purified by PE/EtOAc (10:1) and obtained as a yellow solid (35 mg, 55%). **Mp** = 142-143 °C. **R<sub>f</sub>** = 0.2 (PE/EtOAc = 10:1). **<sup>1</sup>H NMR** (400 MHz, Chloroform-*d*) δ 7.56 – 7.49 (m, 2H), 7.49 – 7.40 (m, 3H), 7.27 (dd, *J* = 9.2, 1.5 Hz, 1H), 6.59 – 6.52 (m, 2H), 3.86 (s, 3H), 3.84 (s, 3H), 3.81 (s, 3H). **<sup>13</sup>C NMR** (101 MHz, Chloroform-*d*) δ 200.09, 163.18, 161.49, 145.22, 139.36, 129.79 (2C), 128.95, 126.98 (2C), 112.23, 105.32, 99.38, 56.18, 55.41, 46.66. **HRMS m/z** (ESI) calcd for C<sub>16</sub>H<sub>18</sub>NO<sub>2</sub>S<sub>2</sub> [M + H]<sup>+</sup> 320.0773 ; found 320.0778.

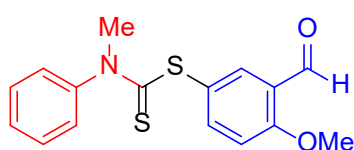

**4g**

**3-Formyl-4-methoxyphenyl methyl(phenyl)carbamodithioate. (4g)** Following the general **procedure A**, **4g** which was purified by PE/EtOAc (10:1) and obtained as a yellow solid (34 mg, 54%). **Mp** = 139-141 °C. **R<sub>f</sub>** = 0.1 (PE/EtOAc = 10:1). **<sup>1</sup>H NMR** (400 MHz, Chloroform-*d*) δ 10.44 (s, 1H), 7.85 (d, *J* = 2.4 Hz, 1H), 7.60 (dd, *J* = 8.7, 2.4 Hz, 1H), 7.57 – 7.46 (m, 3H), 7.39 (d, *J* = 6.8 Hz, 2H), 7.06 (d, *J* = 8.7 Hz, 1H), 3.99 (s, 3H), 3.80 (s, 3H). **<sup>13</sup>C NMR** (101 MHz, Chloroform-*d*) δ 199.45, 188.77, 162.76, 144.77, 144.43, 137.11, 129.88 (2C), 129.28, 126.93 (2C), 125.27, 124.61, 112.42, 55.90, 46.66. **HRMS m/z** (ESI) calcd for C<sub>16</sub>H<sub>16</sub>NO<sub>2</sub>S<sub>2</sub> [M + H]<sup>+</sup> 318.0617 ; found 318.0612.

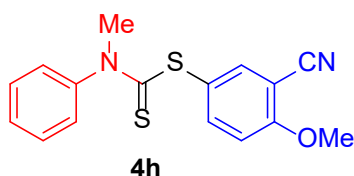

**3-Cyano-4-methoxyphenyl methyl(phenyl)carbamodithioate. (4h)** Following the general **procedure A**, **4h** which was purified by PE/EtOAc (10:1) and obtained as a yellow solid (40 mg, 64%). **Mp** = 145-146 °C. **R<sub>f</sub>** = 0.1 (PE/EtOAc = 10:1). **<sup>1</sup>H NMR** (400 MHz, Chloroform-*d*) δ 7.61 – 7.48 (m, 5H), 7.41 – 7.35 (m, 2H), 7.02 (d, *J* = 8.7 Hz, 1H), 3.99 (s, 3H), 3.80 (s, 3H). **<sup>13</sup>C NMR** (101 MHz, Chloroform-*d*) δ 198.64, 162.28, 144.54, 143.17, 142.00, 129.95 (2C), 129.44, 126.89 (2C), 124.64, 115.61, 111.82, 102.76, 56.31, 46.75. **HRMS m/z** (ESI) calcd for C<sub>16</sub>H<sub>15</sub>N<sub>2</sub>OS<sub>2</sub> [M + H]<sup>+</sup> 315.0620 ; found 315.0622.

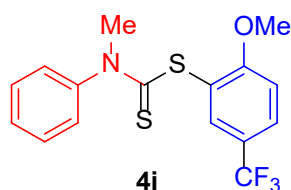

**2-Methoxy-5-(trifluoromethyl)phenyl methyl(phenyl)carbamodithioate. (4i)** Following the general **procedure A**, **4i** which was purified by PE/EtOAc (10:1) and obtained as a yellow solid (30 mg, 42%). **Mp** = 121-122 °C. **R<sub>f</sub>** = 0.15 (PE/EtOAc = 10:1). **<sup>1</sup>H NMR** (400 MHz, Chloroform-*d*) δ 7.71 (dd, *J* = 8.2, 1.9 Hz, 1H), 7.63 (d, *J* = 2.4 Hz, 1H), 7.58 – 7.40 (m, 5H), 7.04 (d, *J* = 8.7 Hz, 1H), 3.92 (s, 3H), 3.81 (s, 3H). **<sup>13</sup>C NMR** (101 MHz, Chloroform-*d*) δ 197.31, 162.72, 144.95, 135.63 (q, *J* = 3.7 Hz), 129.88 (2C), 129.44 (q, *J* = 3.6 Hz), 129.22, 126.92 (2C), 123.37 (q, *J* = 287.1 Hz), 123.15 (d, *J* = 33.2 Hz), 121.71, 111.47, 56.45, 46.56. **HRMS m/z** (ESI) calcd for C<sub>16</sub>H<sub>15</sub>F<sub>3</sub>NOS<sub>2</sub> [M + H]<sup>+</sup> 358.0542 ; found 358.0545.



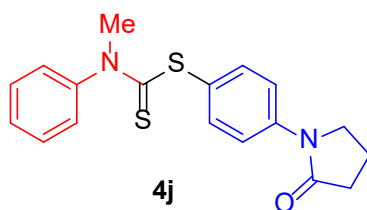

**4-(2-Oxopyrrolidin-1-yl)phenyl methyl(phenyl)carbamodithioate. (4j)** Following the general **procedure A**, **4j** which was purified by PE/EtOAc (3:1) and obtained as a yellow solid (40 mg, 59%). **Mp** = 175-176 °C. **R<sub>f</sub>** = 0.1 (PE/EtOAc = 4:1). **<sup>1</sup>H NMR** (400 MHz, Chloroform-*d*) δ 7.78 – 7.70 (m, 2H), 7.58 – 7.46 (m, 3H), 7.40 (t, *J* = 7.5 Hz, 4H), 3.90 (t, *J* = 7.0 Hz, 2H), 3.81 (s, 3H), 2.63 (t, *J* = 8.1 Hz, 2H), 2.24 – 2.12 (m, 2H). **<sup>13</sup>C NMR** (101 MHz, Chloroform-*d*) δ 199.92, 174.46, 144.93, 140.89, 137.37 (2C), 129.84 (2C), 129.18, 127.43, 126.95 (2C), 119.59 (2C), 48.50, 46.58, 32.95, 17.96. **HRMS m/z** (ESI) calcd for C<sub>18</sub>H<sub>19</sub>N<sub>2</sub>OS<sub>2</sub> [M + H]<sup>+</sup> 343.0933 ; found 343.0935.

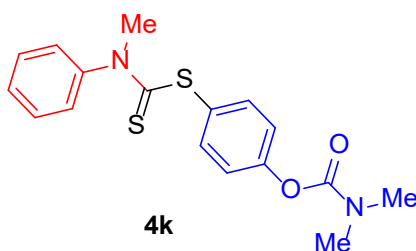

**4-((Methyl(phenyl)carbamothioyl)thio)phenyl dimethylcarbamate. (4k)** Following the general **procedure A**, **4k** which was purified by PE/EtOAc (5:1) and obtained as a yellow solid (46 mg, 67%). **Mp** = 144-146 °C. **R<sub>f</sub>** = 0.3 (PE/EtOAc = 4:1). **<sup>1</sup>H NMR** (400 MHz, Chloroform-*d*) δ 7.58 – 7.44 (m, 3H), 7.44 – 7.35 (m, 4H), 7.19 (d, *J* = 8.7 Hz, 2H), 3.80 (s, 3H), 3.11 (s, 3H), 3.03 (s, 3H). **<sup>13</sup>C NMR** (101 MHz, Chloroform-*d*) δ 199.66, 154.32, 152.91, 144.88, 137.87 (2C), 129.86 (2C), 129.20, 128.86, 126.93 (2C), 122.29 (2C), 46.60, 36.72, 36.50. **HRMS m/z** (ESI) calcd for C<sub>17</sub>H<sub>18</sub>N<sub>2</sub>NaO<sub>2</sub>S<sub>2</sub> [M + Na]<sup>+</sup> 369.0702 ; found 369.0705.

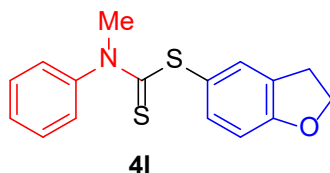

**2, 3-Dihydrobenzofuran-5-yl methyl(phenyl)carbamodithioate. (4l)** Following the general **procedure A**, **4l** which was purified by PE/EtOAc (50:1) and obtained as a yellow solid (40 mg, 66%). **Mp** = 158-159 °C. **R<sub>f</sub>** = 0.1 (PE/EtOAc = 50:1). <sup>1</sup>H NMR (400 MHz, Chloroform-*d*) δ 7.57 – 7.45 (m, 3H), 7.38 (dd, *J* = 7.0, 1.7 Hz, 2H), 7.22 (s, 1H), 7.16 (d, *J* = 8.2 Hz, 1H), 6.82 (d, *J* = 8.2 Hz, 1H), 4.64 (t, *J* = 8.8 Hz, 2H), 3.81 (s, 3H), 3.25 (t, *J* = 8.7 Hz, 2H). <sup>13</sup>C NMR (101 MHz, Chloroform-*d*) δ 201.26, 161.83, 145.01, 137.27, 133.52, 129.80 (2C), 129.08, 128.20, 126.94 (2C), 122.92, 110.03, 71.77, 46.65, 29.41. **HRMS m/z** (ESI) calcd for C<sub>16</sub>H<sub>16</sub>NOS<sub>2</sub> [M + H]<sup>+</sup> 302.0668 ; found 302.0660.

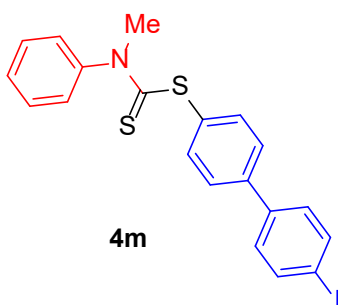

**4'-Iodo-[1,1'-biphenyl]-4-yl methyl(phenyl)carbamodithioate. (4m)** Following the general **procedure A**, **4m** which was purified by PE/EtOAc (50:1) and obtained as a yellow solid (61 mg, 66%). **Mp** = 160-161 °C. **R<sub>f</sub>** = 0.3 (PE/EtOAc = 50:1). <sup>1</sup>H NMR (400 MHz, Chloroform-*d*) δ 7.79 (d, *J* = 8.4 Hz, 2H), 7.61 (d, *J* = 8.3 Hz, 2H), 7.58 – 7.47 (m, 5H), 7.42 (d, *J* = 7.2 Hz, 2H), 7.38 (d, *J* = 8.4 Hz, 2H), 3.83 (s, 3H). <sup>13</sup>C NMR (101 MHz, Chloroform-*d*) δ 199.26, 144.94, 141.41, 139.69, 137.92 (2C), 137.21 (2C), 131.94, 129.88 (2C), 129.25, 129.07 (2C), 127.43 (2C), 126.96 (2C), 93.74, 46.60. **HRMS m/z** (ESI) calcd for C<sub>20</sub>H<sub>17</sub>INS<sub>2</sub> [M + H]<sup>+</sup> 461.9842 ; found 461.9851.

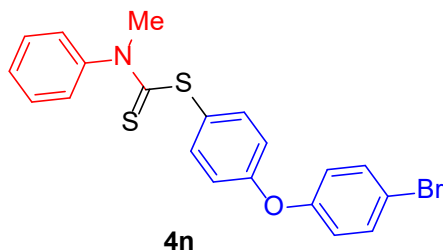

**4-(4-Bromophenoxy)phenyl methyl(phenyl)carbamodithioate. (4n)** Following the general **procedure A**, **4n** which was purified by PE/EtOAc (50:1) and obtained as a yellow solid (43 mg, 50%). **Mp** = 140-141 °C. **R<sub>f</sub>** = 0.3 (PE/EtOAc = 50:1). <sup>1</sup>**H NMR** (400 MHz, Chloroform-*d*) δ 7.61 – 7.45 (m, 5H), 7.39 (dd, *J* = 10.8, 8.0 Hz, 4H), 7.00 (dd, *J* = 8.8, 7.1 Hz, 4H), 3.82 (s, 3H). <sup>13</sup>**C NMR** (101 MHz, Chloroform-*d*) δ 199.86, 158.73, 155.24, 144.86, 138.56 (2C), 132.93 (2C), 129.88 (2C), 129.23, 126.96 (2C), 126.59, 121.63 (2C), 118.53 (2C), 116.74, 46.69. **HRMS m/z** (ESI) calcd for C<sub>20</sub>H<sub>17</sub>BrNOS<sub>2</sub> [M + H]<sup>+</sup> 429.9929 ; found 429.9933.

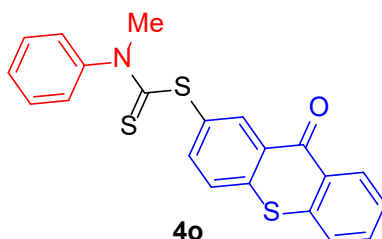

**9-Oxo-9H-thioxanthen-2-yl methyl(phenyl)carbamodithioate. (4o)** Following the general **procedure A**, **4o** which was purified by PE/EtOAc (10:1) and obtained as a yellow solid (25 mg, 32%). **Mp** = 206-207 °C. **R<sub>f</sub>** = 0.3 (PE/EtOAc = 10:1). <sup>1</sup>**H NMR** (400 MHz, Chloroform-*d*) δ 8.65 – 8.58 (m, 2H), 7.70 – 7.46 (m, 8H), 7.45 – 7.41 (m, 2H), 3.82 (s, 3H). <sup>13</sup>**C NMR** (101 MHz, Chloroform-*d*) δ 198.48, 179.18, 144.78, 140.13, 139.20, 137.68, 136.78, 132.46, 131.01, 129.94, 129.92 (2C), 129.61, 129.35, 129.22, 126.97 (2C), 126.61, 126.53, 126.08, 46.56. **HRMS m/z** (ESI) calcd for C<sub>21</sub>H<sub>16</sub>NOS<sub>3</sub> [M + H]<sup>+</sup> 394.0389 ; found 394.0390.

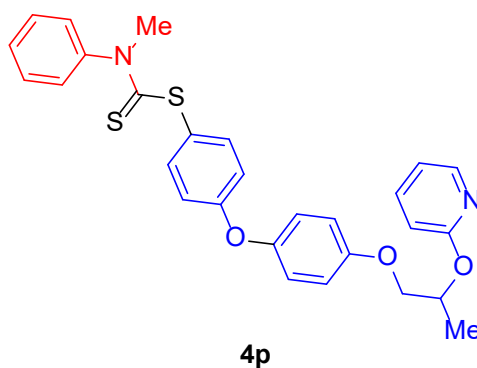

**4-(4-(2-(Pyridin-2-yloxy)propoxy)phenoxy)phenyl methyl(phenyl)**

**carbamodithioate. (4p)** Following the general **procedure A**, **4p** which was purified by PE/EtOAc (20:1) and obtained as a yellow solid (53 mg, 53%). **Mp** = 115-116 °C. **R<sub>f</sub>** = 0.3 (PE/EtOAc = 10:1). **<sup>1</sup>H NMR** (400 MHz, Chloroform-*d*) δ 8.18 (dd, *J* = 5.2, 1.9 Hz, 1H), 7.59 (m, 1H), 7.56 – 7.45 (m, 3H), 7.39 (d, *J* = 7.4 Hz, 2H), 7.32 (d, *J* = 8.7 Hz, 2H), 7.04 (d, *J* = 9.0 Hz, 2H), 6.96 (dd, *J* = 11.3, 8.9 Hz, 4H), 6.91 – 6.86 (m, 1H), 6.77 (d, *J* = 8.3 Hz, 1H), 5.62 (q, *J* = 5.7 Hz, 1H), 4.22 (dd, *J* = 9.9, 5.3 Hz, 1H), 4.11 (dd, *J* = 9.9, 4.8 Hz, 1H), 3.81 (s, 3H), 1.52 (d, *J* = 6.3 Hz, 3H). **<sup>13</sup>C NMR** (101 MHz, Chloroform-*d*) δ 200.26, 163.15, 160.35, 155.78, 149.03, 146.80, 144.94, 138.76, 138.32 (2C), 129.84 (2C), 129.15, 126.96 (2C), 125.13, 121.65 (2C), 117.37 (2C), 116.82, 115.89 (2C), 111.71, 71.02, 69.27, 46.65, 17.05. **HRMS m/z** (ESI) calcd for C<sub>28</sub>H<sub>27</sub>N<sub>2</sub>O<sub>3</sub>S<sub>2</sub> [M + H]<sup>+</sup> 503.1459 ; found 503.1465.

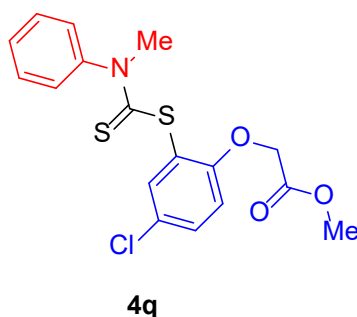

**Methyl 2-(4-chloro-2-((methyl(phenyl)carbamothioyl)thio)phenoxy)acetate. (4q)**

Following the general **procedure A**, **4q** which was purified by PE/EtOAc (10:1) and obtained as a yellow solid (34 mg, 45%). **Mp** = 85-86 °C. **R<sub>f</sub>** = 0.2 (PE/EtOAc = 10:1).

$^1\text{H NMR}$  (400 MHz, Chloroform-*d*)  $\delta$  7.57 – 7.50 (m, 2H), 7.50 – 7.43 (m, 3H), 7.38 (d,  $J = 7.4$  Hz, 2H), 6.82 (dt,  $J = 8.4, 1.0$  Hz, 1H), 4.66 (s, 2H), 3.83 (s, 3H), 3.80 (s, 3H).  $^{13}\text{C NMR}$  (101 MHz, Chloroform-*d*)  $\delta$  197.48, 168.74, 157.47, 145.06, 137.58, 131.73, 129.88 (2C), 129.19, 126.93 (2C), 126.79, 123.98, 114.59, 66.73, 52.28, 46.56. **HRMS m/z** (ESI) calcd for  $\text{C}_{17}\text{H}_{17}\text{ClNO}_3\text{S}_2$   $[\text{M} + \text{H}]^+$  382.0333 ; found 382.0333.

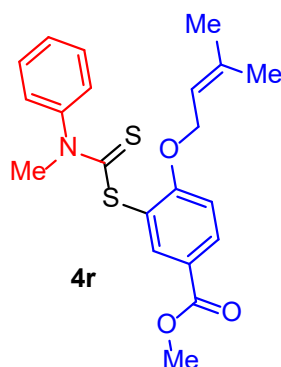

**methyl 3-((methyl(phenyl)carbamothioyl)thio)-4-((3-methylbut-2-en-1-yl) oxy) benzoate. (4r)**  $R_f = 0.2$  (PE/EtOAc = 50:1).  $^1\text{H NMR}$  (400 MHz, DMSO-*d*<sub>6</sub>)  $\delta$  8.04 (dd,  $J = 8.7, 2.3$  Hz, 1H), 7.83 (d,  $J = 2.2$  Hz, 1H), 7.62 – 7.53 (m, 2H), 7.53 – 7.47 (m, 3H), 7.21 (d,  $J = 8.8$  Hz, 1H), 5.44 – 5.39 (m, 1H), 4.64 (d,  $J = 6.6$  Hz, 2H), 3.83 (s, 3H), 3.70 (s, 3H), 1.78 (s, 4H), 1.73 (s, 4H).  $^{13}\text{C NMR}$  (101 MHz, DMSO-*d*<sub>6</sub>)  $\delta$  196.79, 165.80, 163.23, 145.28, 139.76, 138.69, 133.95, 130.32 (2C), 129.62, 127.33 (2C), 122.38, 121.71, 119.56, 113.72, 66.17, 52.52, 46.78, 25.99, 18.71. **HRMS m/z** (ESI) calcd for  $\text{C}_{21}\text{H}_{24}\text{NO}_3\text{S}_2$   $[\text{M} + \text{H}]^+$  402.1198 ; found 402.1186.

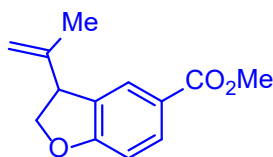

**methyl 3-(prop-1-en-2-yl)-2,3-dihydrobenzofuran-5-carboxylate. (6)**

$R_f = 0.6$  (PE/EtOAc = 50:1).  $^1\text{H NMR}$  (400 MHz, Chloroform-*d*)  $\delta$  7.91 (dd,  $J = 8.4, 1.5$  Hz, 1H), 7.80 (t,  $J = 1.5$  Hz, 1H), 6.81 (d,  $J = 8.4$  Hz, 1H), 4.92 (d,  $J = 0.9$  Hz, 1H), 4.90 – 4.88 (m, 1H), 4.74 (t,  $J = 9.5$  Hz, 1H), 4.44 (dd,  $J = 9.2, 6.7$  Hz, 1H), 4.19 (dd,  $J = 9.8, 6.7$  Hz, 1H), 3.87 (s, 2H), 1.64 (s, 3H).  $^{13}\text{C NMR}$  (101 MHz, Chloroform-*d*)  $\delta$  166.98, 164.34, 143.82, 131.55, 129.34, 126.95, 122.85, 113.64, 109.32, 76.32, 51.91,

49.60, 18.71. **HRMS m/z** (EI) calcd for C<sub>13</sub>H<sub>14</sub>O<sub>3</sub> [M]<sup>+</sup> 218.0943 ; found 218.0939.

The spectra data are matched with those reported <sup>[4]</sup>

## VI. Reference

1. Z. Y. Tian, Z. H. Lin and C. P. Zhang, *Org. Lett.*, 2021, **23**, 4400-4405.
2. X. Li, W. Cui, Q. Deng, X. Song, J. Lv and D. Yang, *Green Chem.*, 2022, **24**, 1302-1307.
3. S. K. Parida, S. Jaiswal, P. Singh and S. Murarka, *Org. Lett.*, 2021, **23**, 6401-6406.
4. J. Li, J. Chen, R. Sang, W. S. Ham, M. B. Plutschack, F. Berger, S. Chhabra, A. Schnegg, C. Genicot and T. Ritter, *Nat. Chem.*, 2020, **12**, 56-62.

## VII. NMR spectra

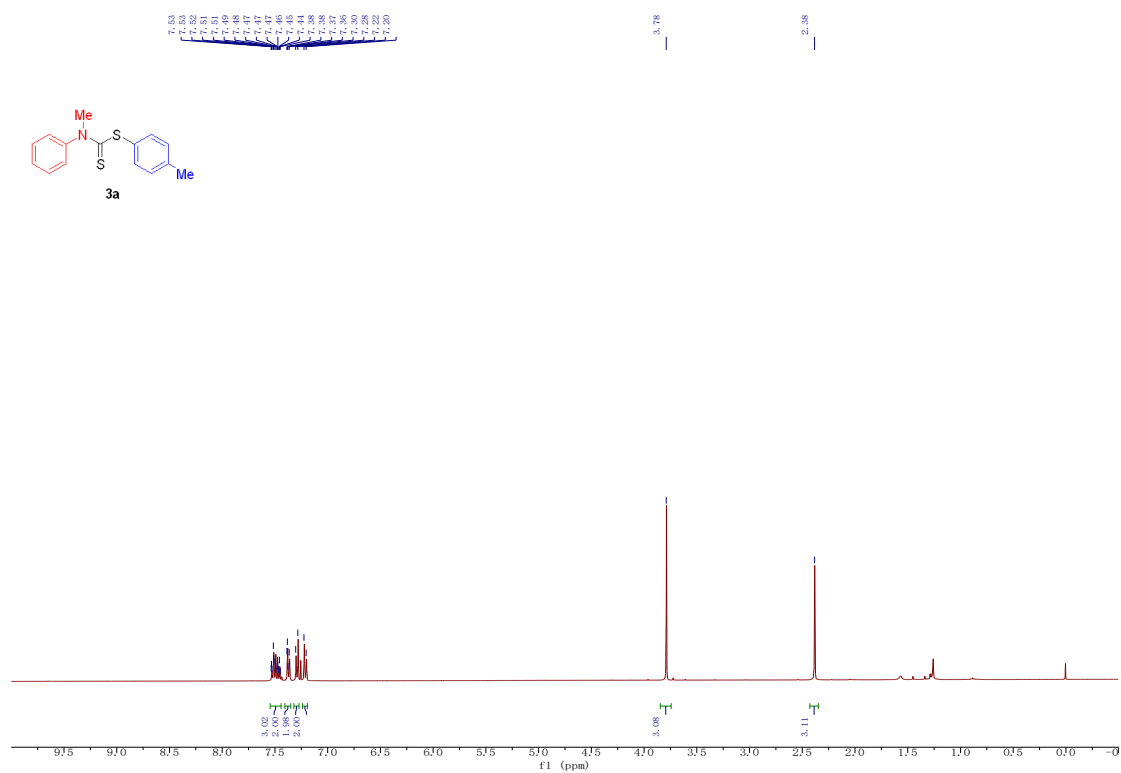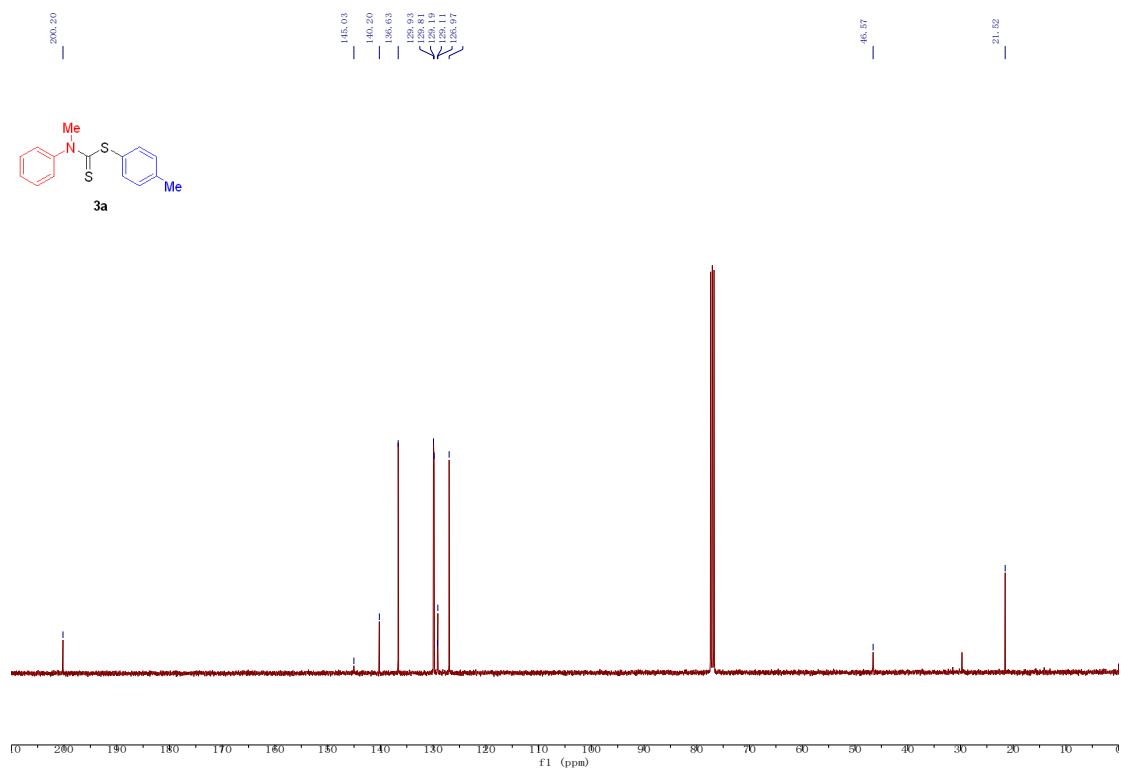



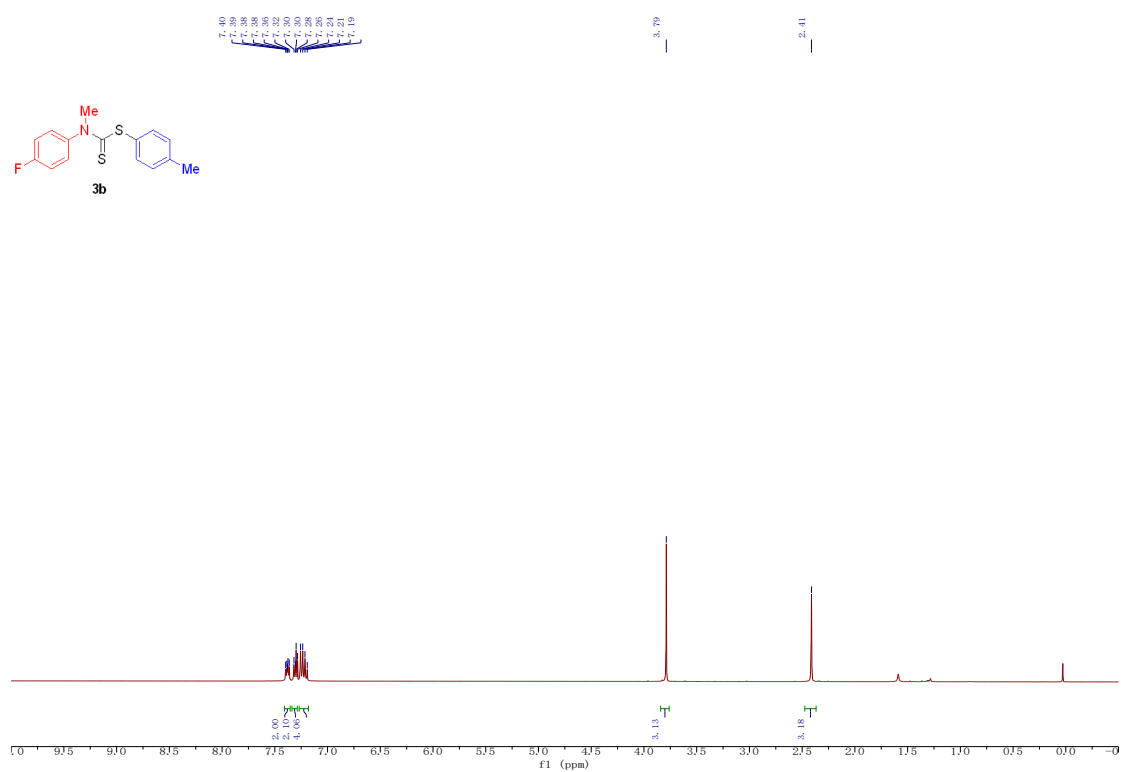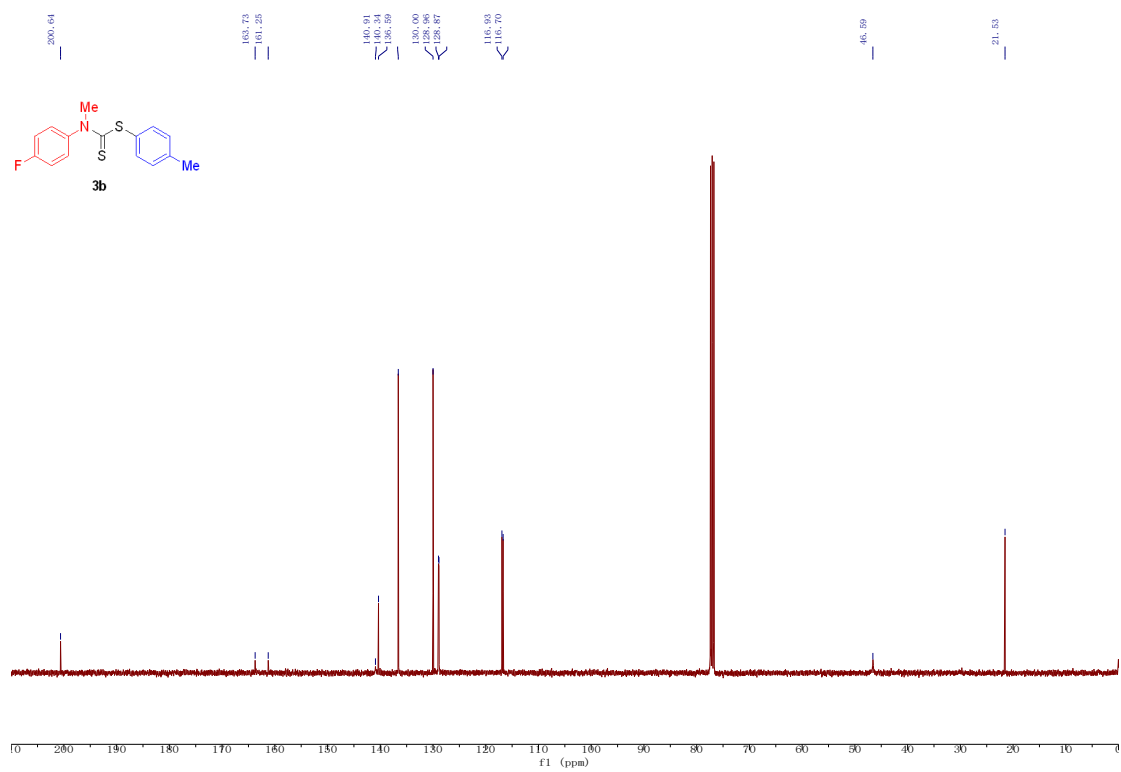

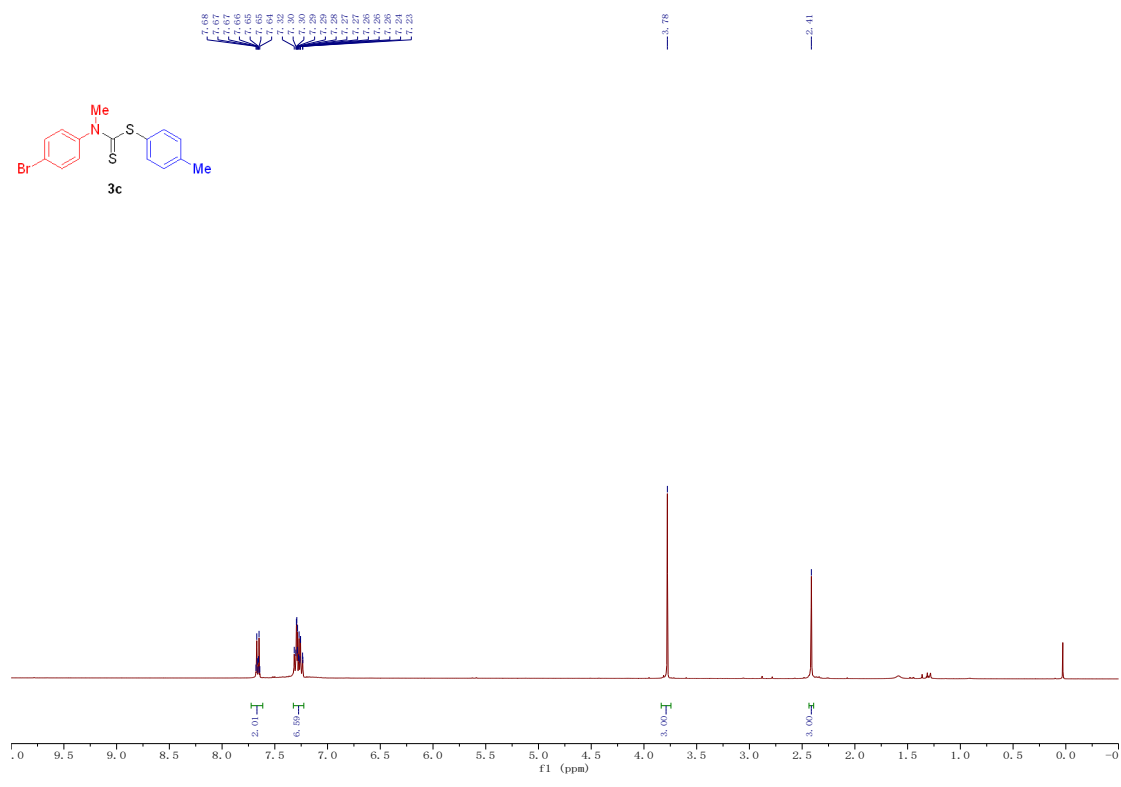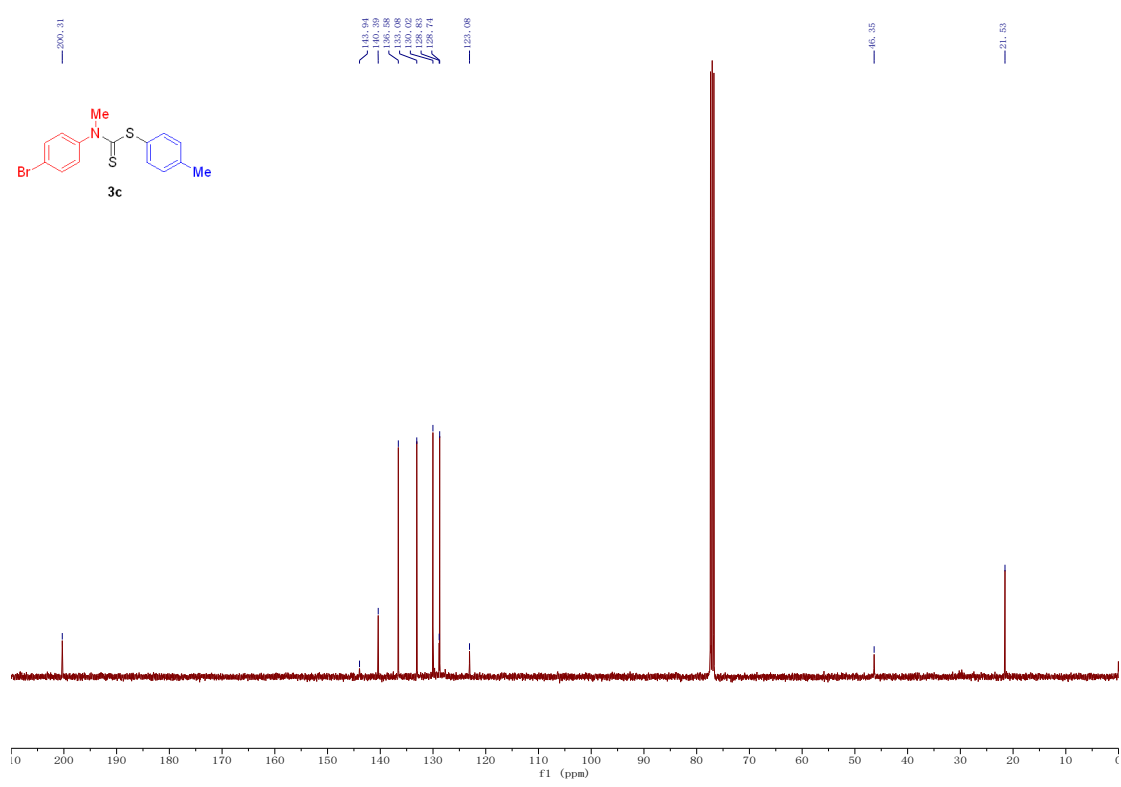

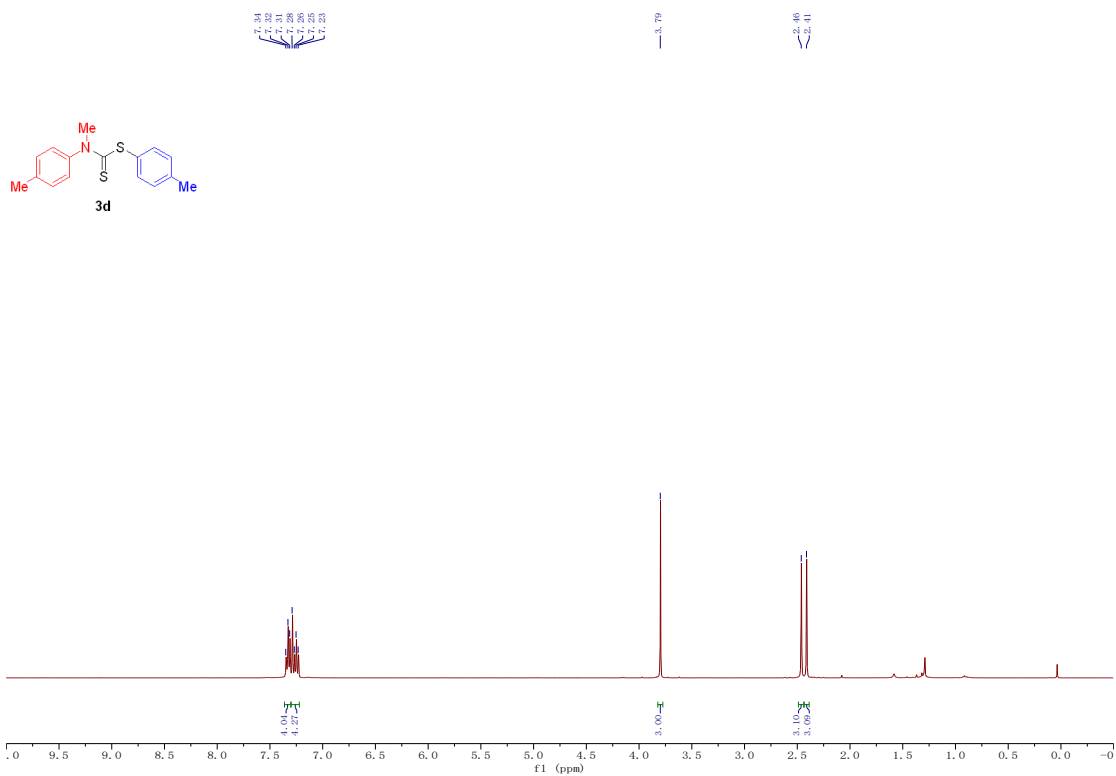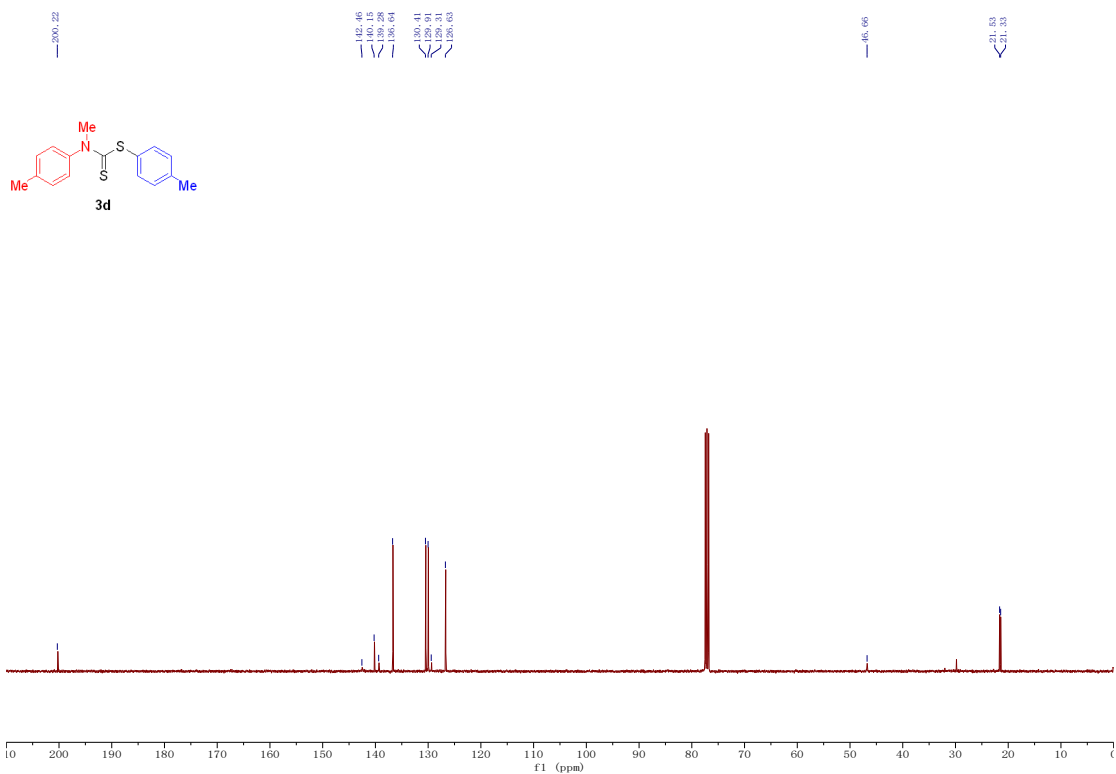

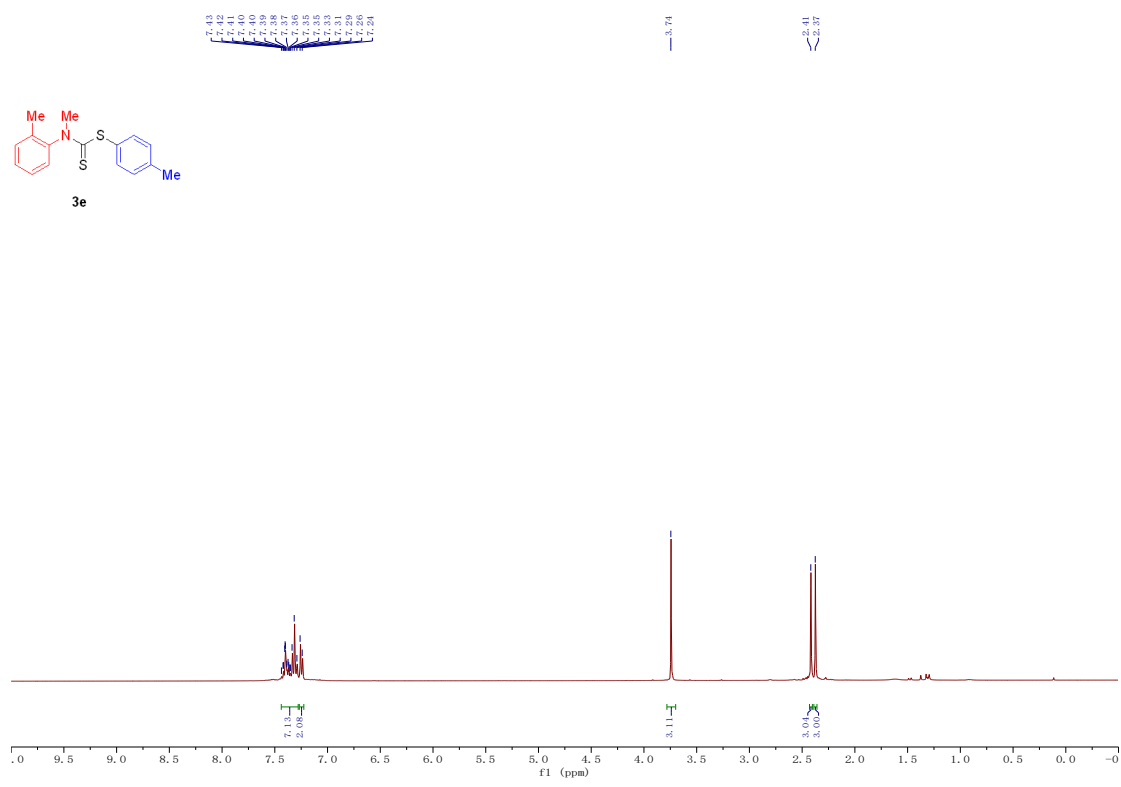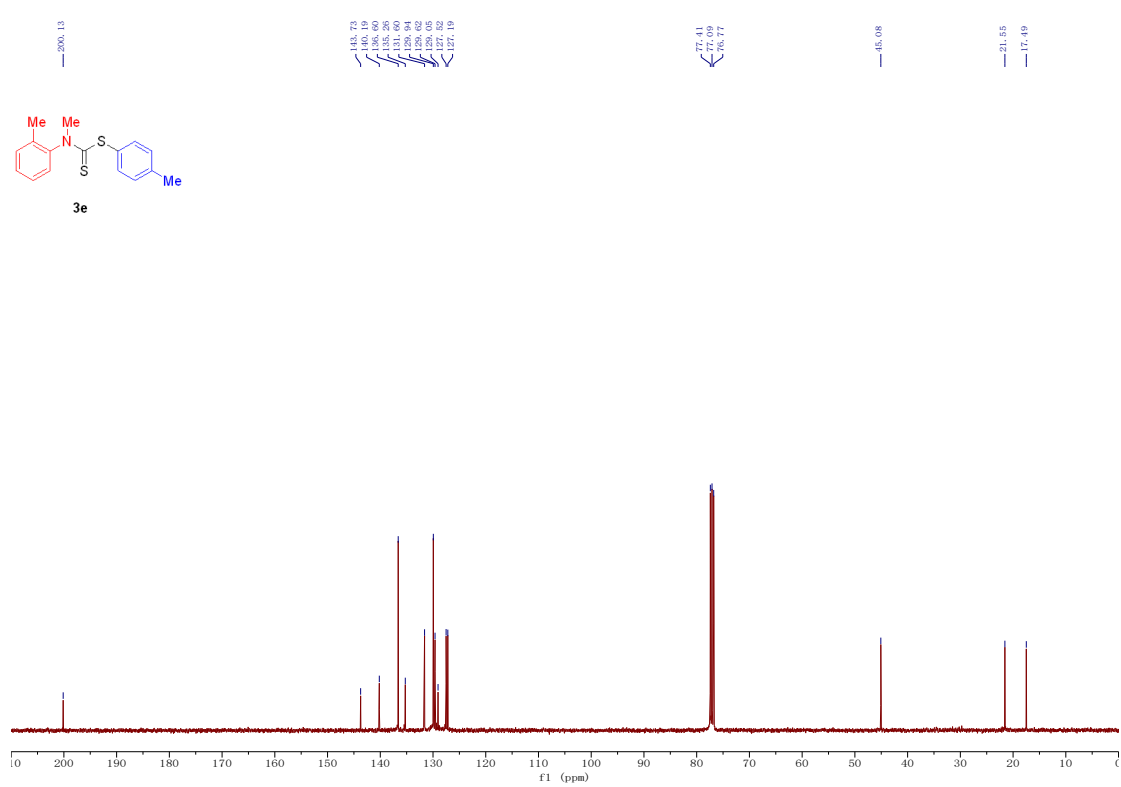

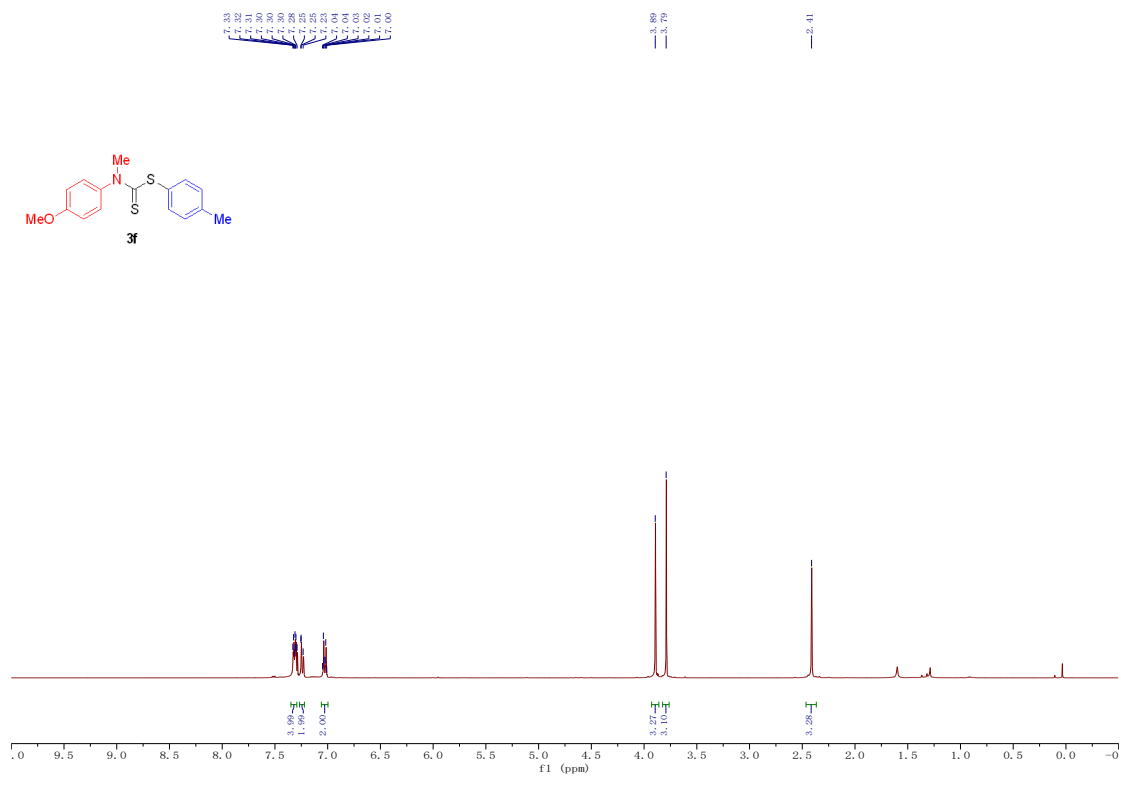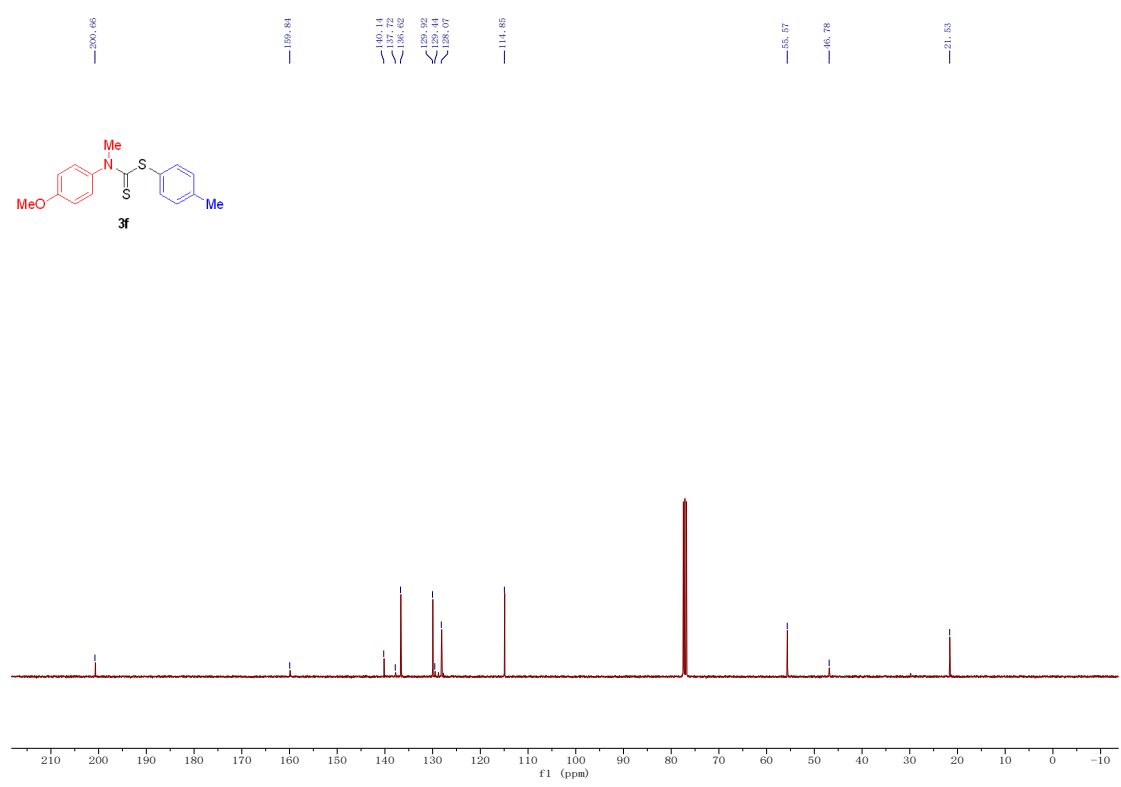

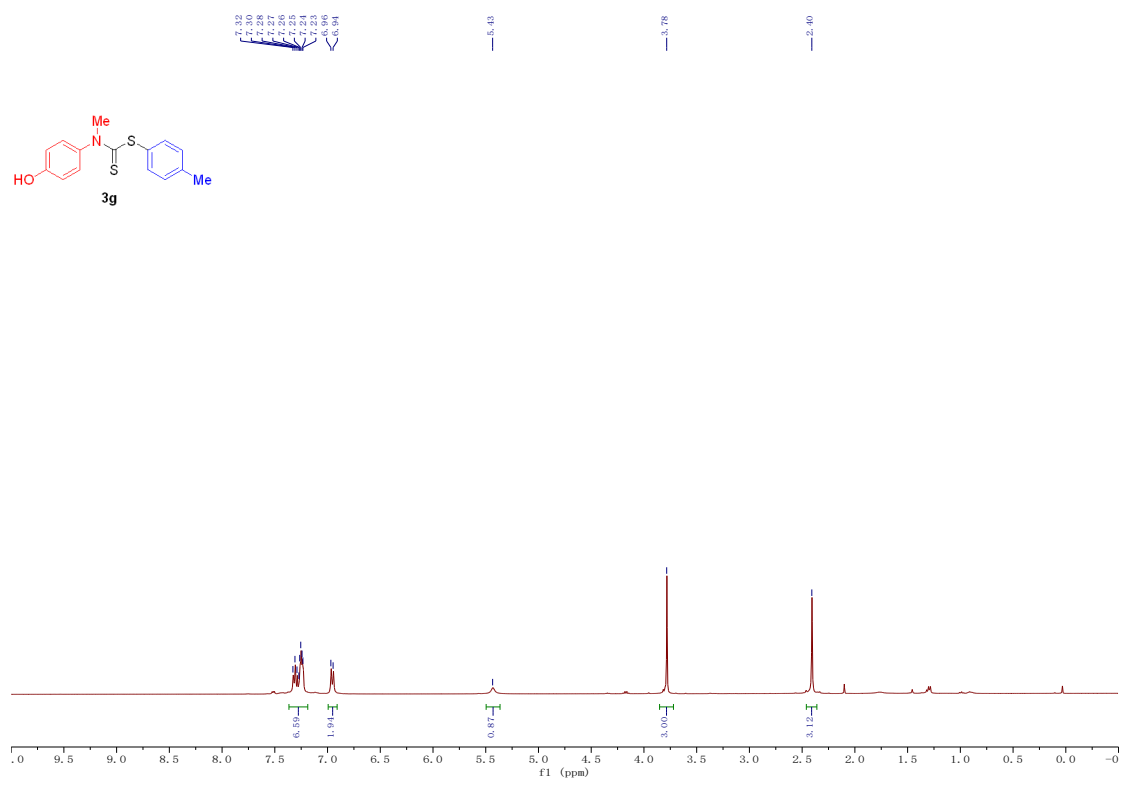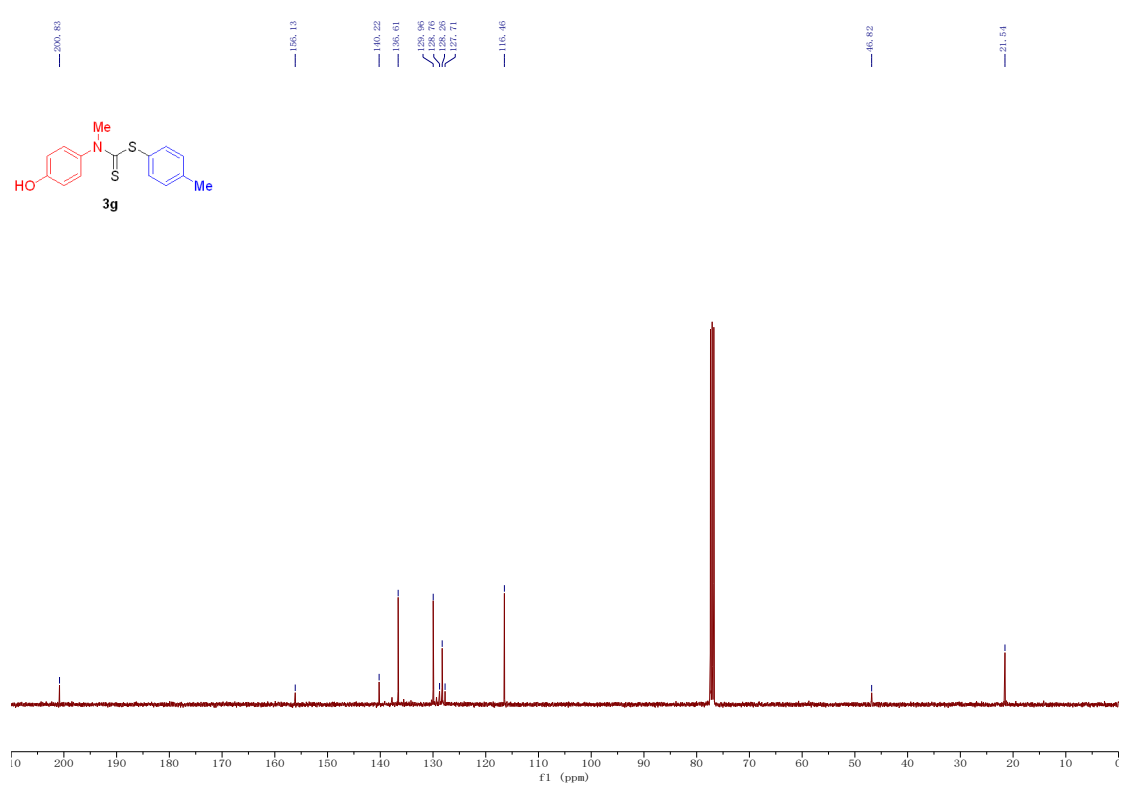

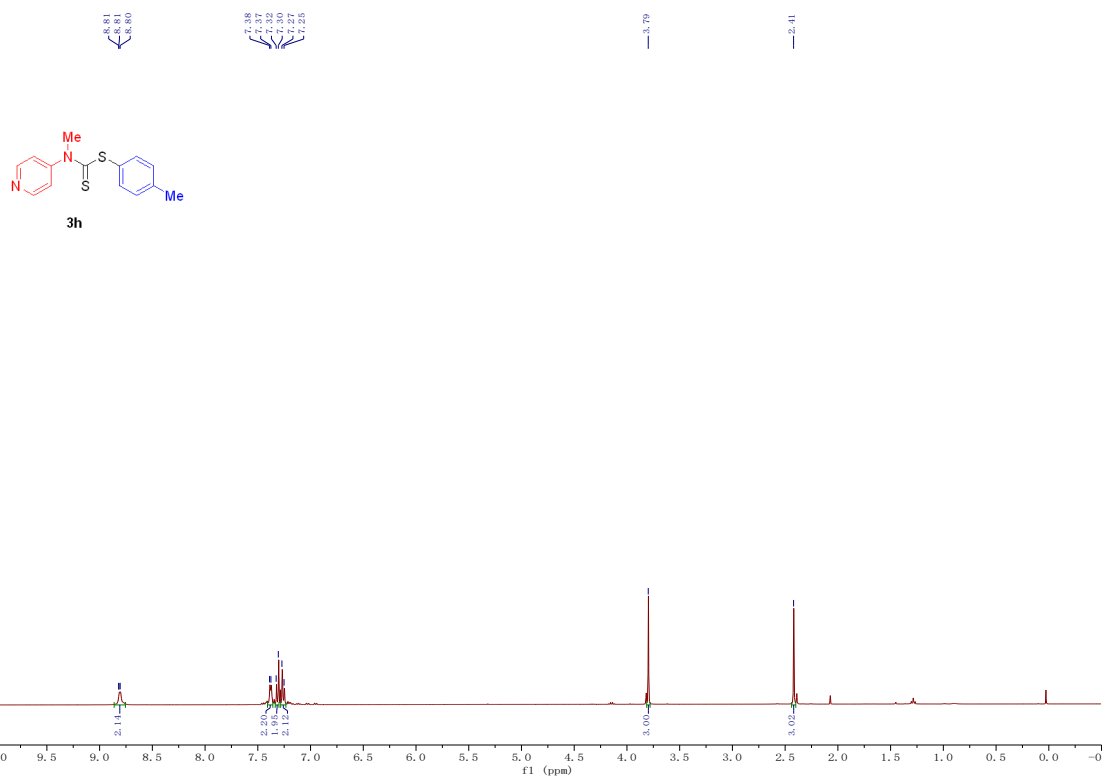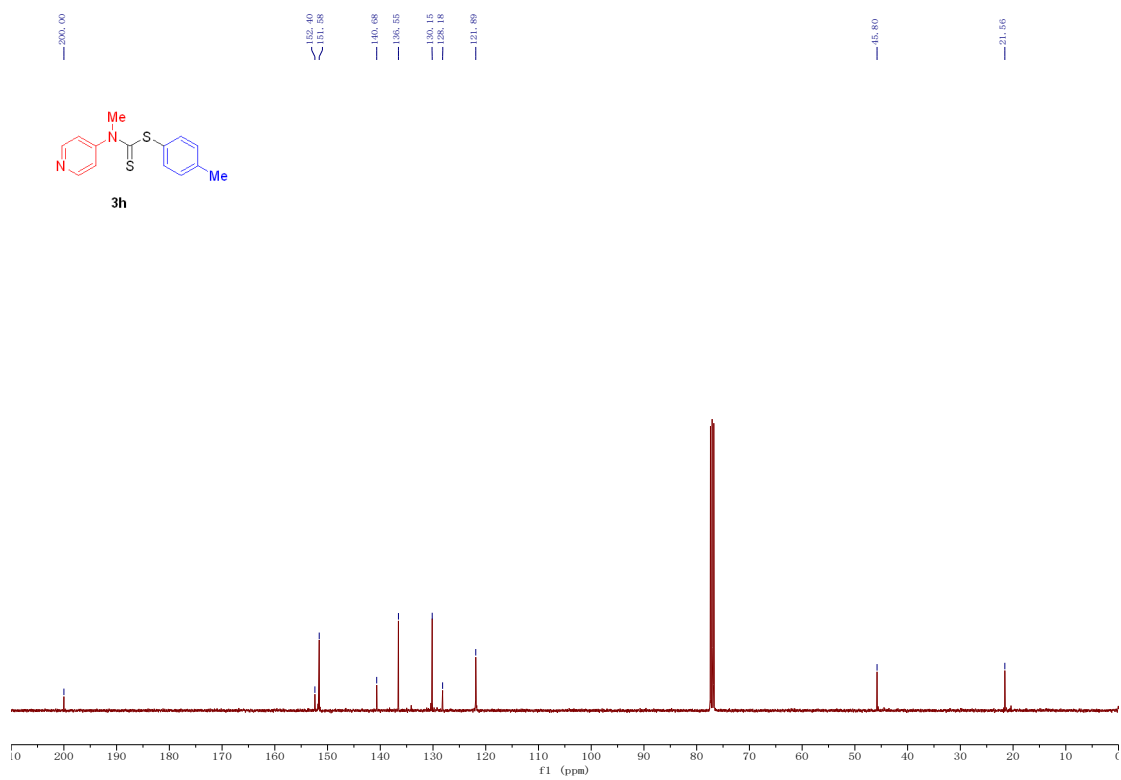

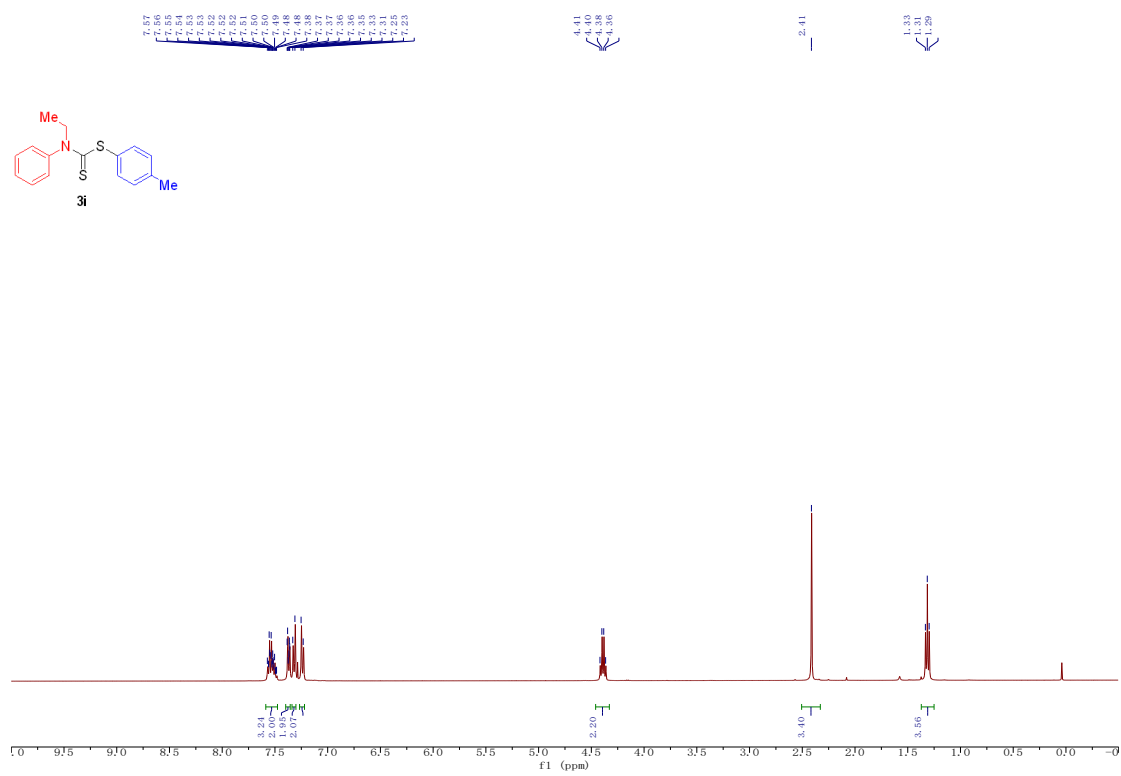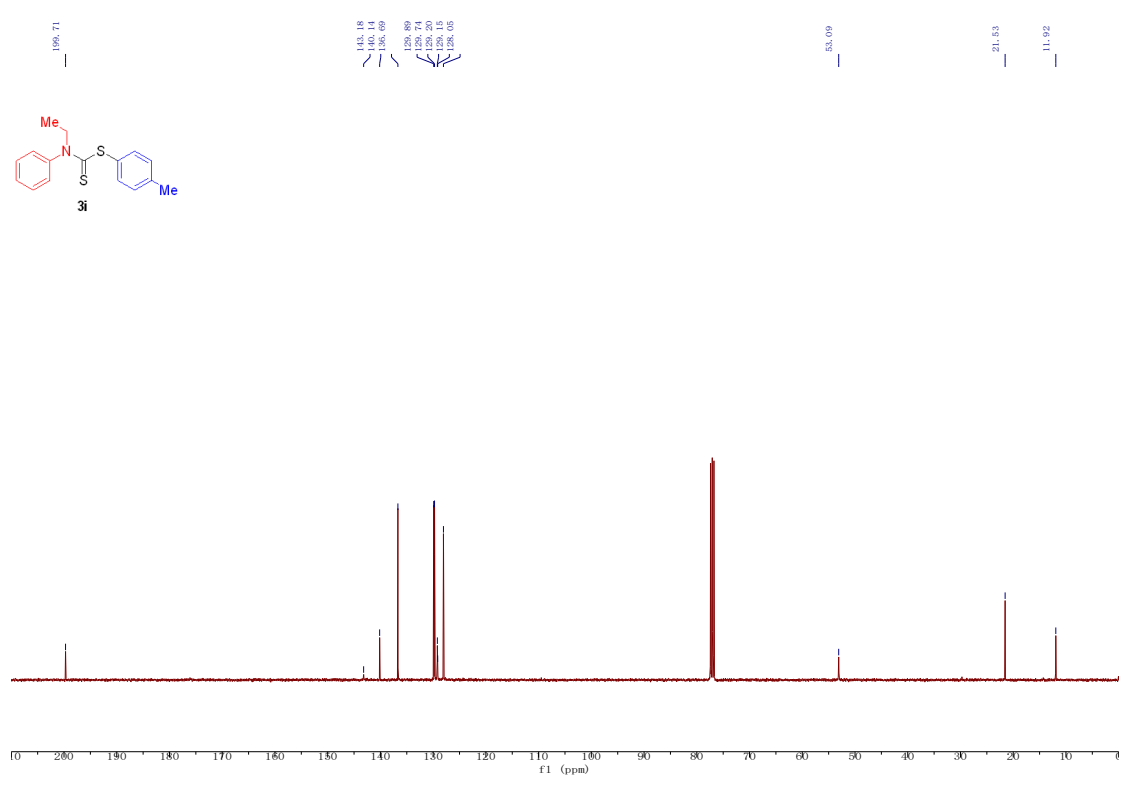



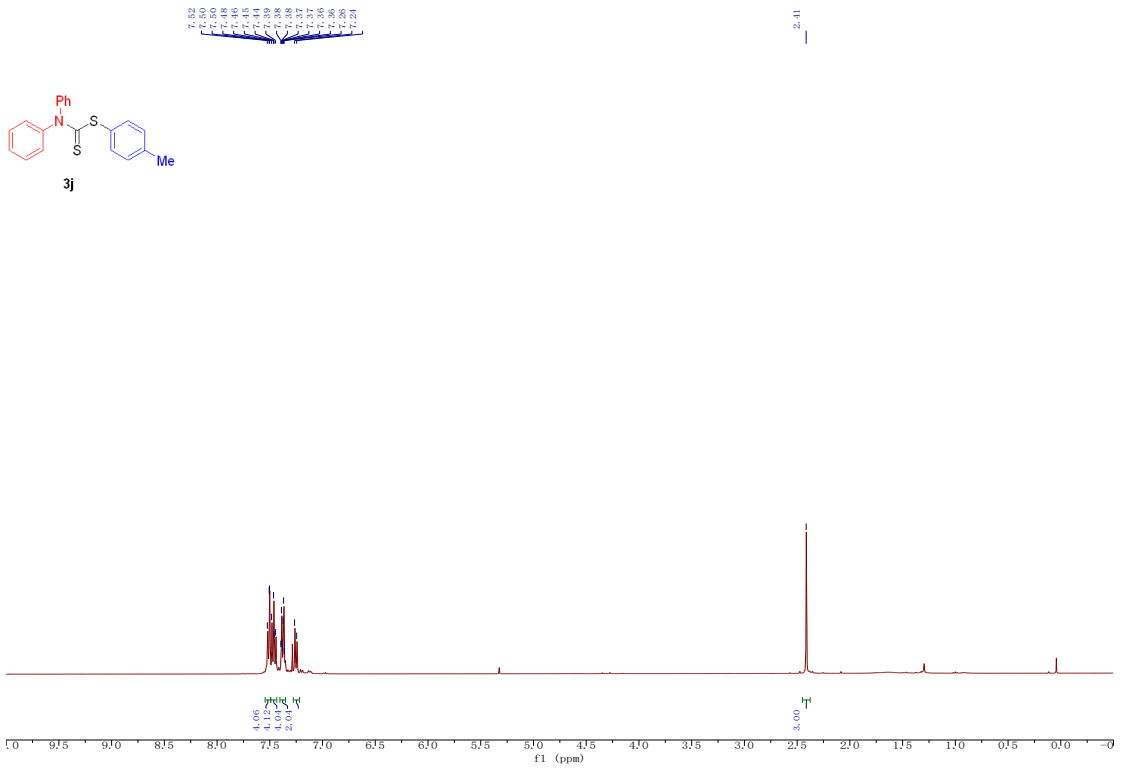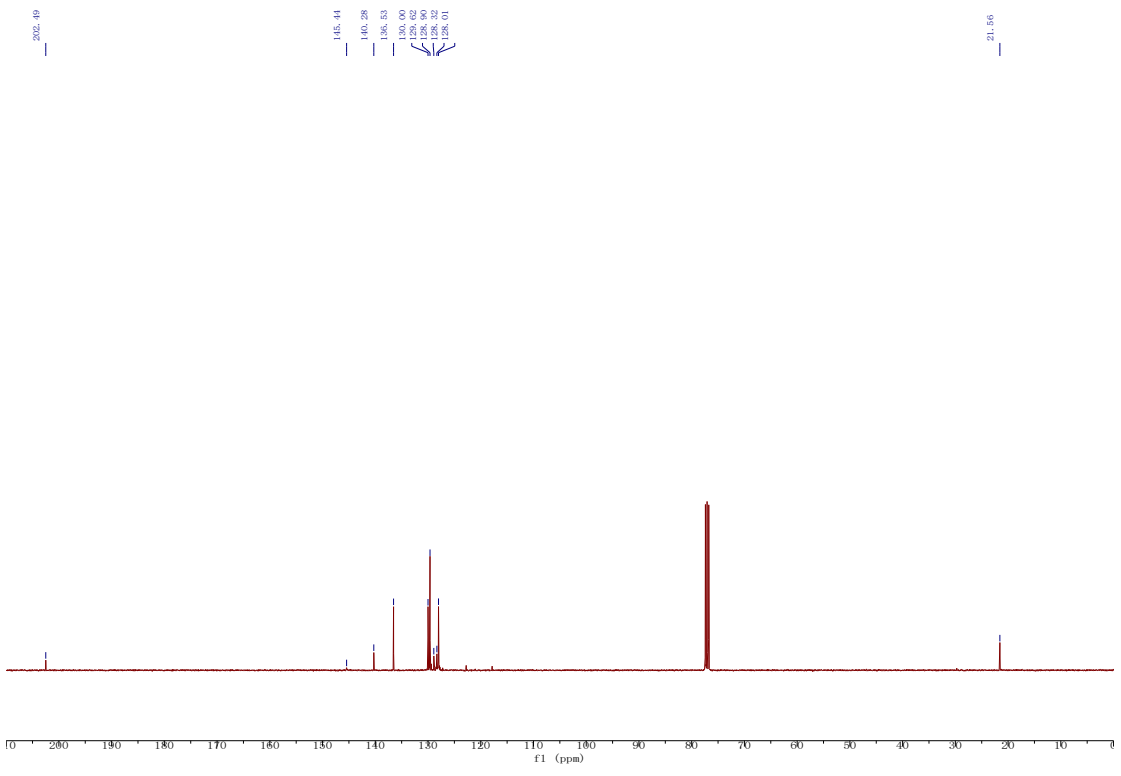

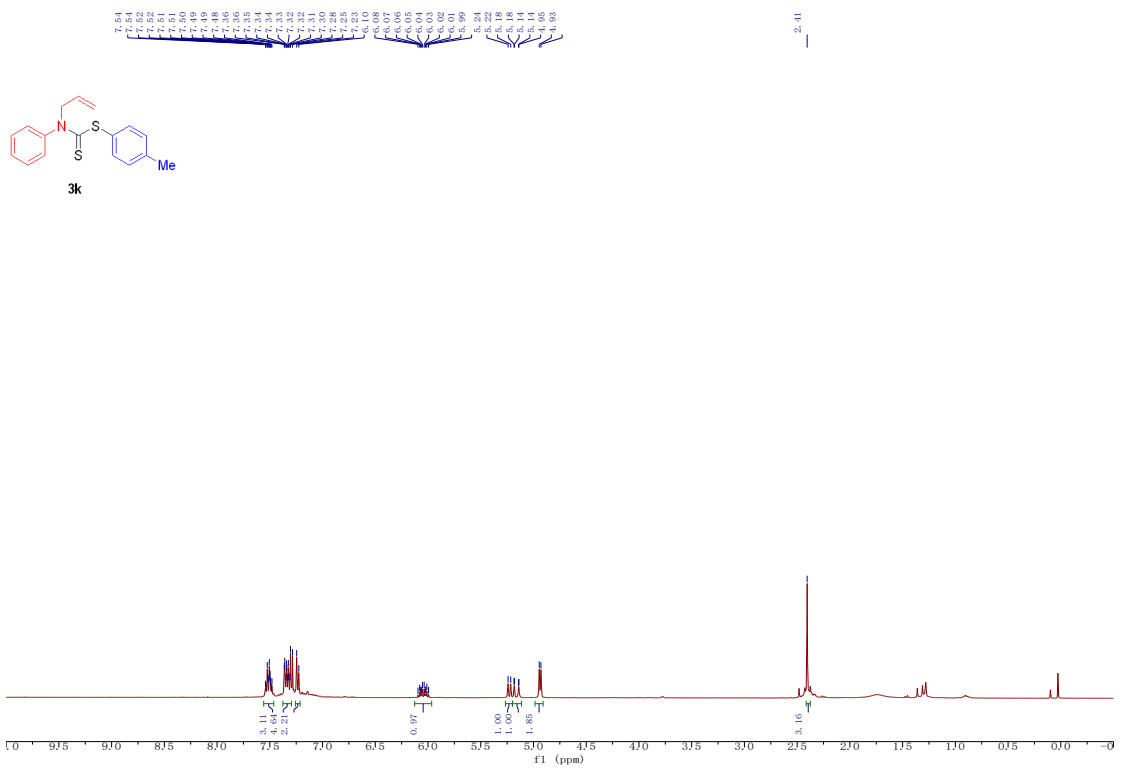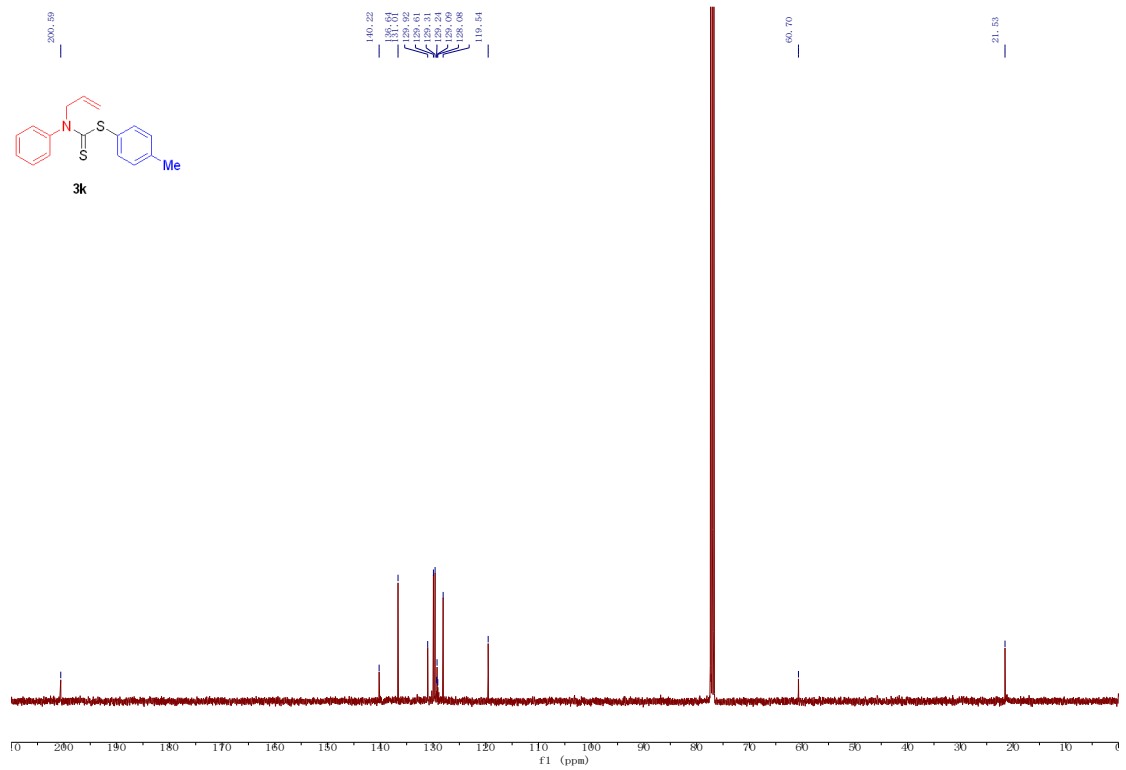

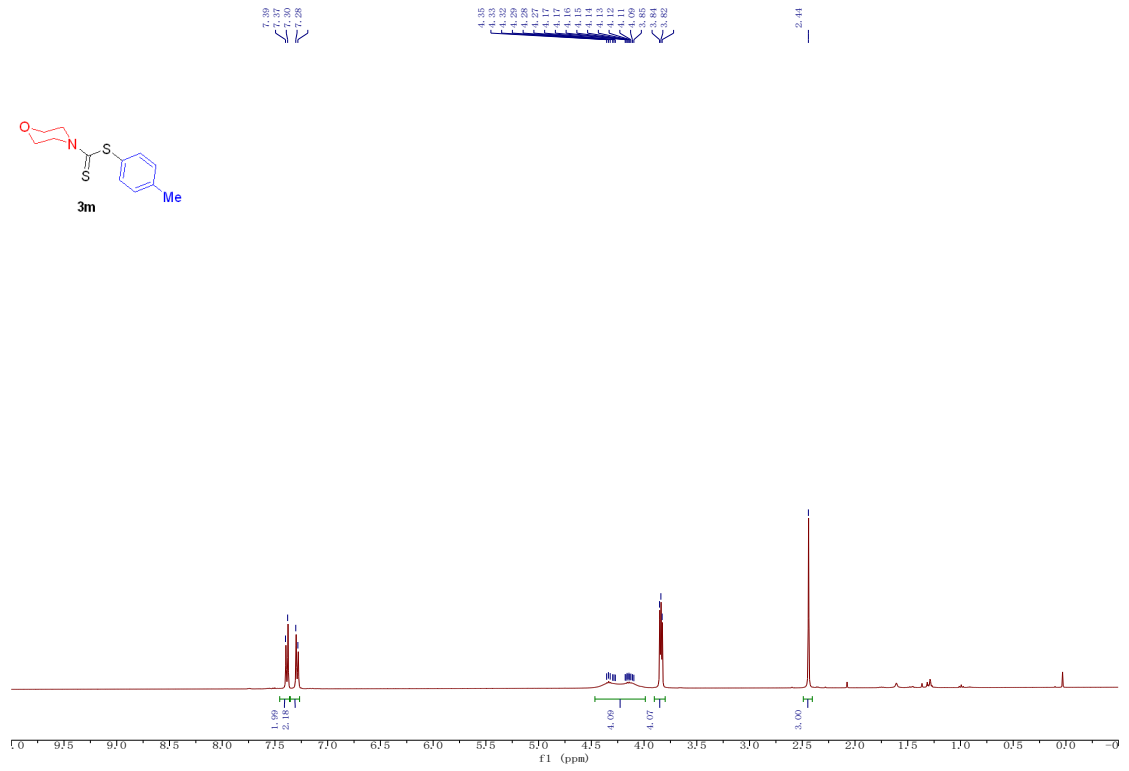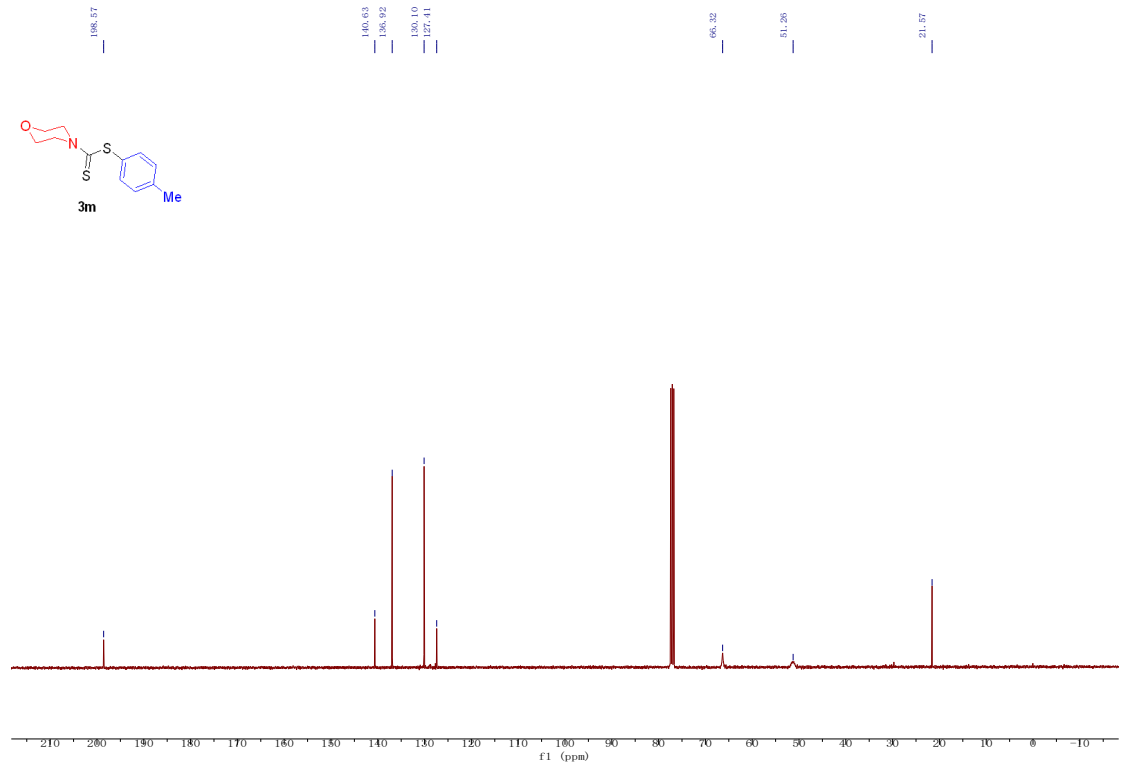

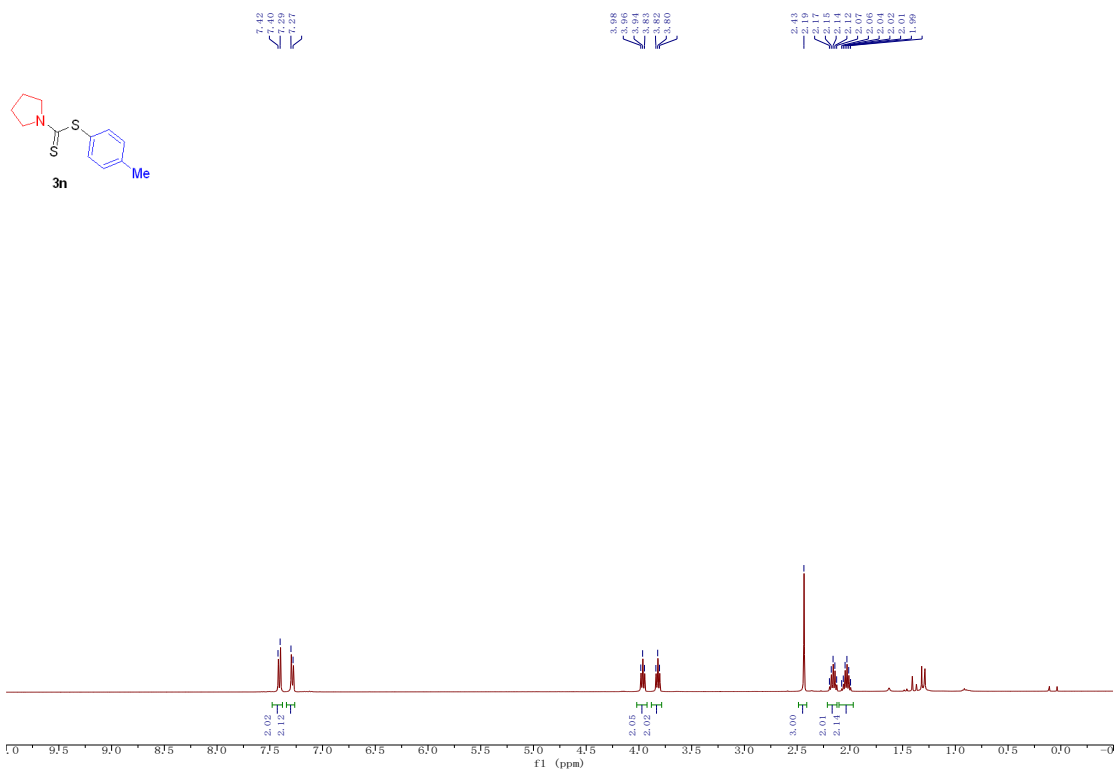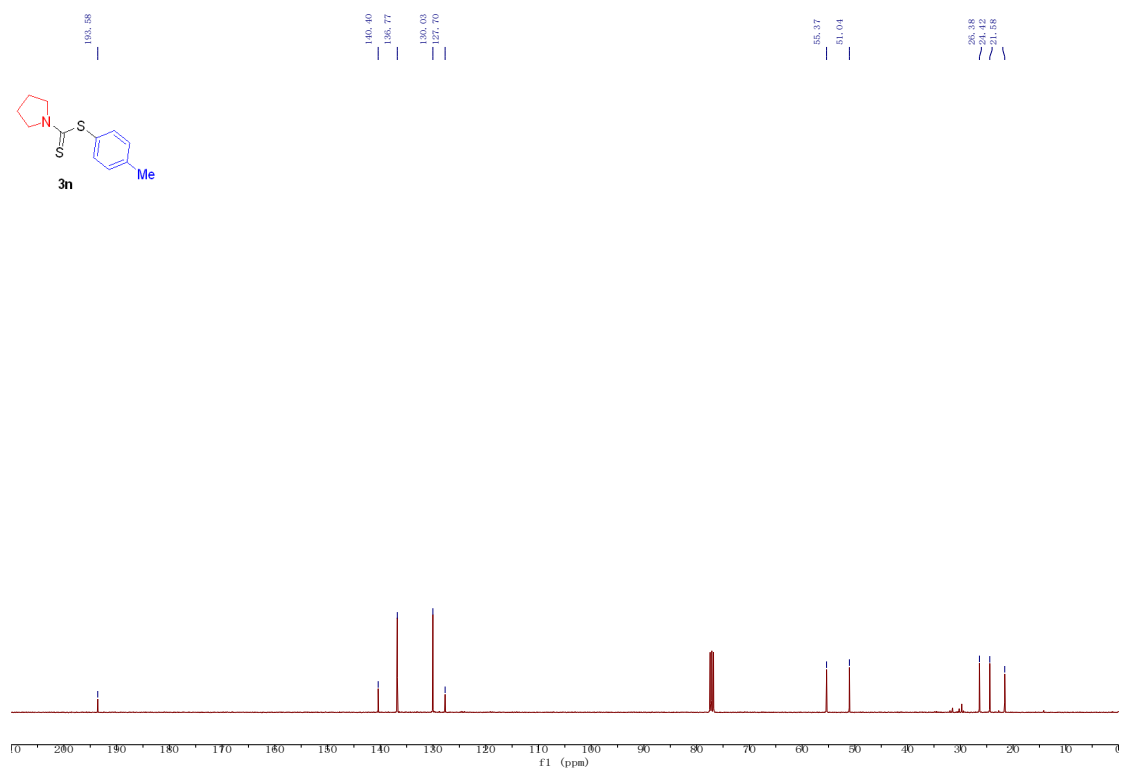

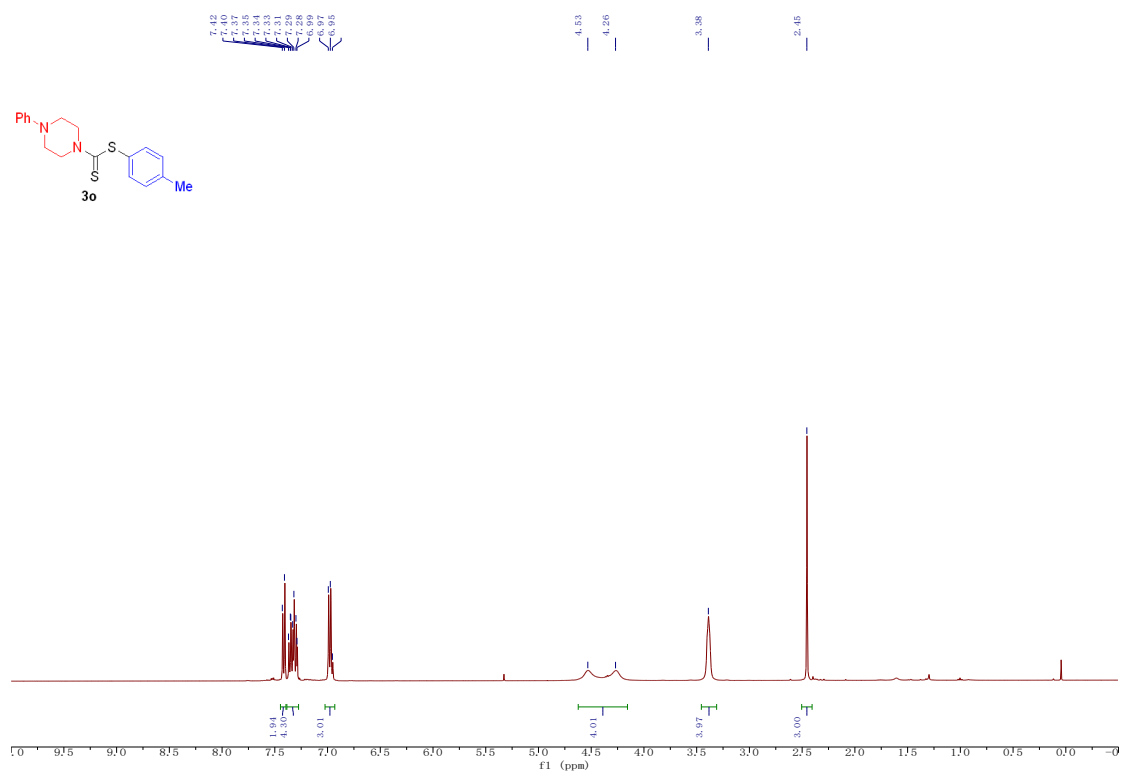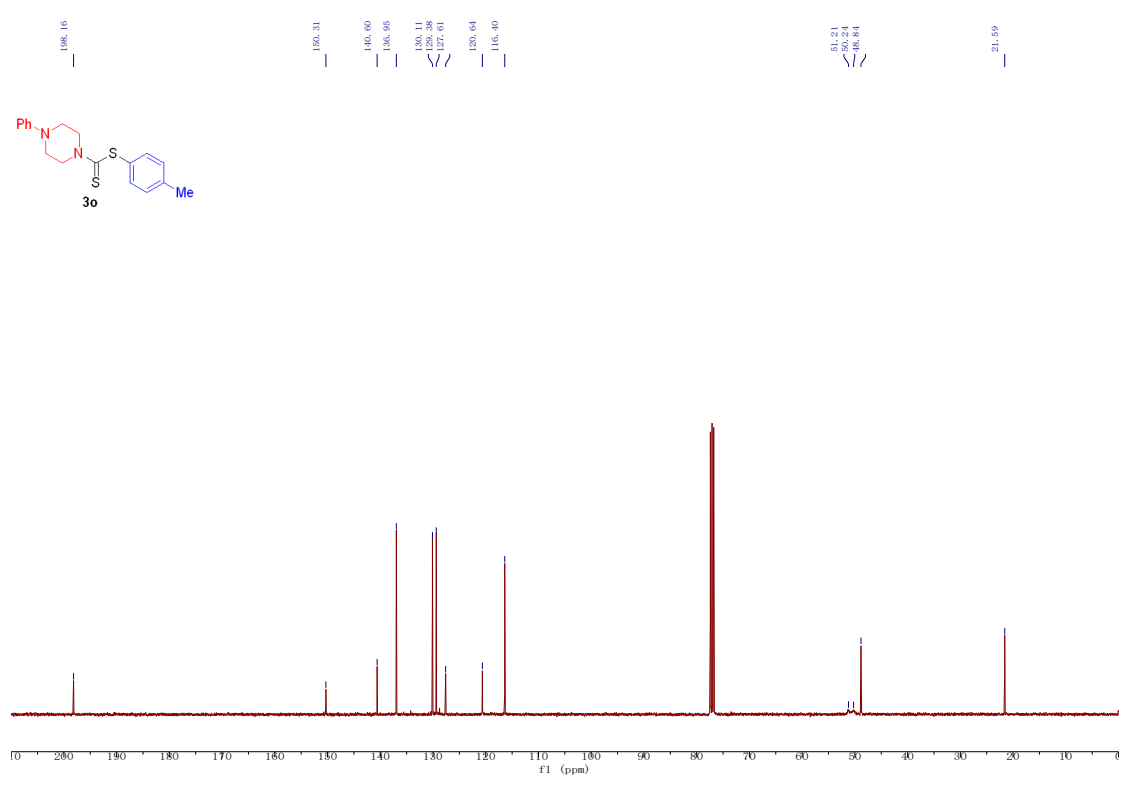

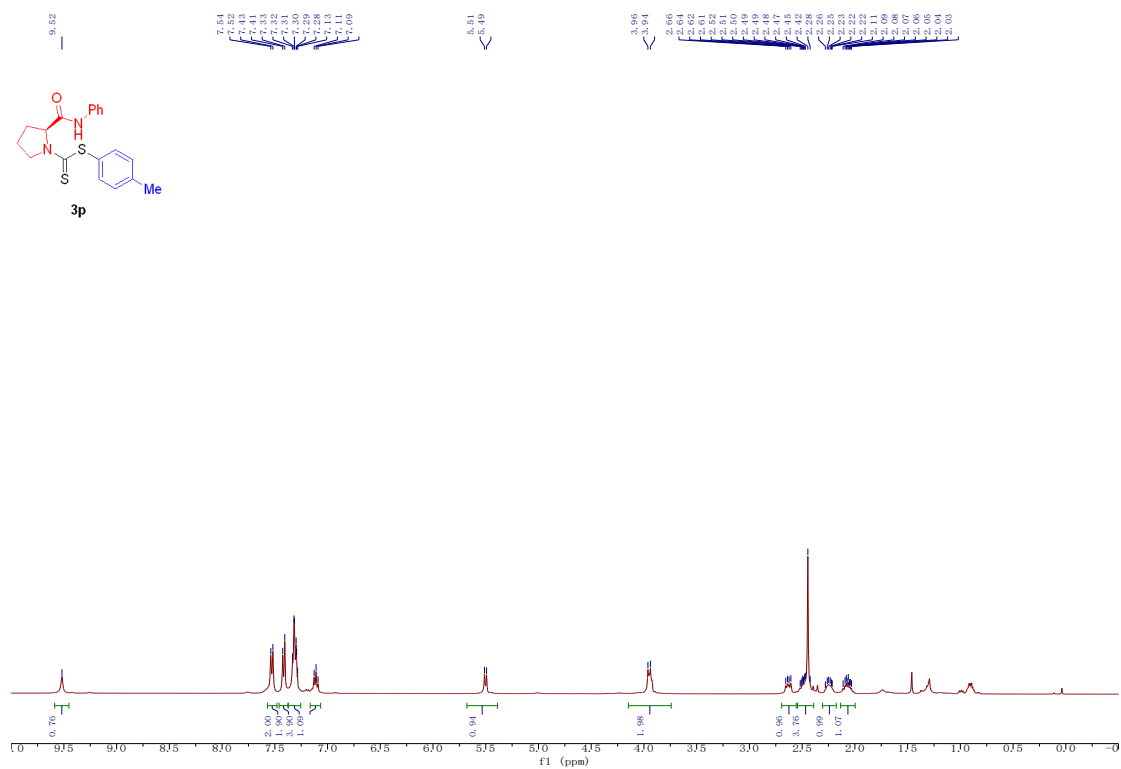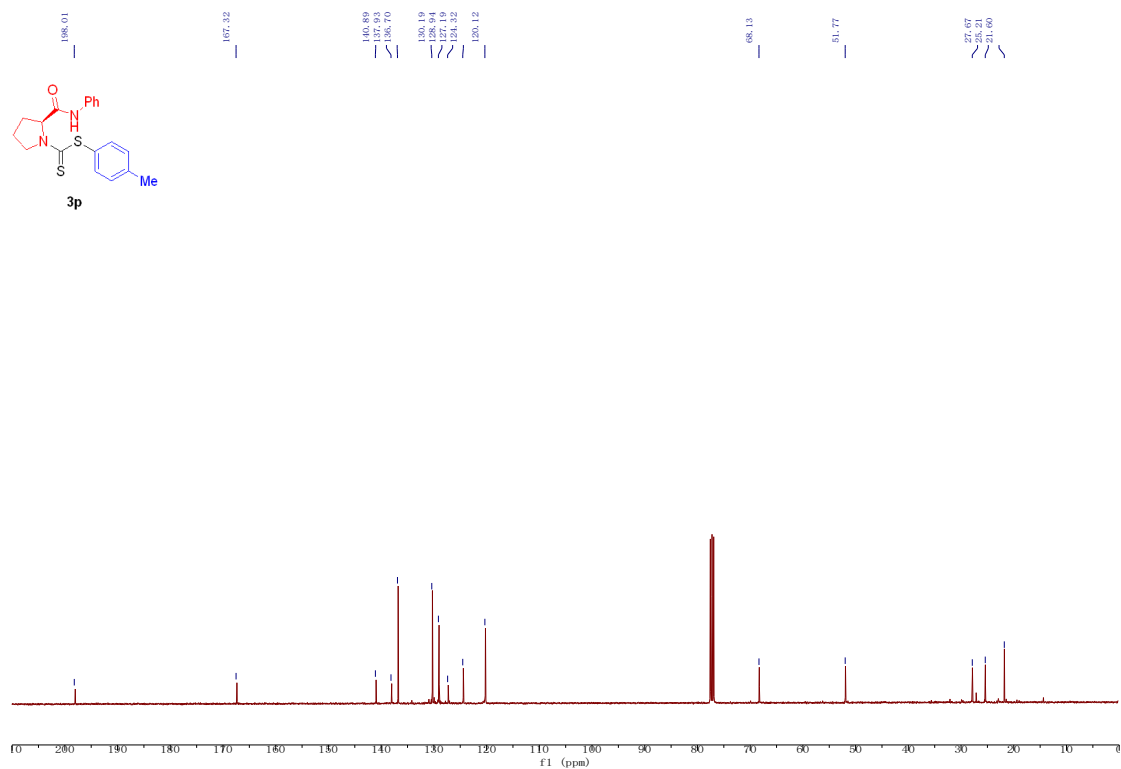

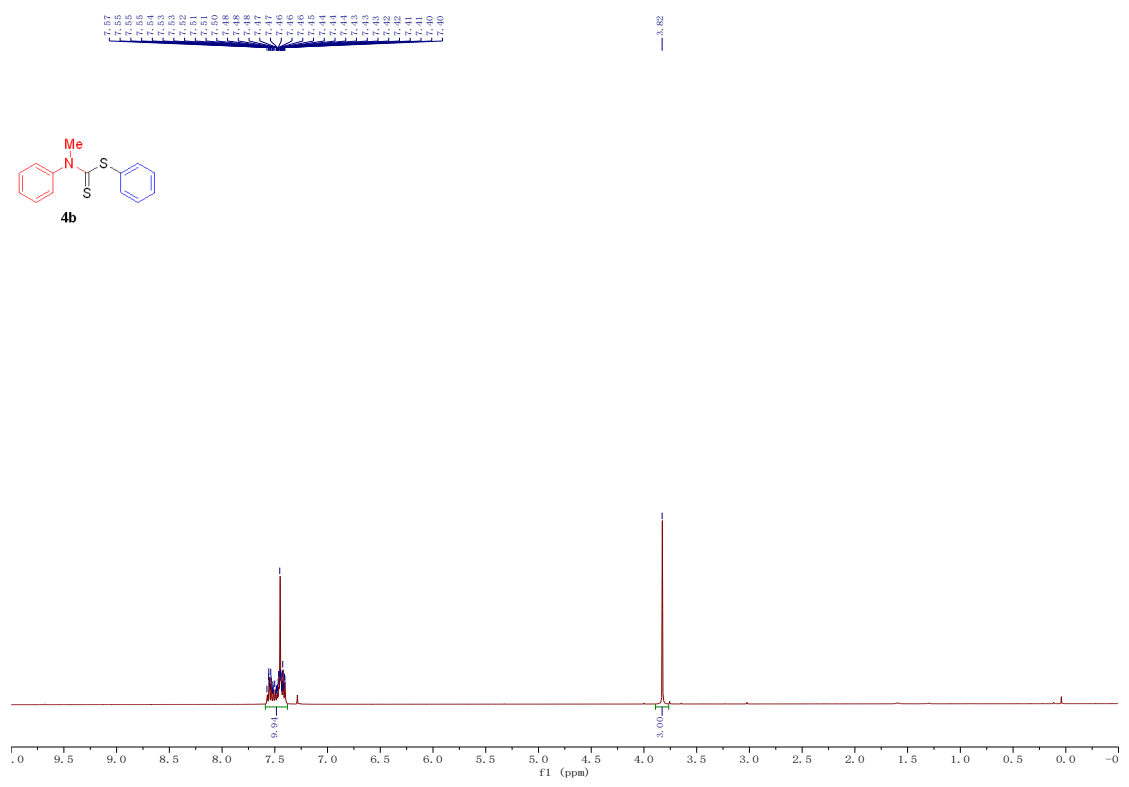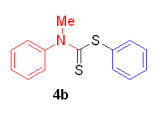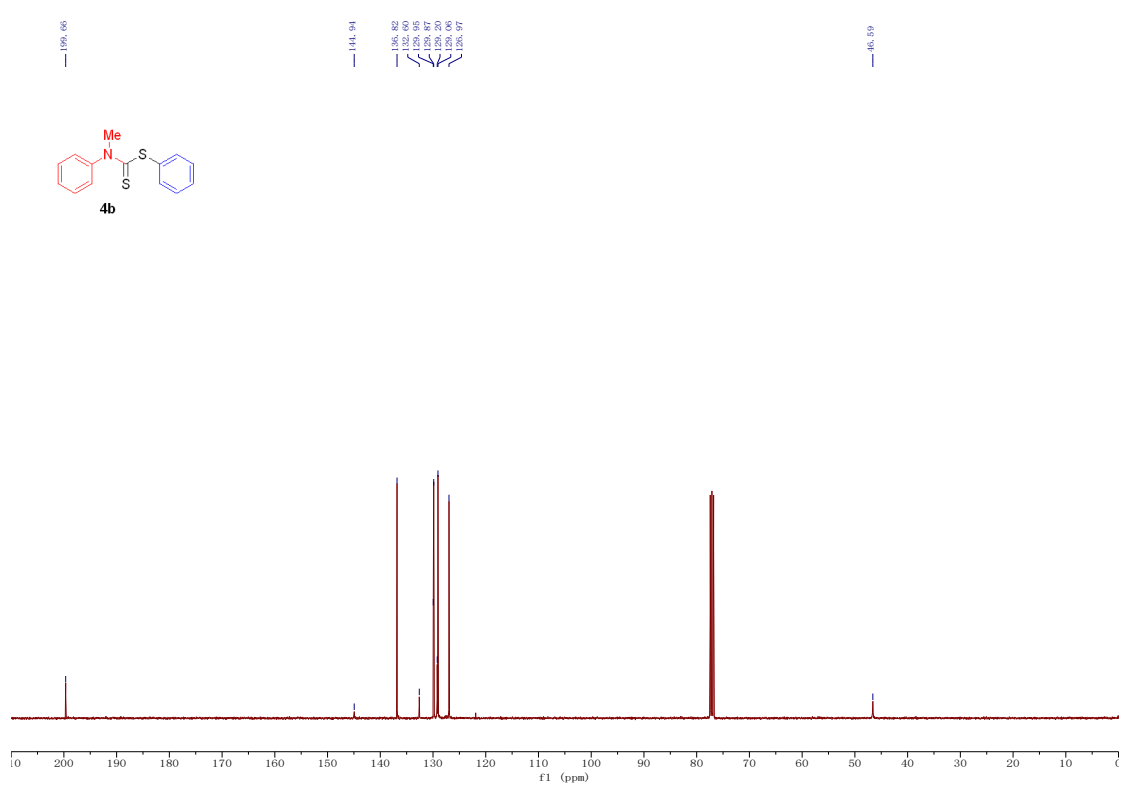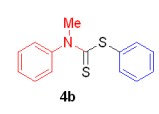

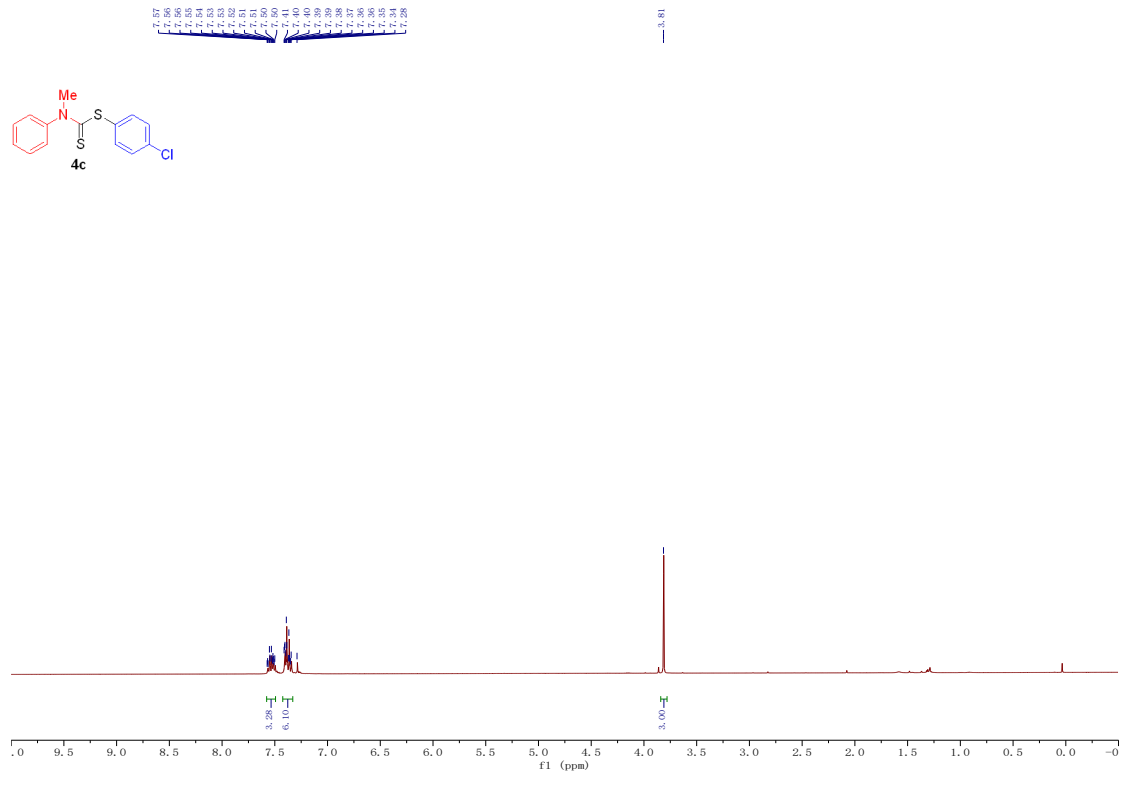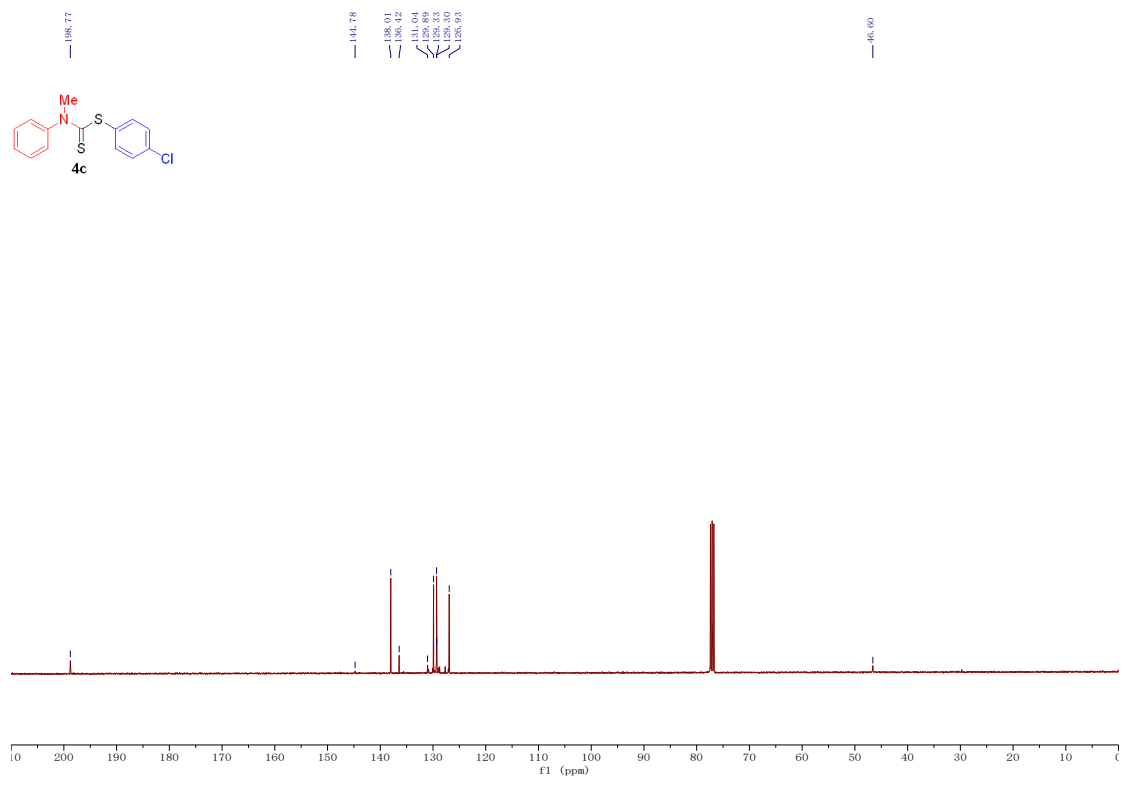



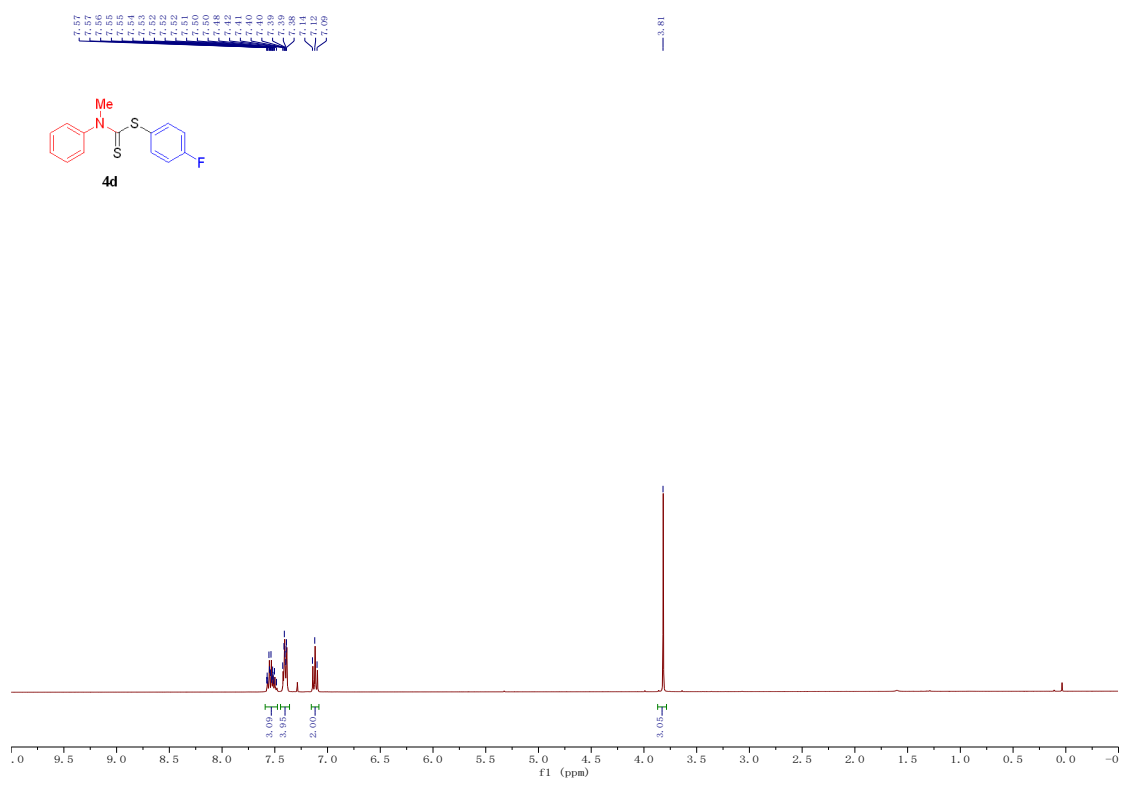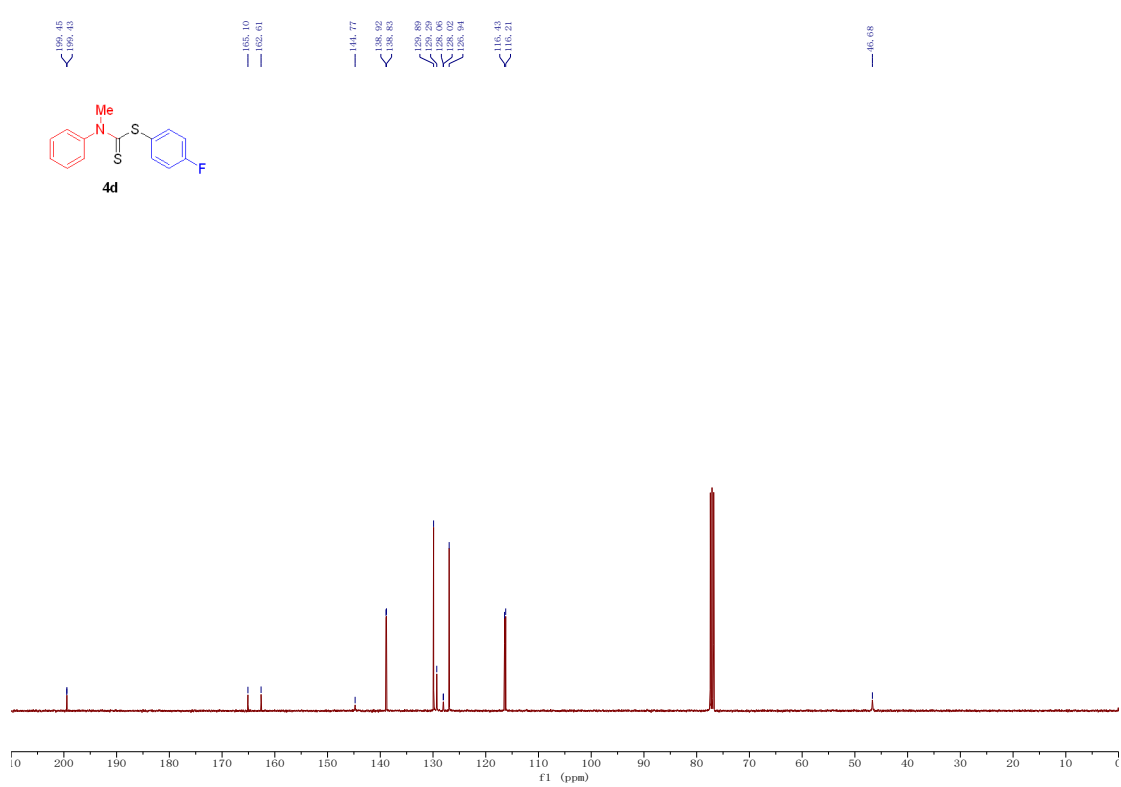

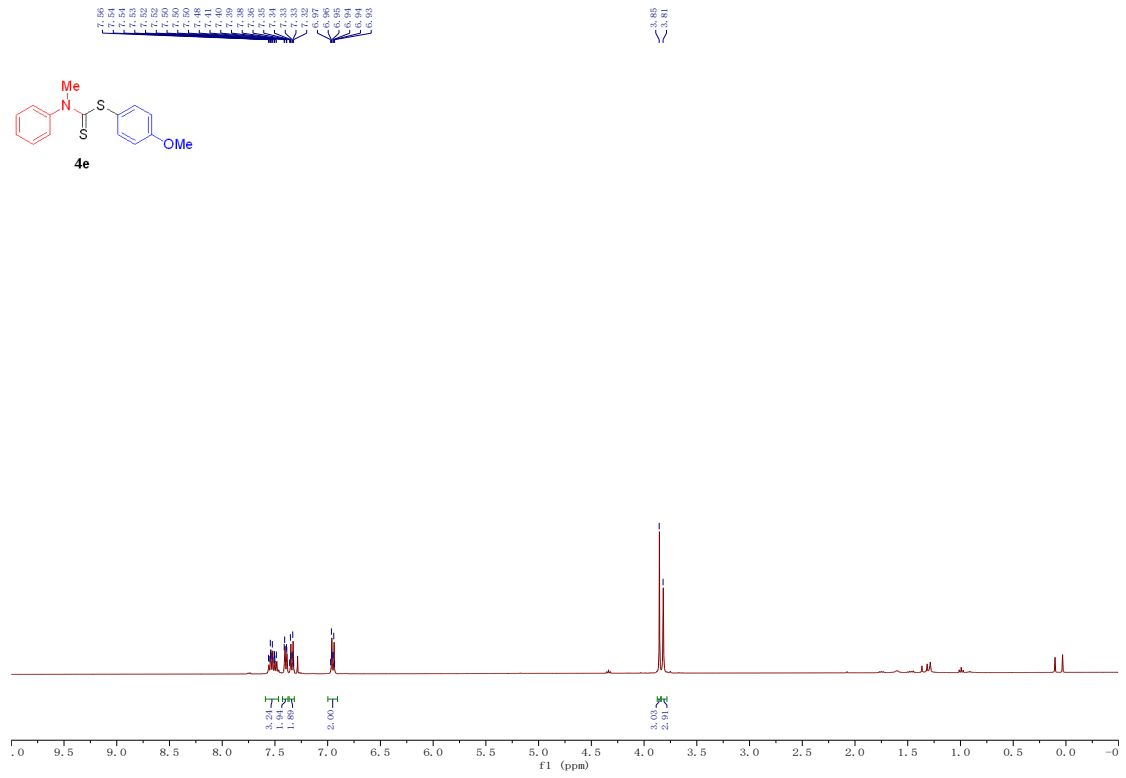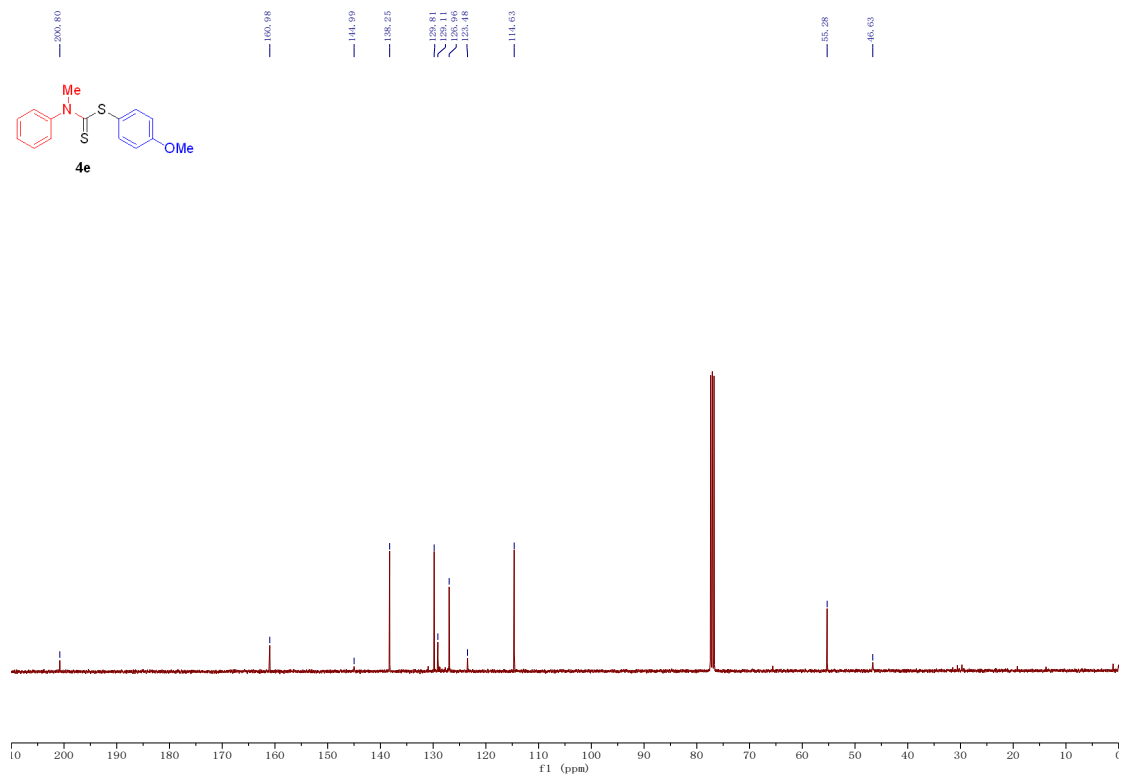

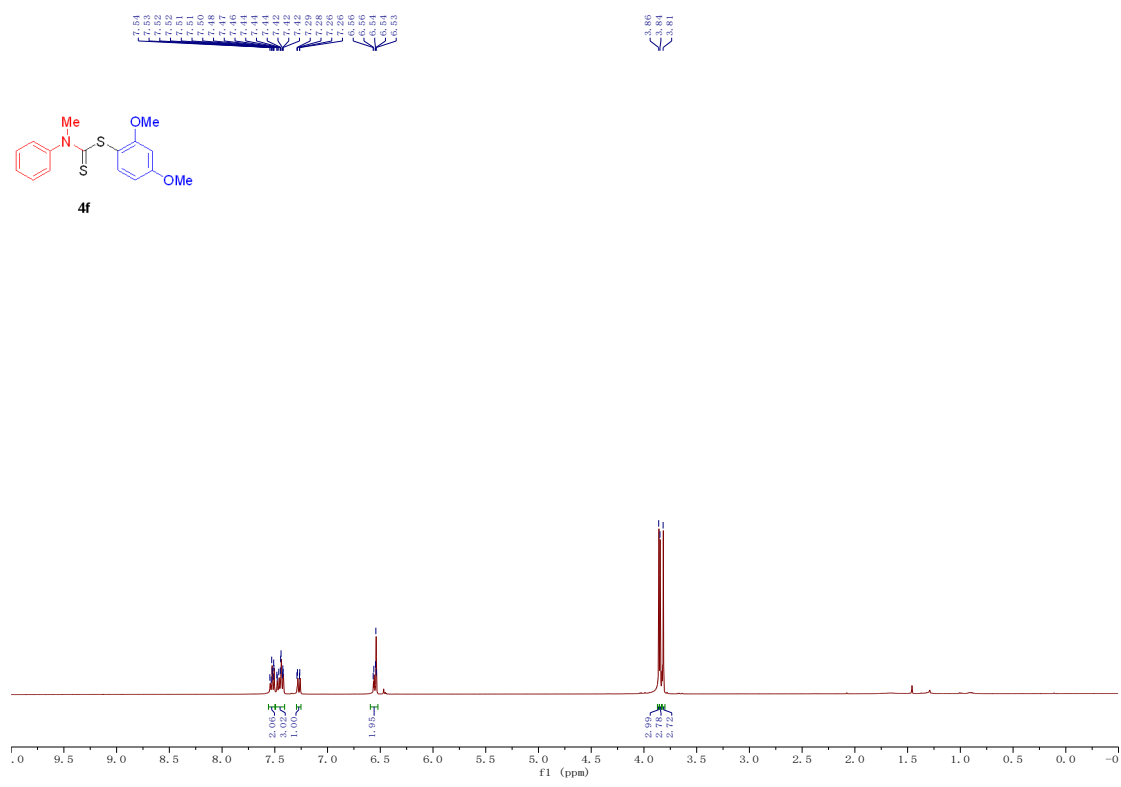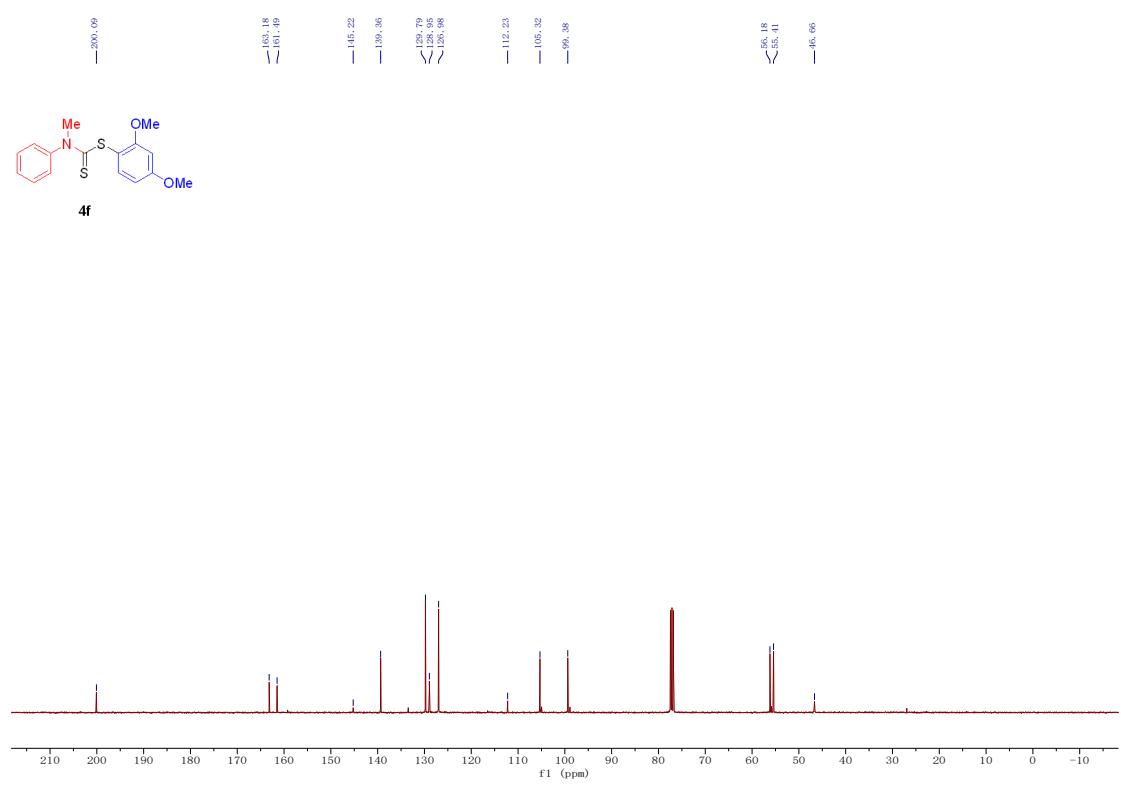

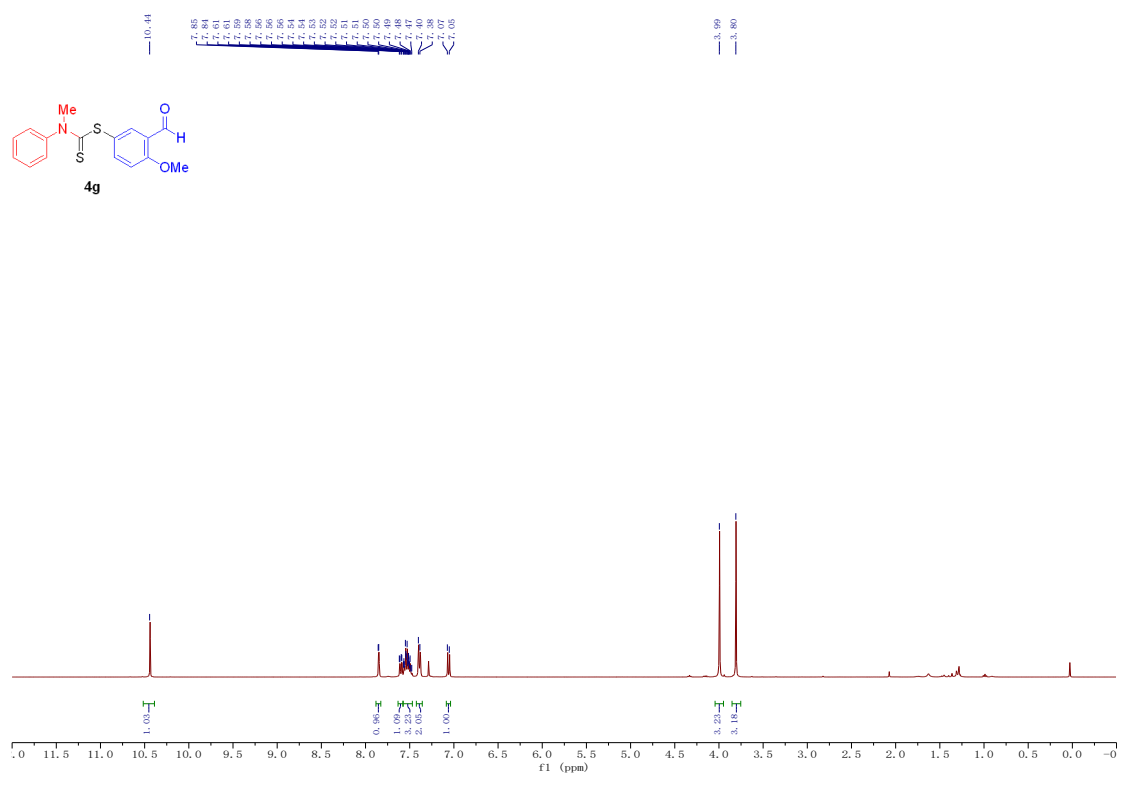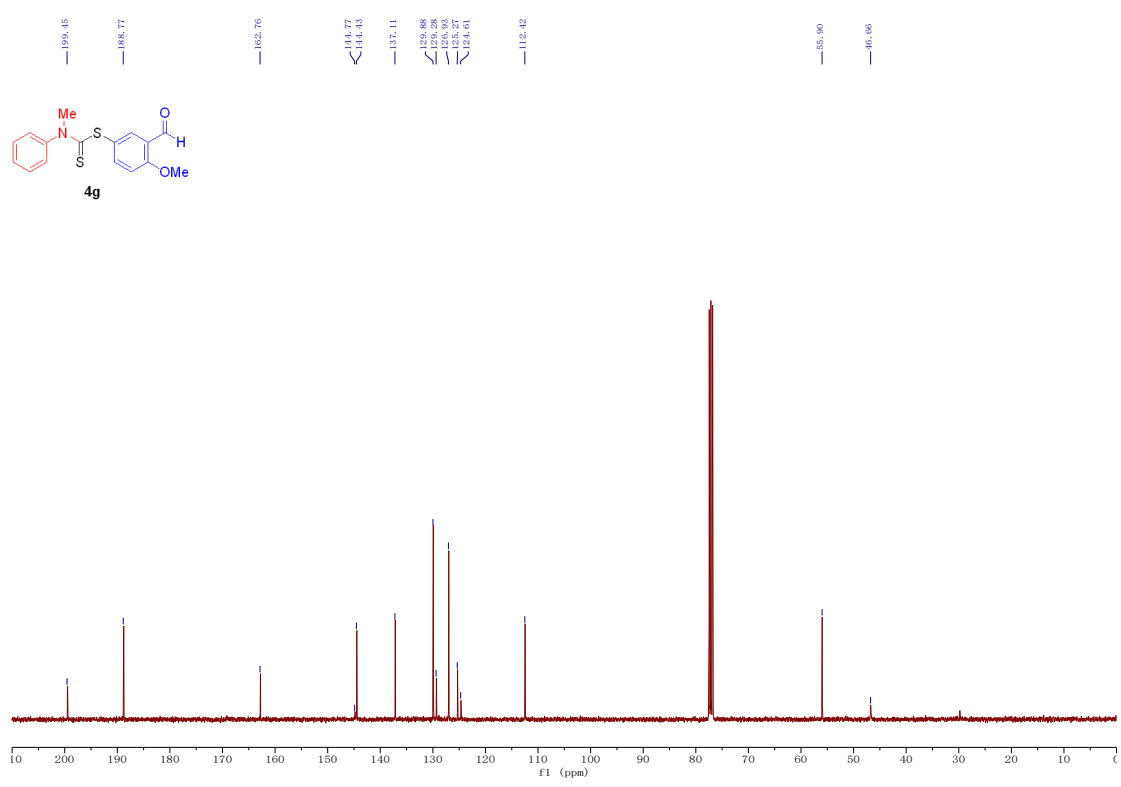

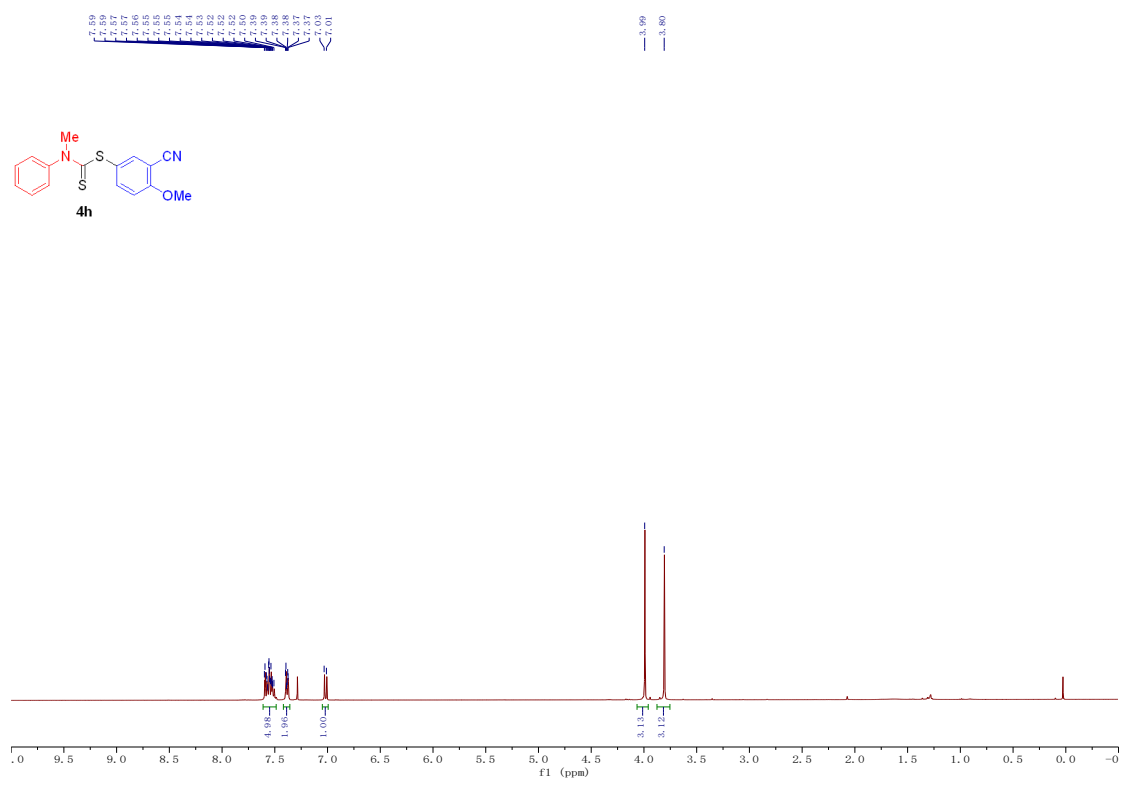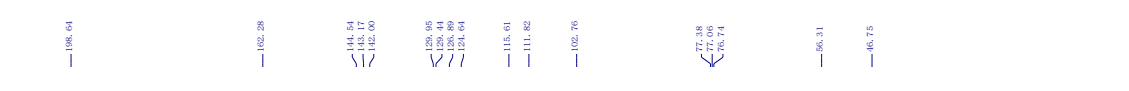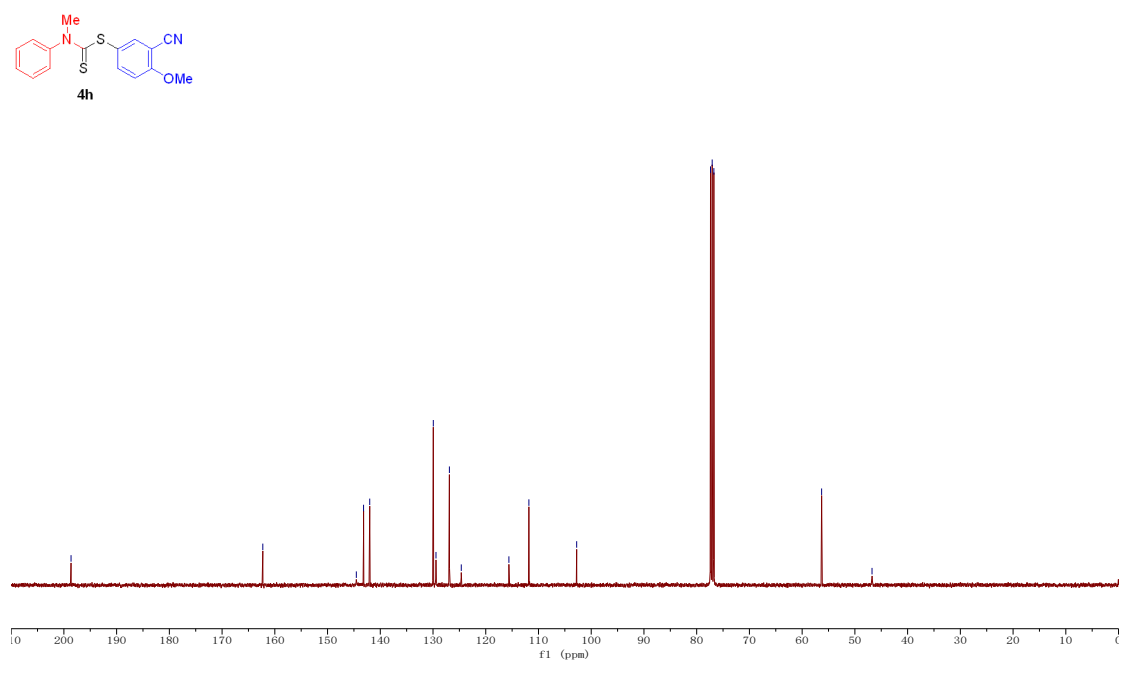



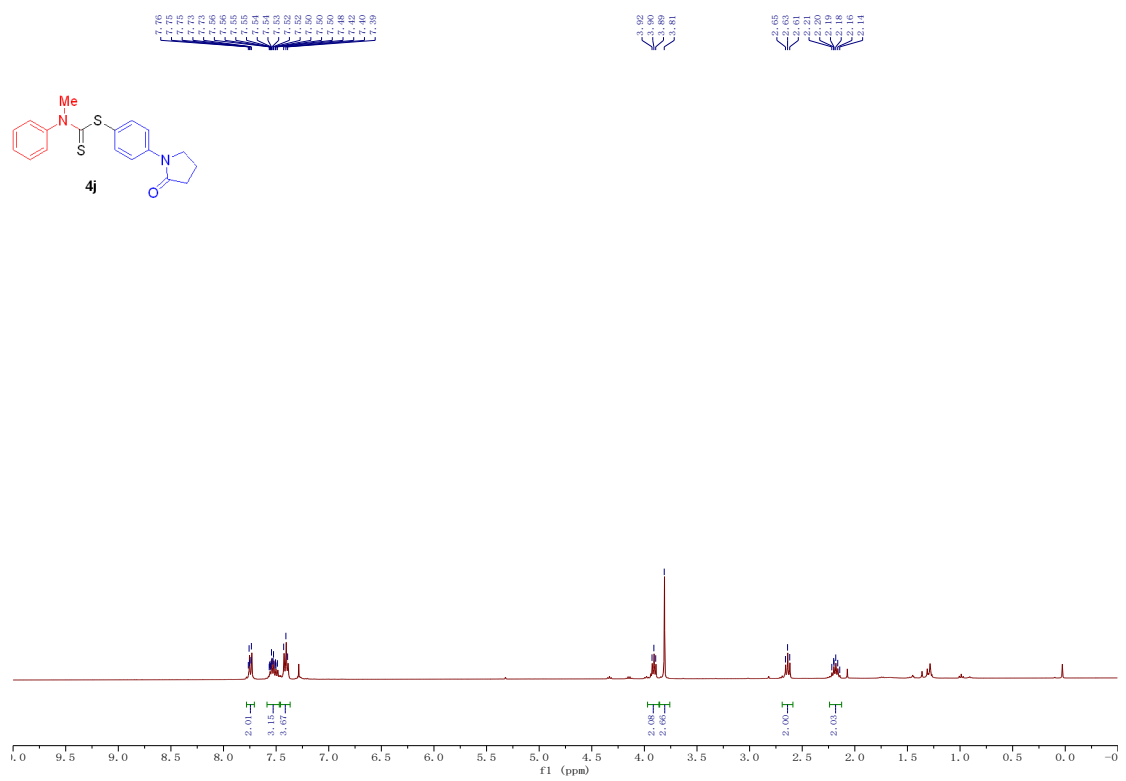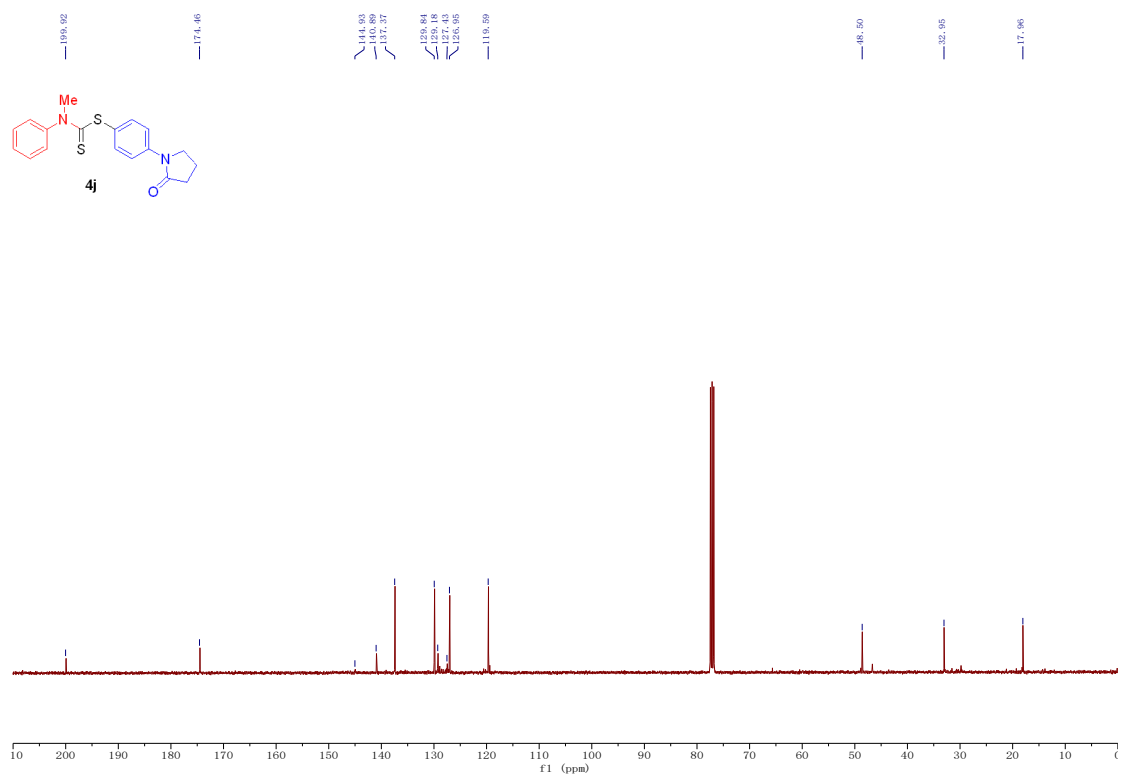

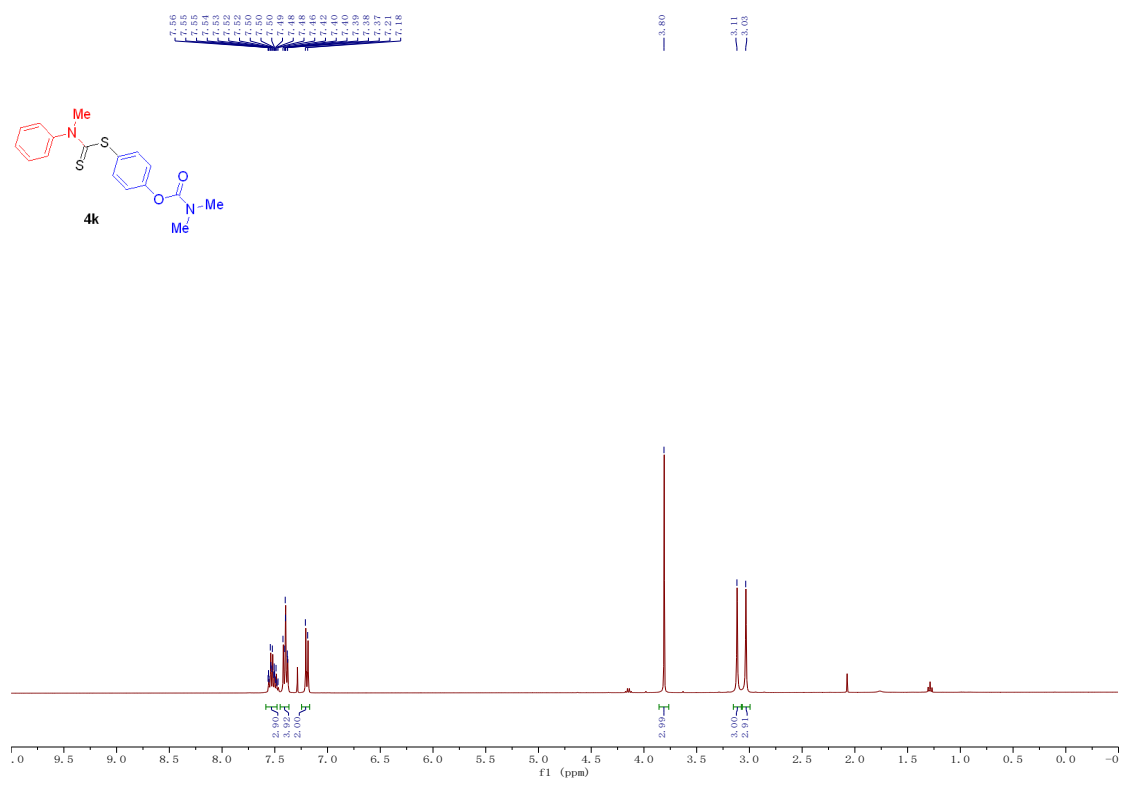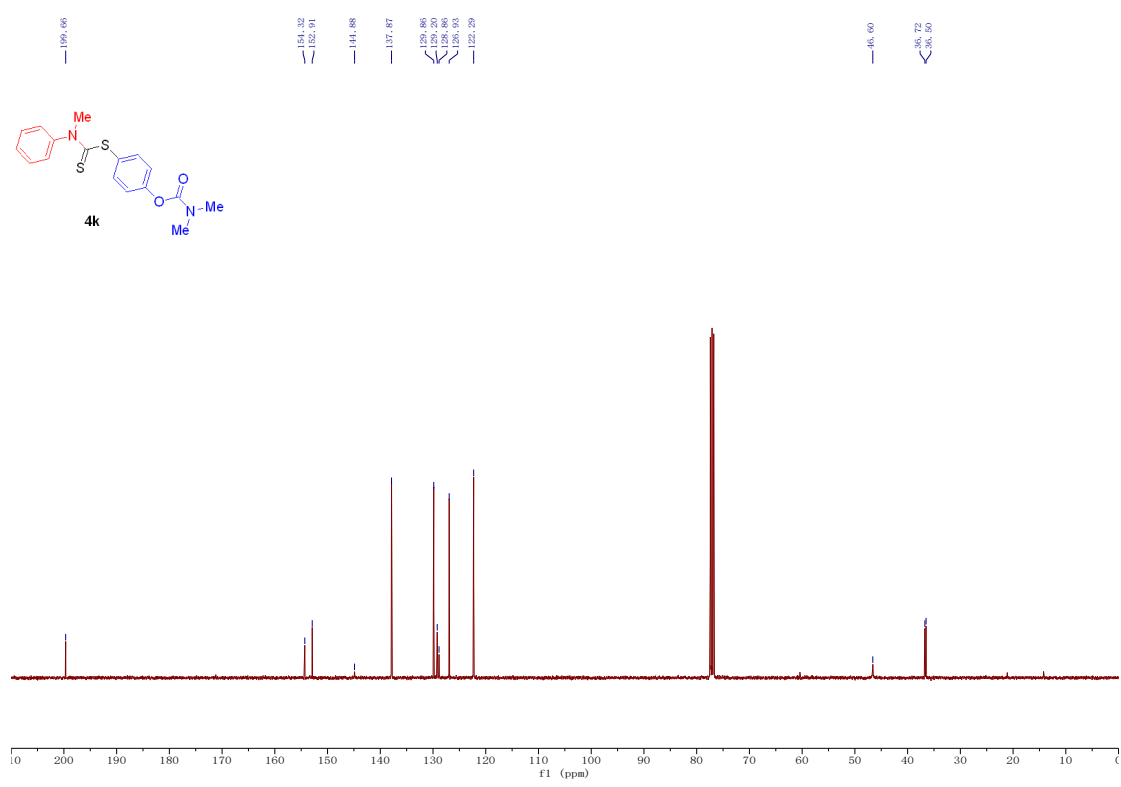



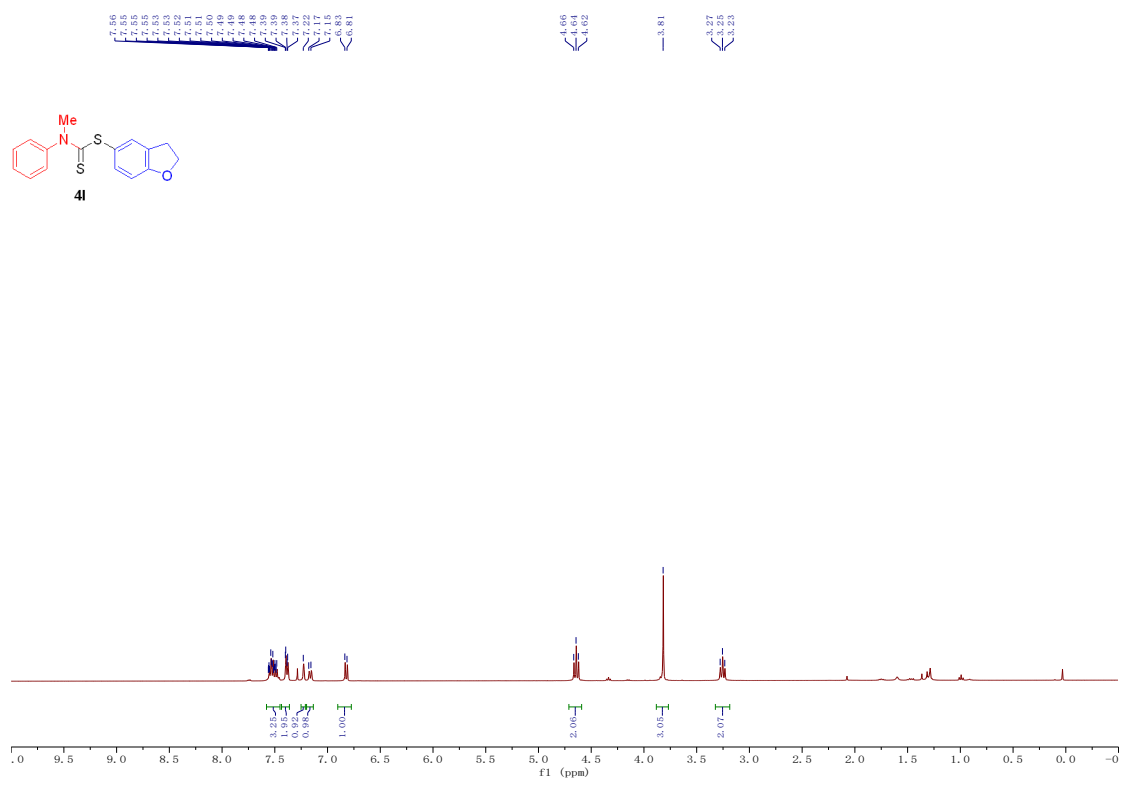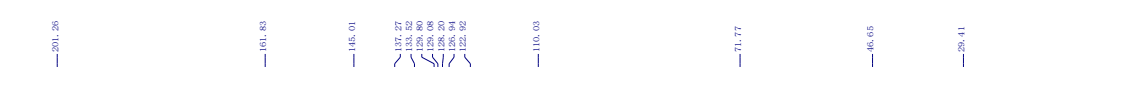



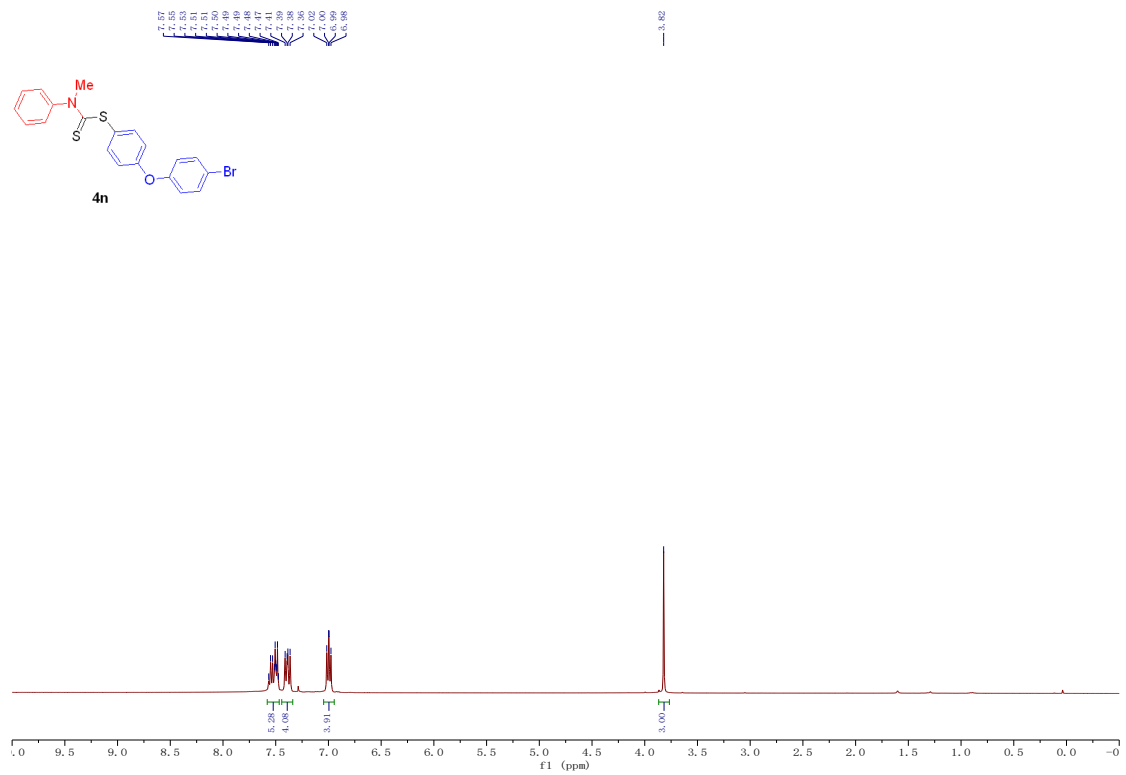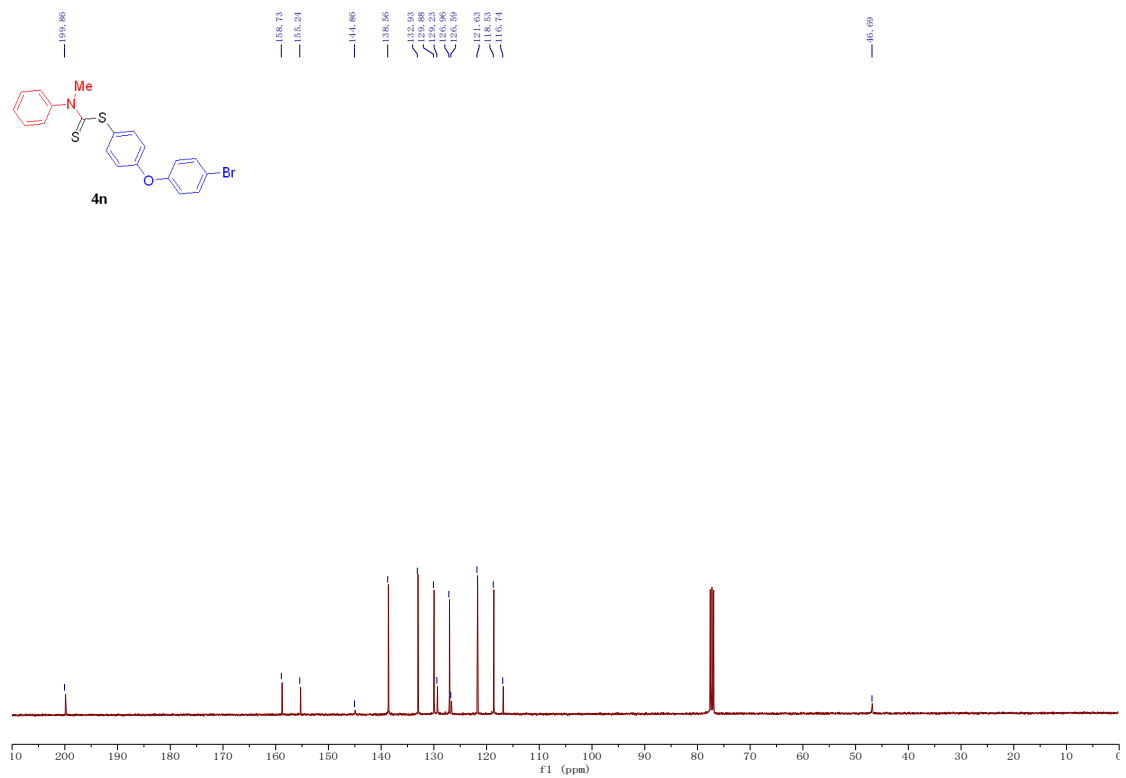

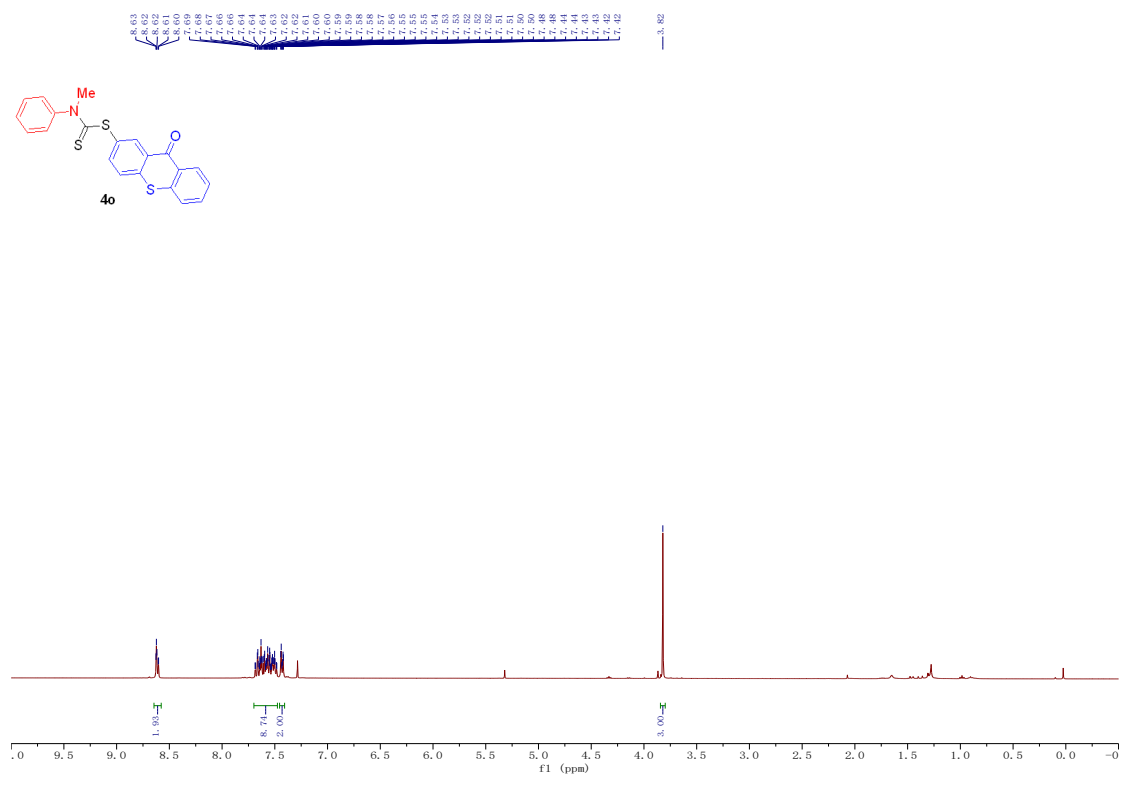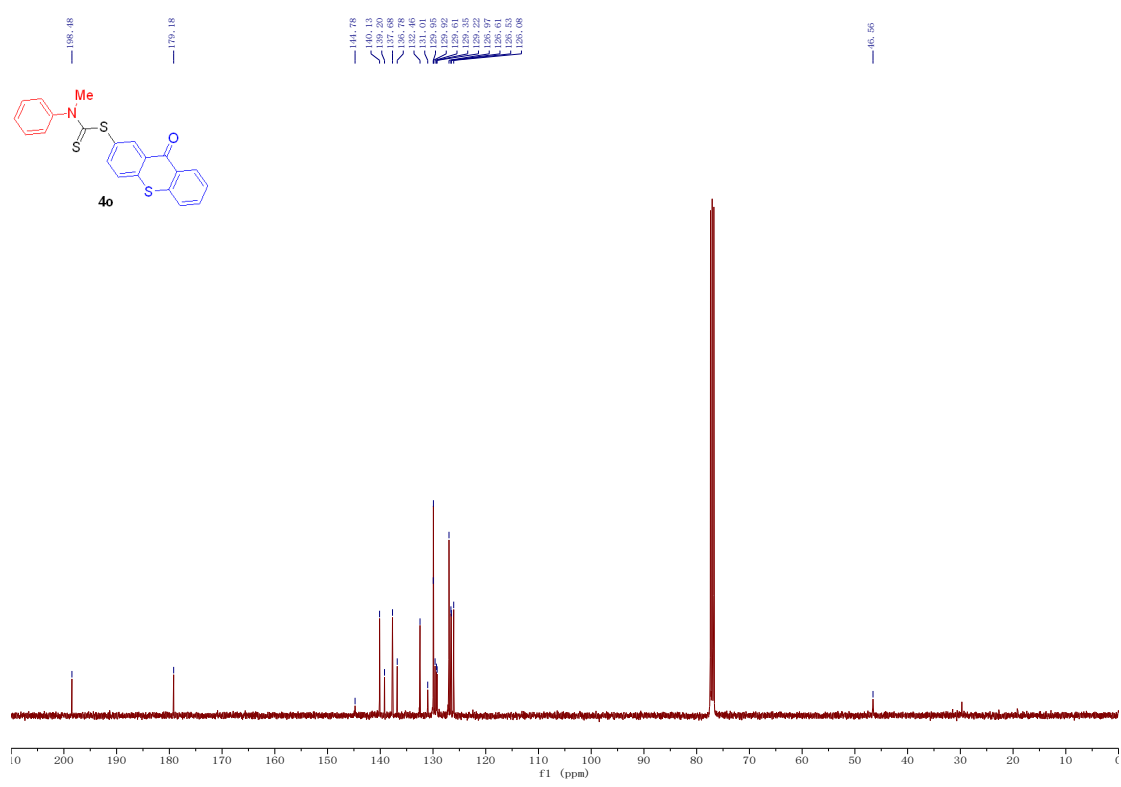

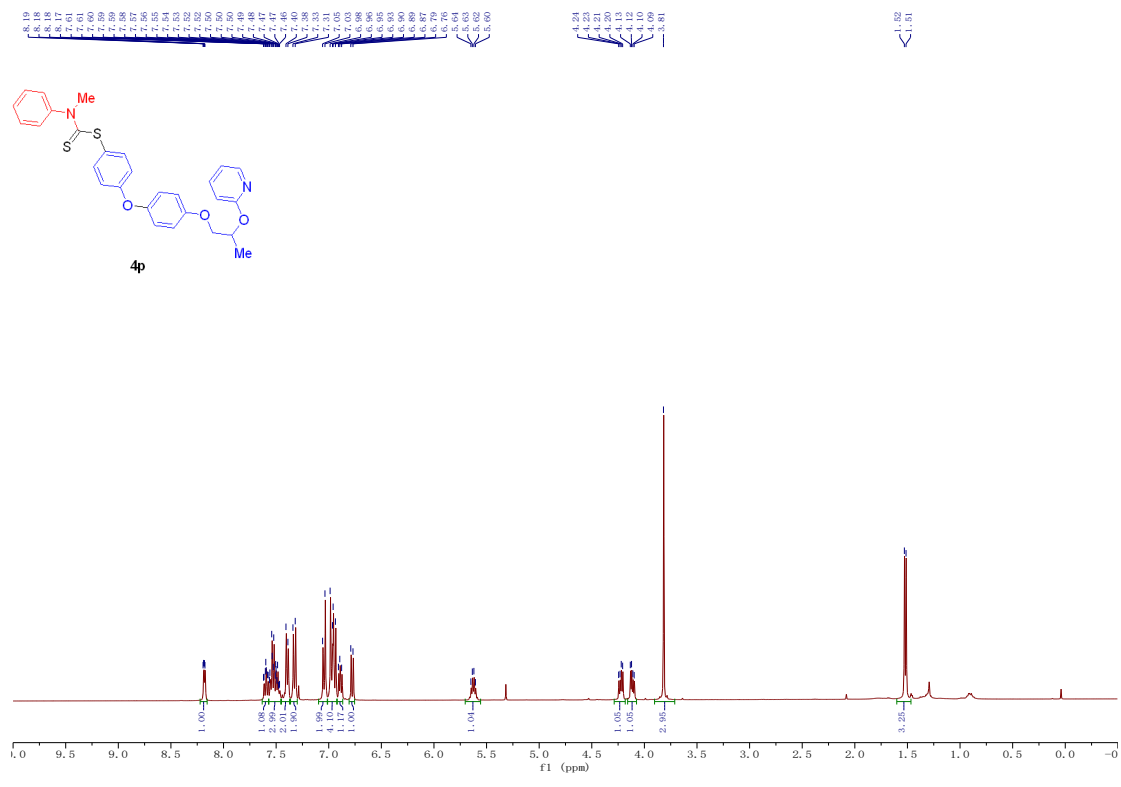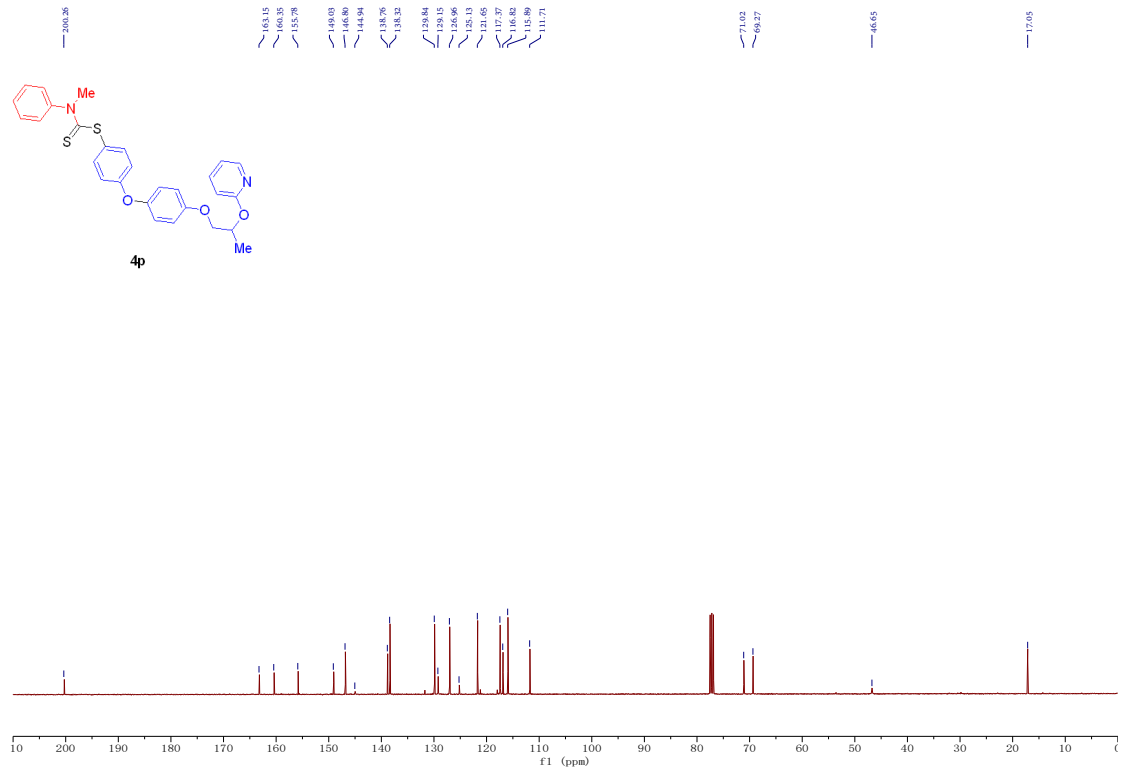

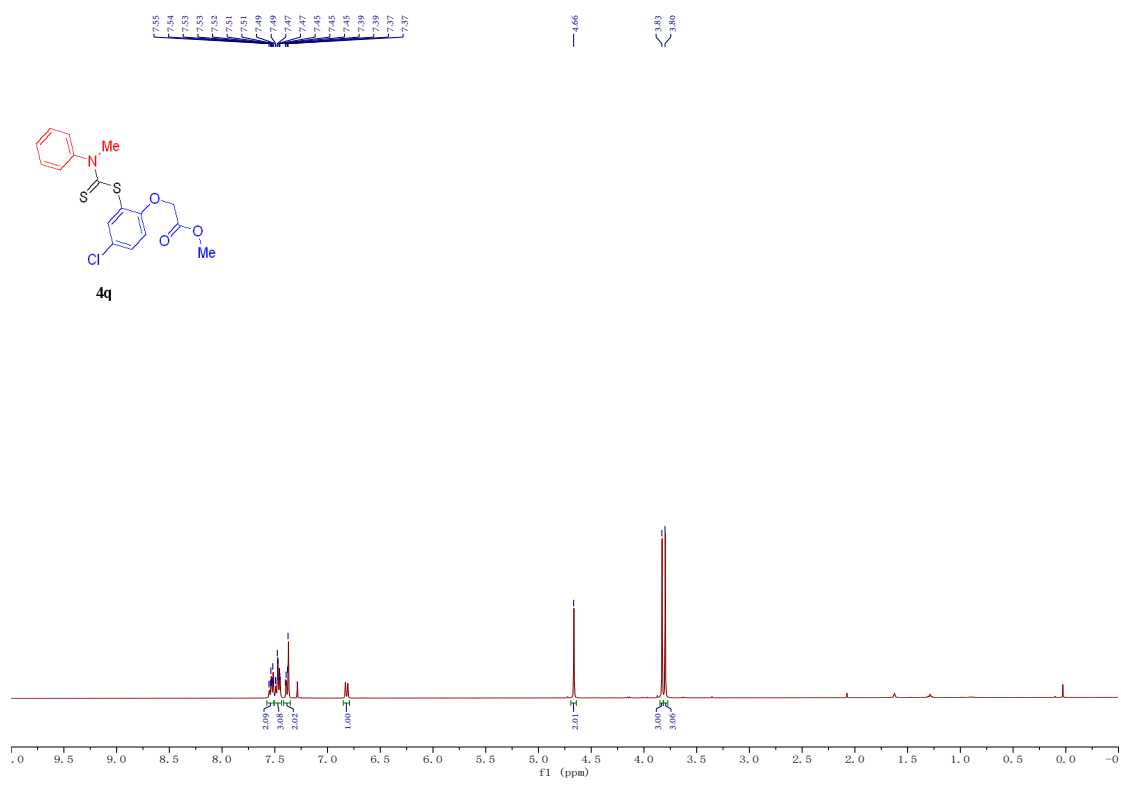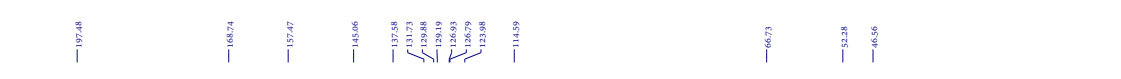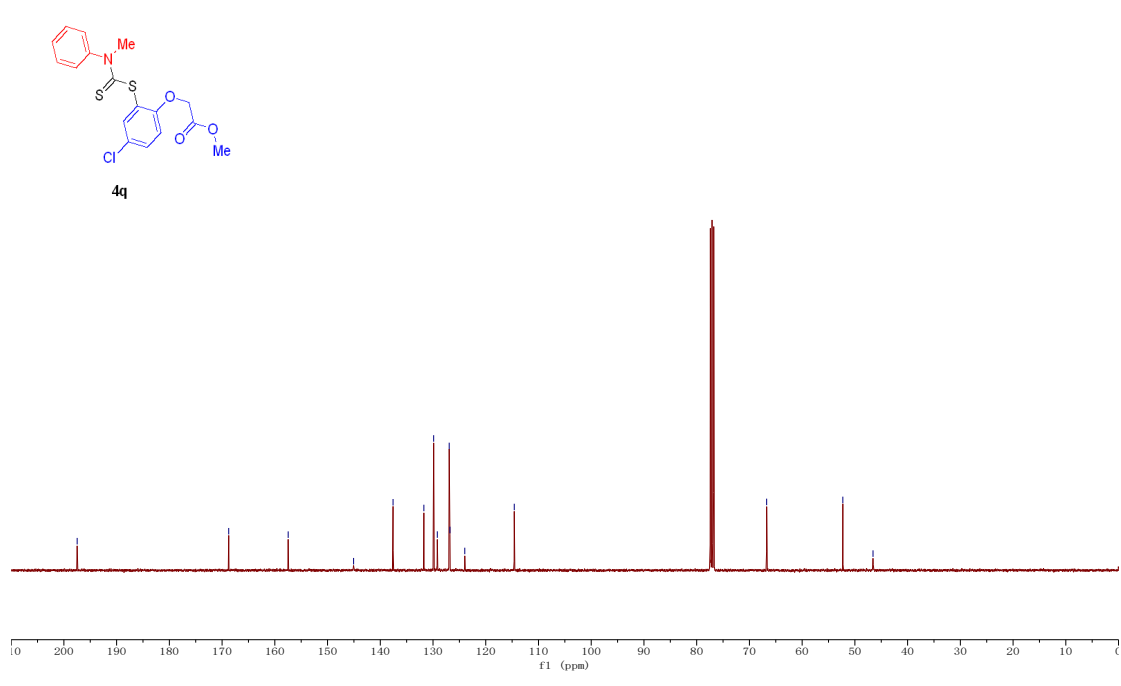

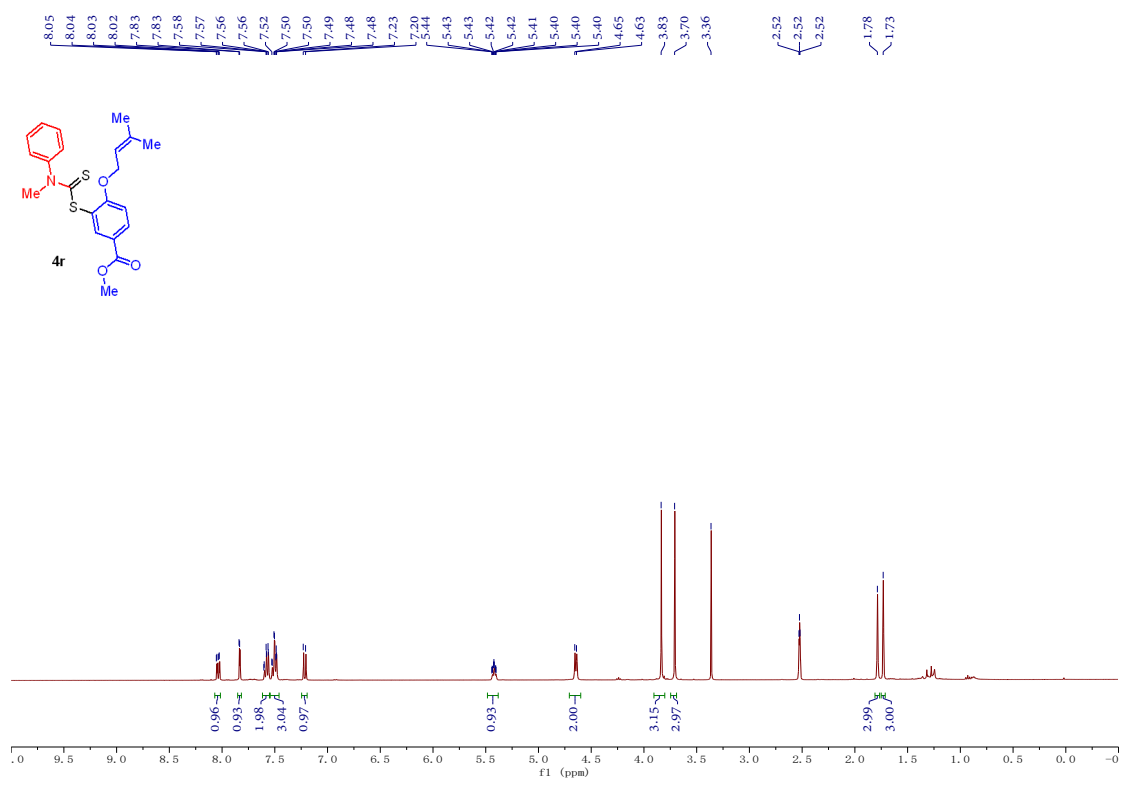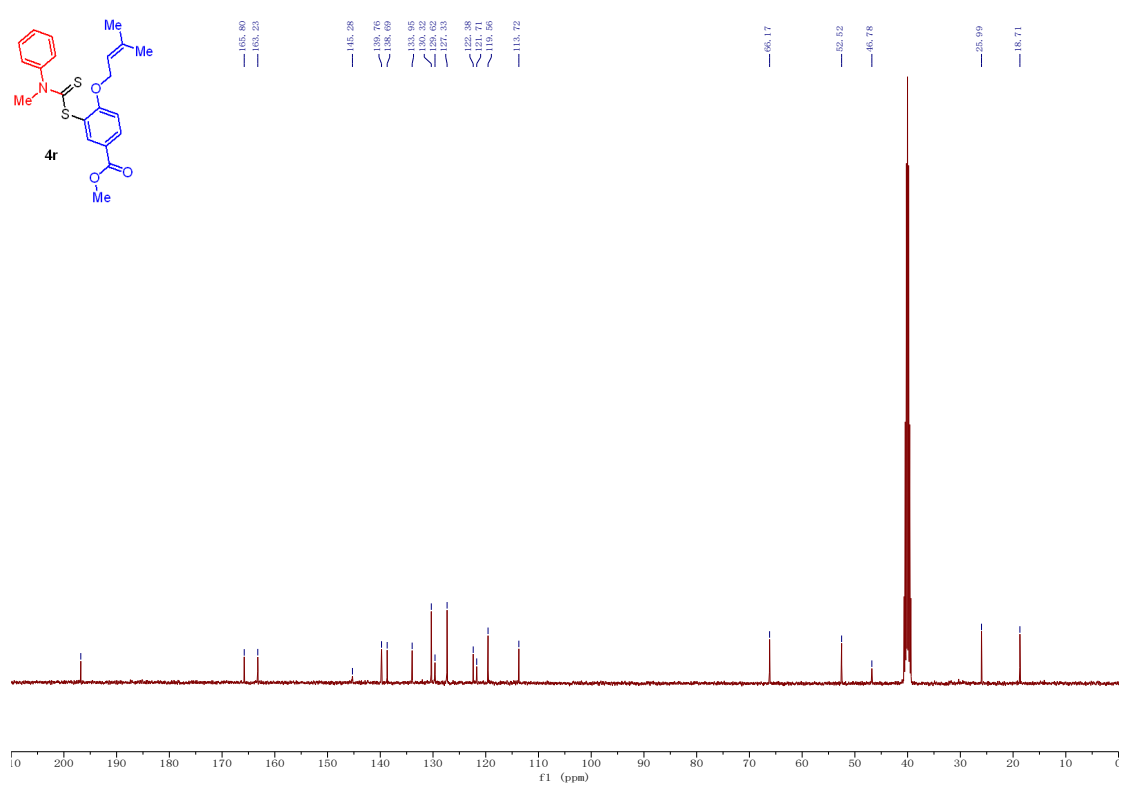

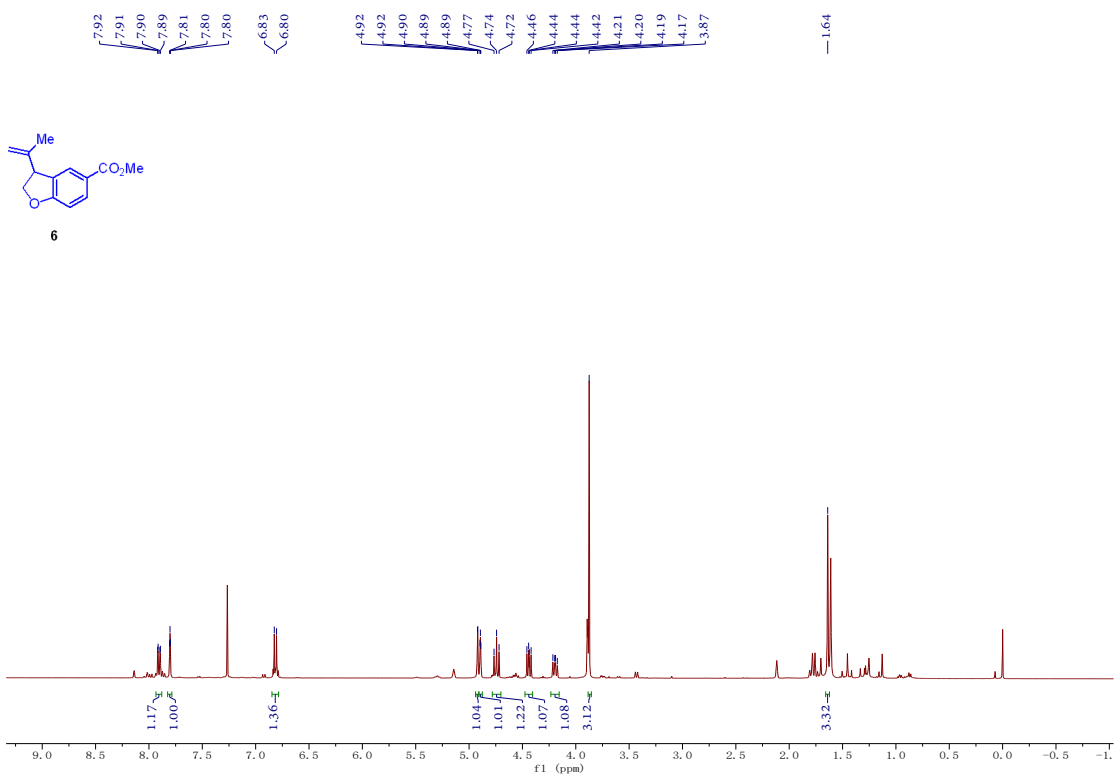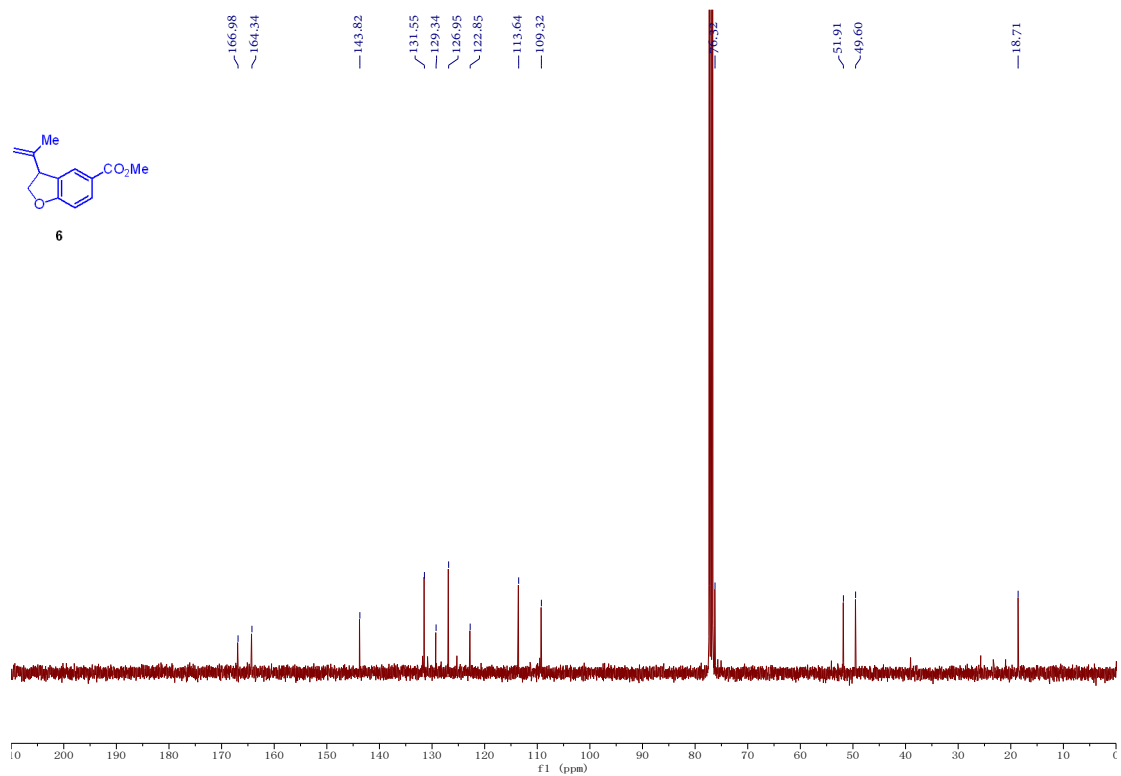

Supplement: d3gc00336a1.pdf [file d3gc00336a1.pdf]
